# Supplementary material for: Monoallylation and benzylation of dicarbonyl compounds with alcohols catalysed by a cationic cobalt(iii) compound
Source: Royal Society of Chemistry journal article supplement (doi:10.1039/d0ra09778k), 2021-01-01
Supplement: d0ra09778k1.pdf [file d0ra09778k1.pdf]

## Supplementary Information

### **Monoallylation and Benzylation of Dicarboxyl Compounds with Alcohols Catalysed by a Cationic Cobalt(III) Compound**

*Mohan Chandra Sau<sup>a</sup>, Smita Mandal<sup>a</sup> and Manish Bhattacharjee<sup>a\*</sup>*

<sup>a</sup>Department of Chemistry, Indian Institute of Technology Kharagpur, 721302, India

[mxh@iitkqp.ac.in](mailto:mxh@iitkqp.ac.in)

#### **Contents:**

|                                                                         |    |
|-------------------------------------------------------------------------|----|
| 1. In situ <sup>1</sup> HNMR spectra for mechanistic investigation..... | S2 |
| 2. NMR and HRMS spectra of the compounds.....                           | S3 |

### In situ $^1\text{H}$ NMR spectra for mechanistic investigation:

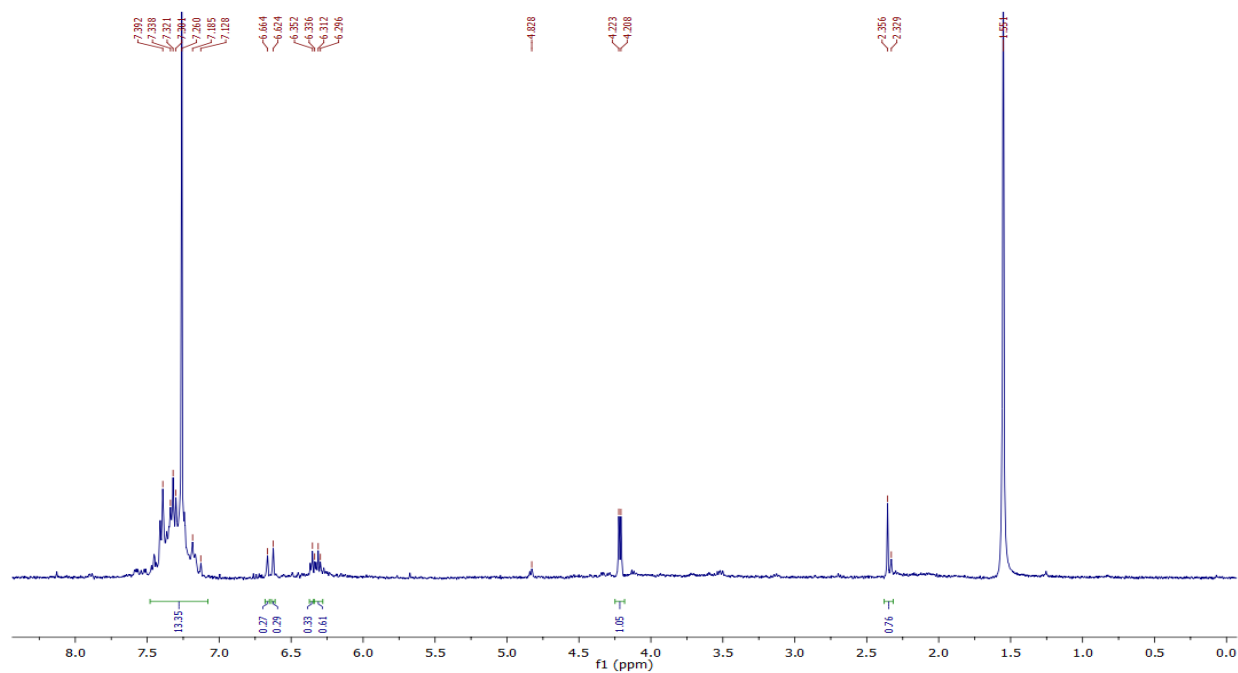

Figure S1  $^1\text{H}$  NMR spectrum of the reaction mixture of cinnamyl alcohol and catalyst (1 mol%) was heated at 60 °C for 18 h in toluene (2 ml)

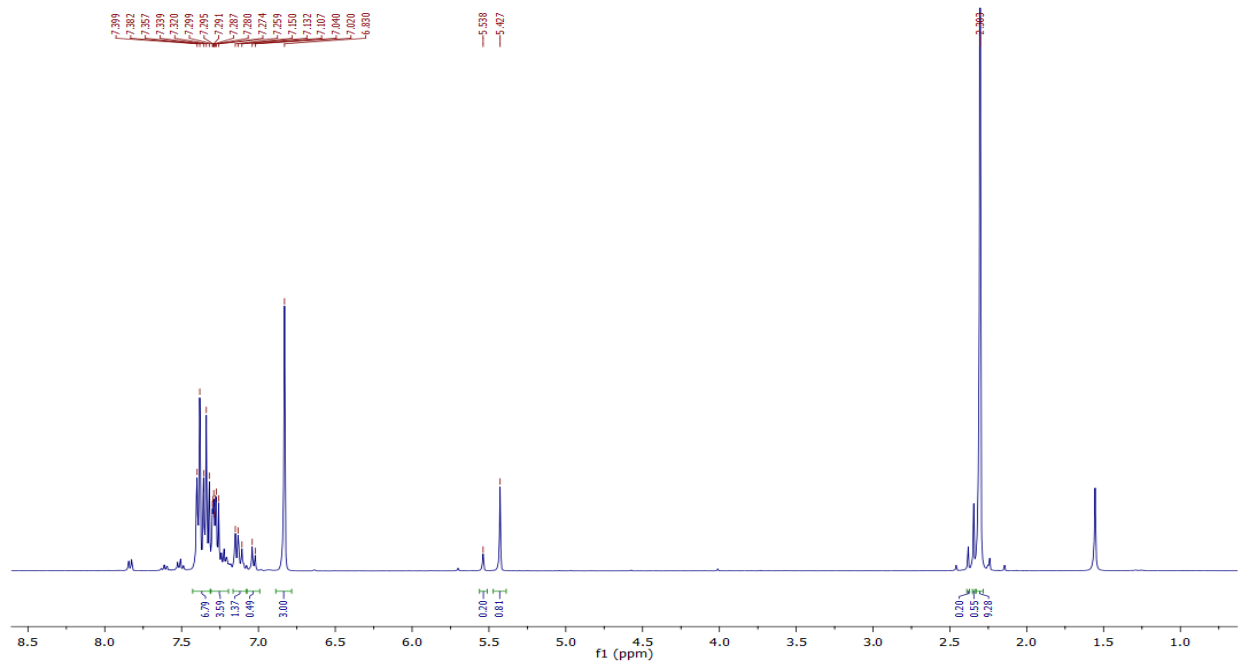

Figure S2  $^1\text{H}$  NMR spectrum of the crude reaction mixture of diphenylmethanol (0.4 mmol) and catalyst (1mol%) at 110°C after 4hrs

# NMR and HRMS spectra of the products

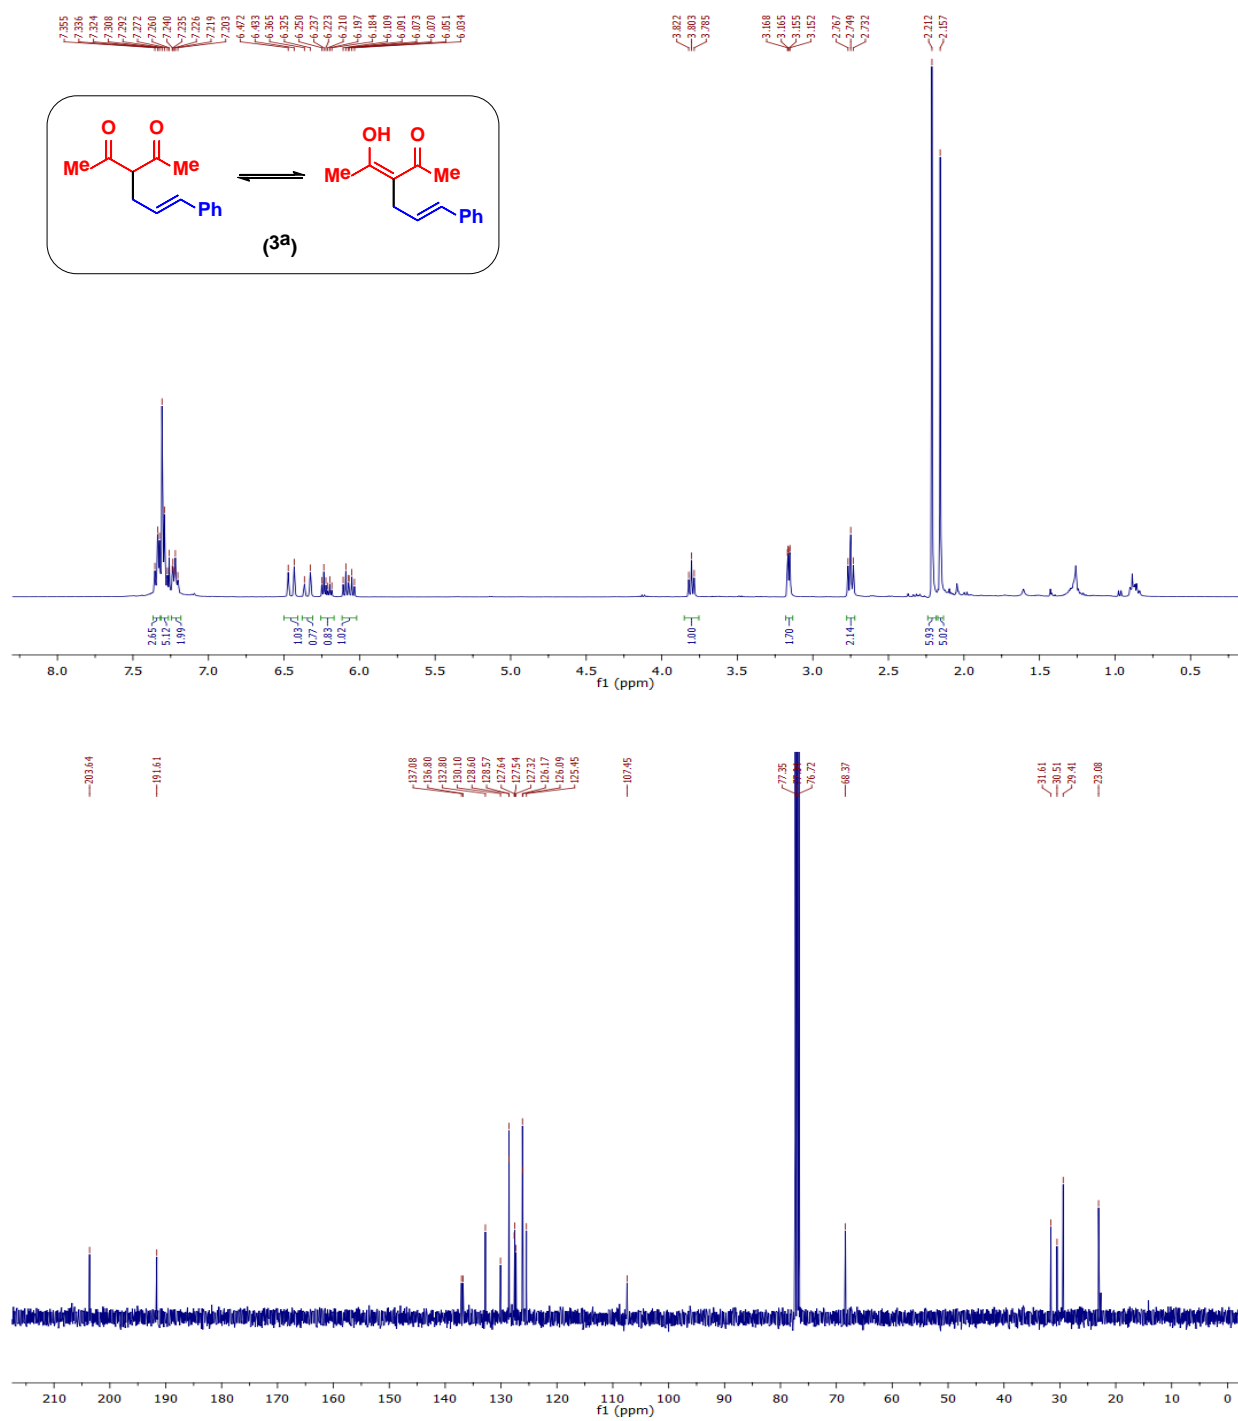

Figure S3 <sup>1</sup>H and <sup>13</sup>C NMR spectra of **3a**

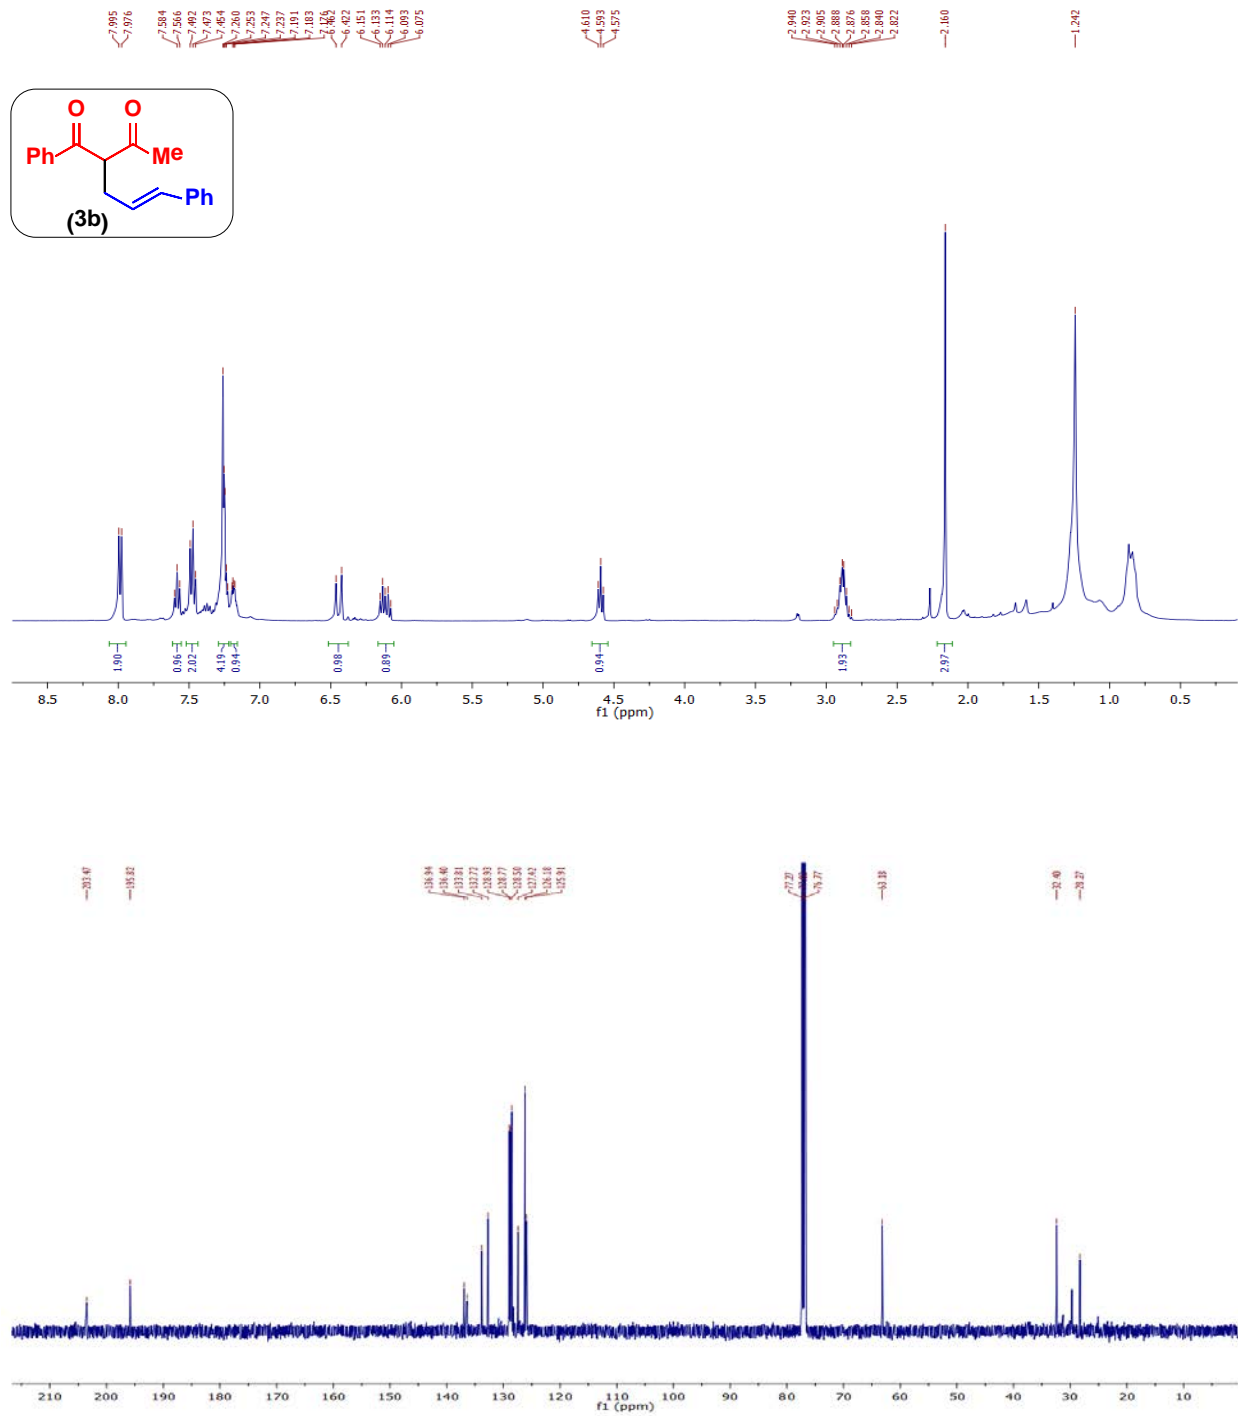

Figure S4 <sup>1</sup>H and <sup>13</sup>C NMR spectra of **3b**

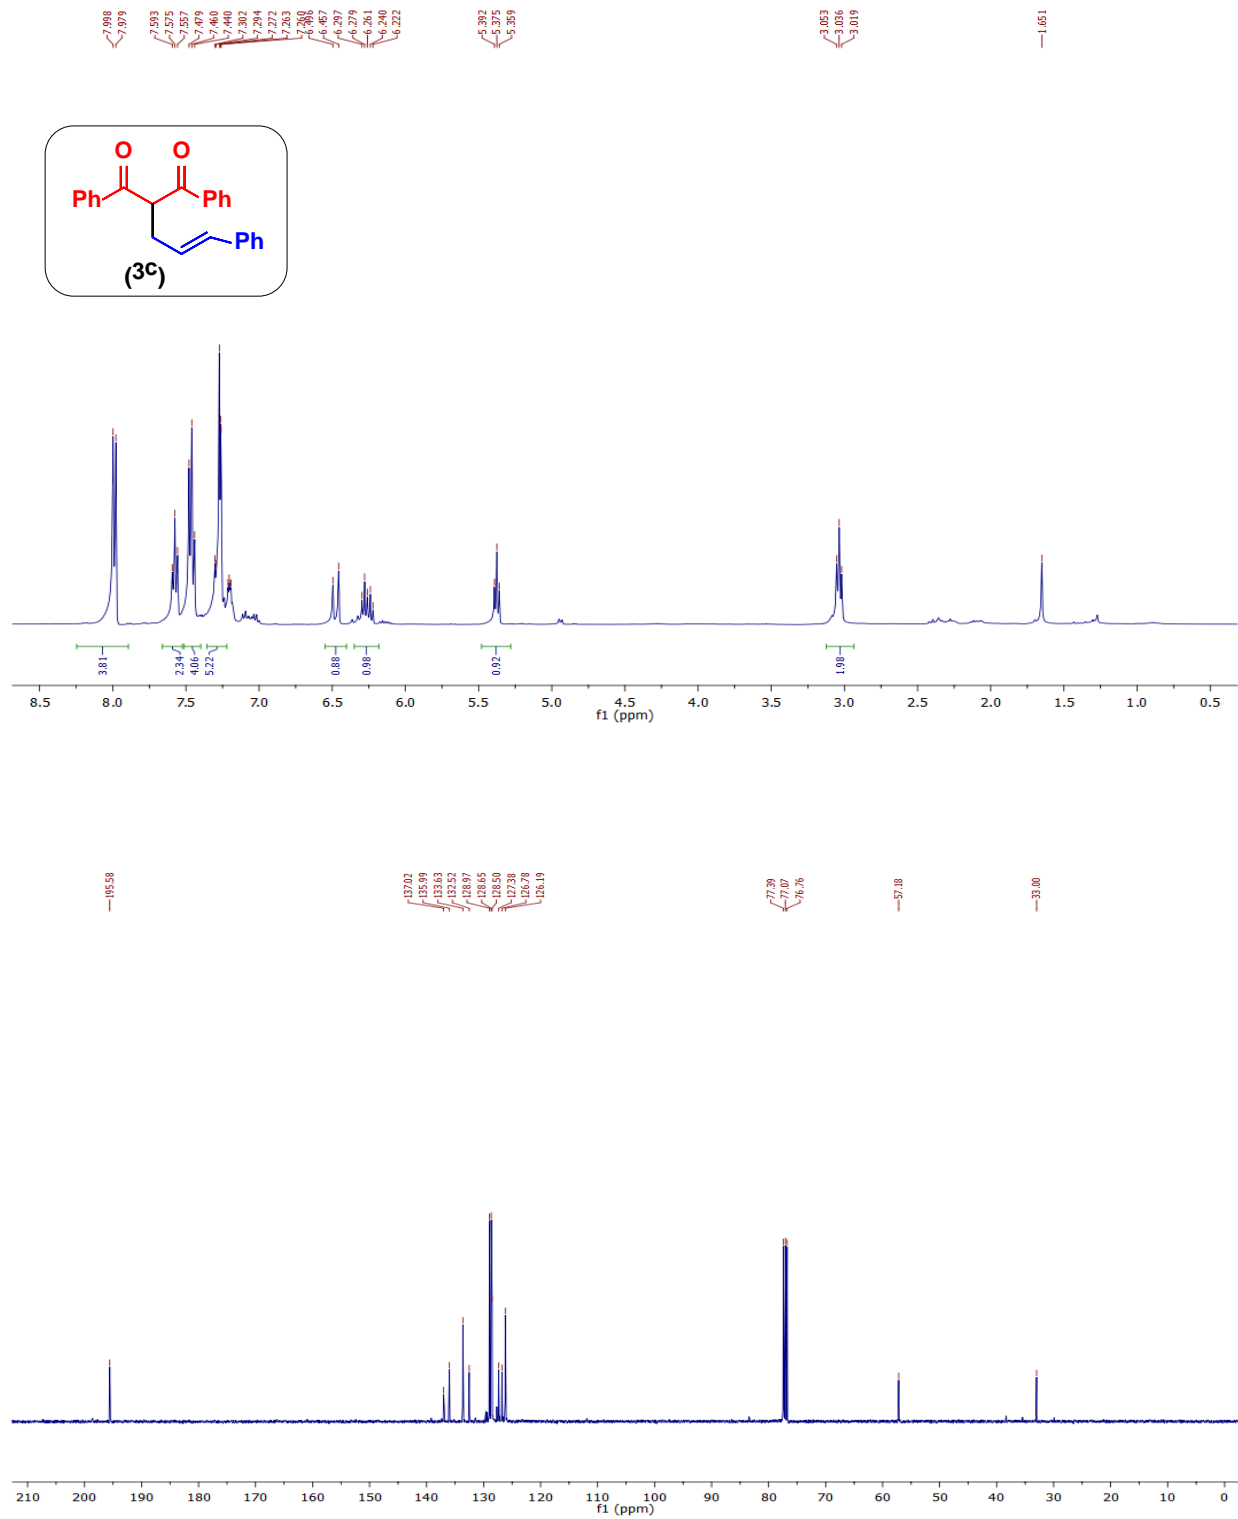

Figure S5 <sup>1</sup>H and <sup>13</sup>C NMR spectra of **3c**

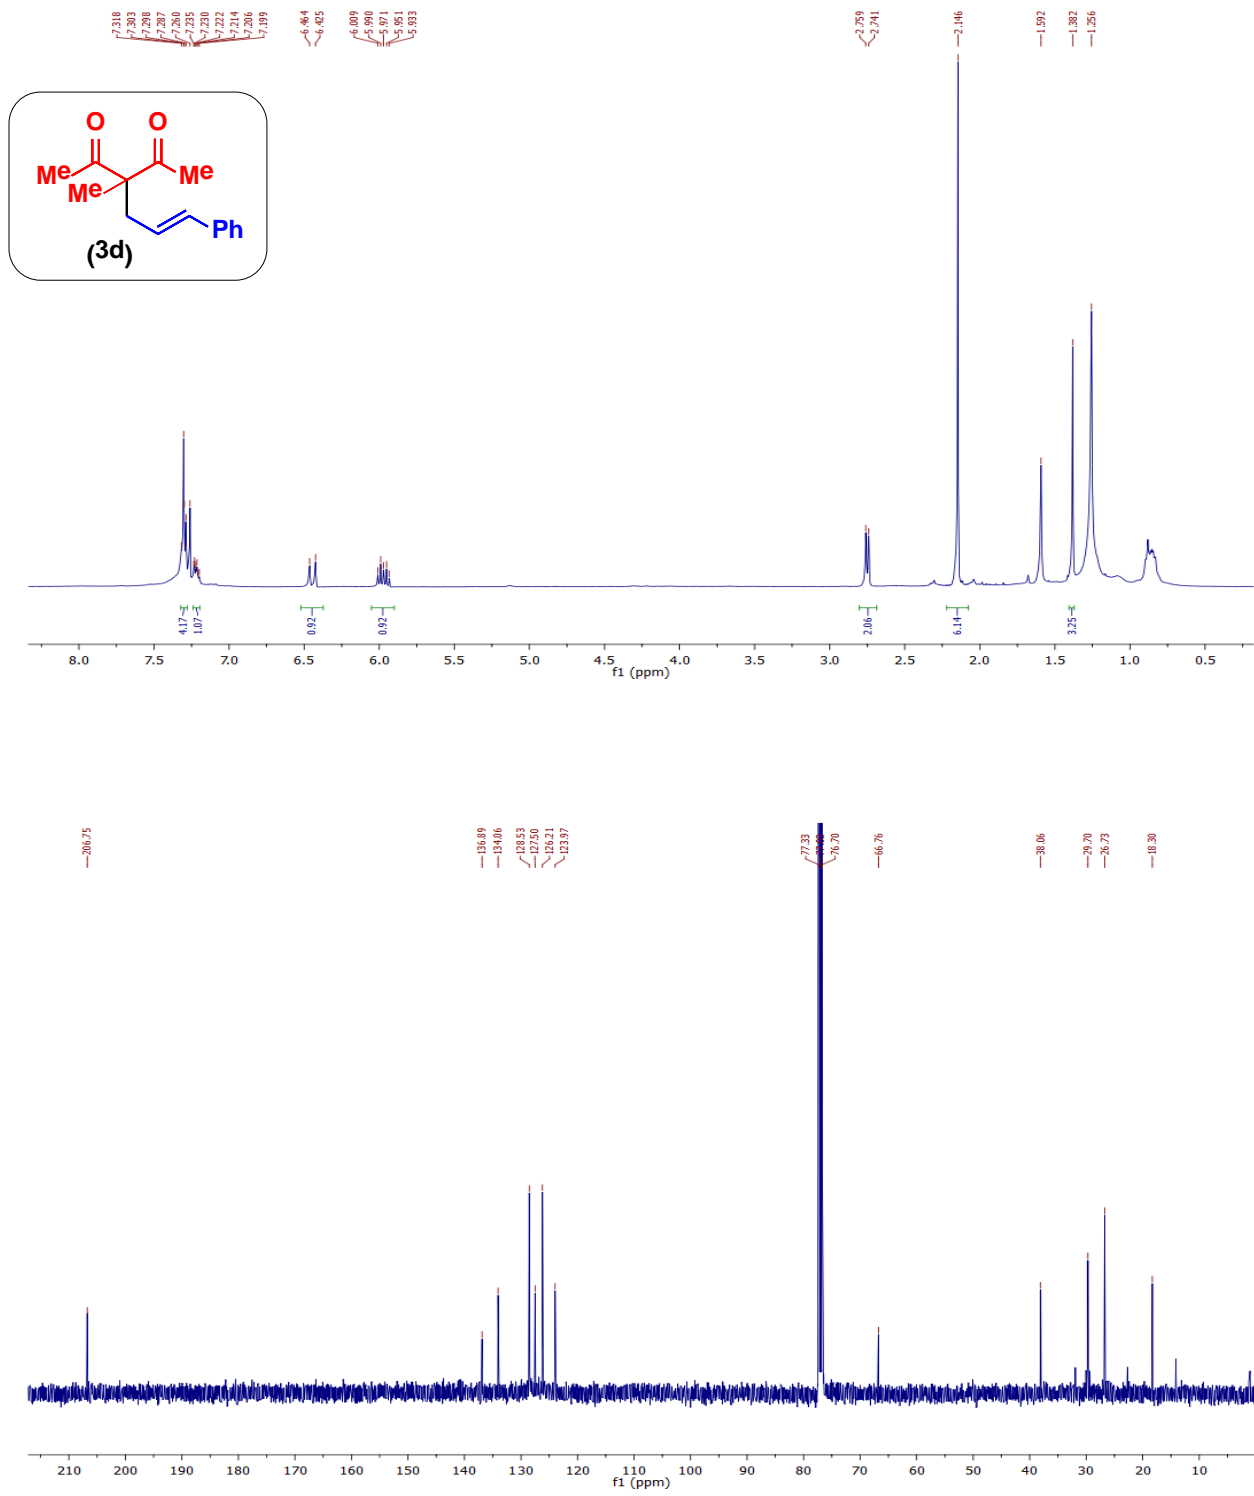

Figure S6 <sup>1</sup>H and <sup>13</sup>C NMR spectra of **3d**

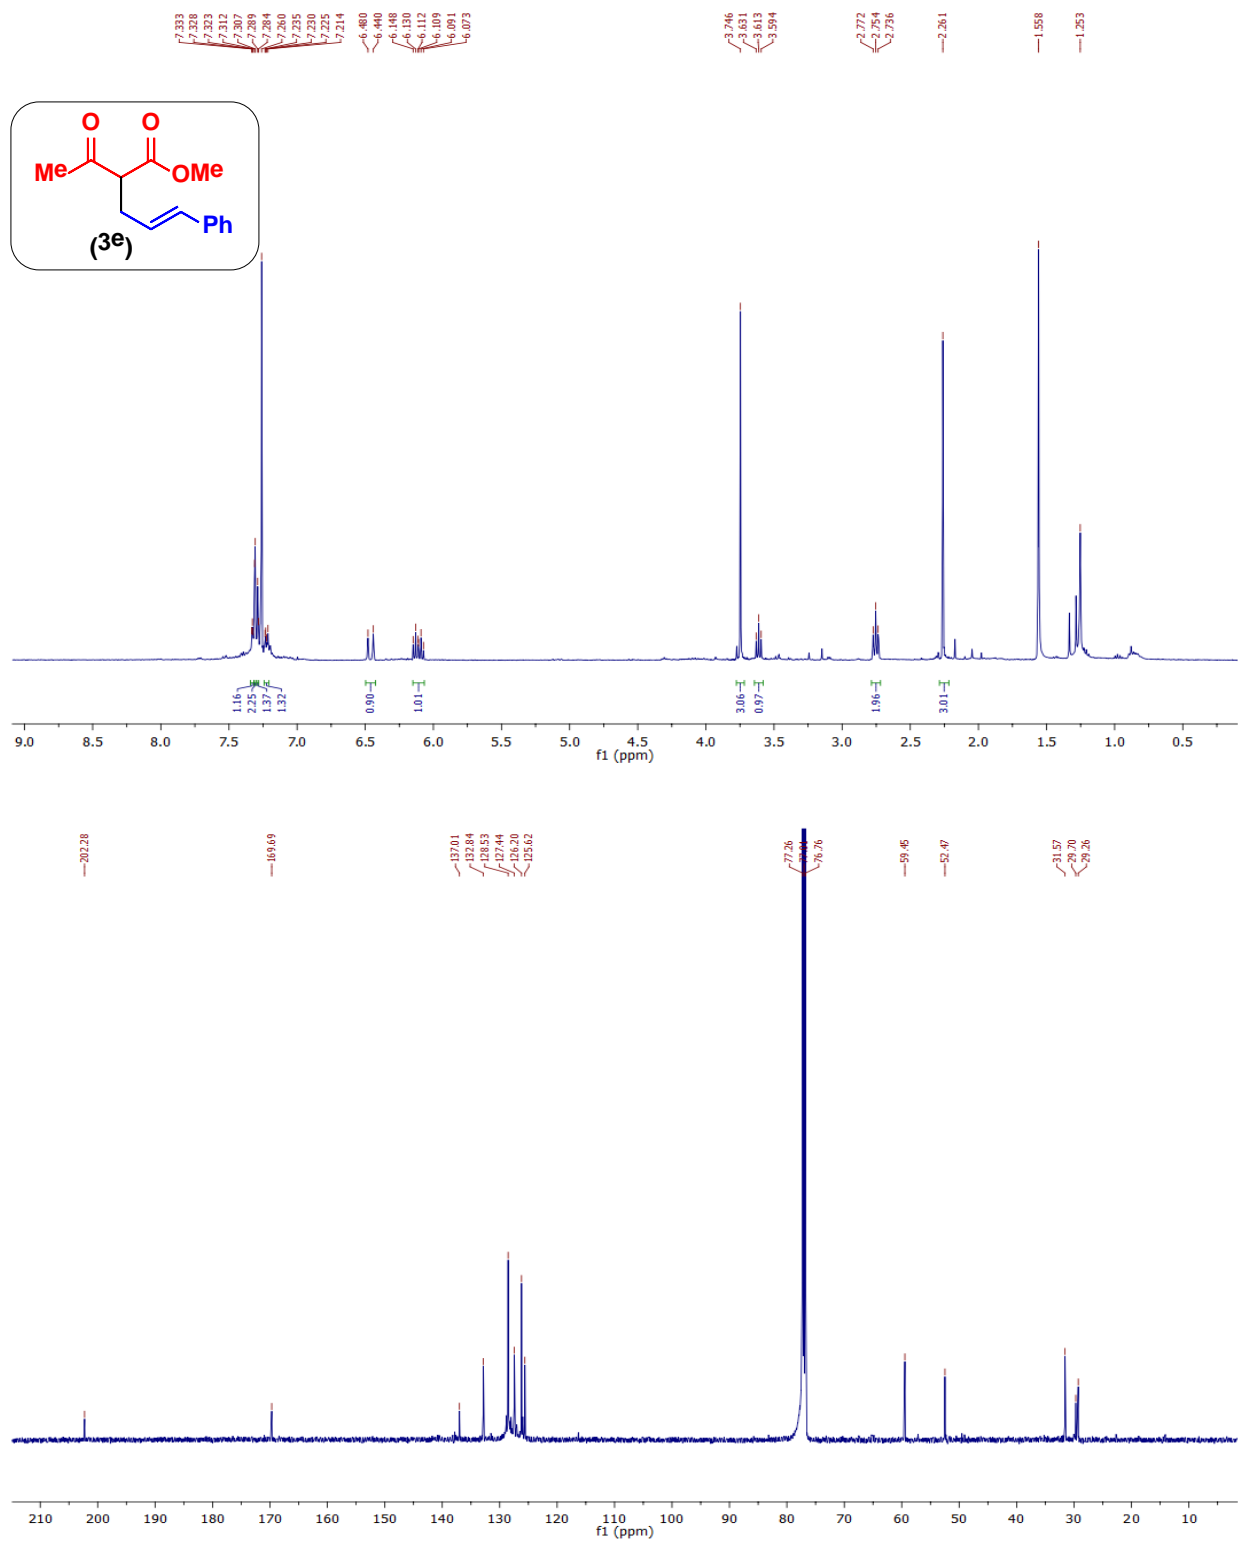

Figure S7 <sup>1</sup>H and <sup>13</sup>C NMR spectra of **3e**

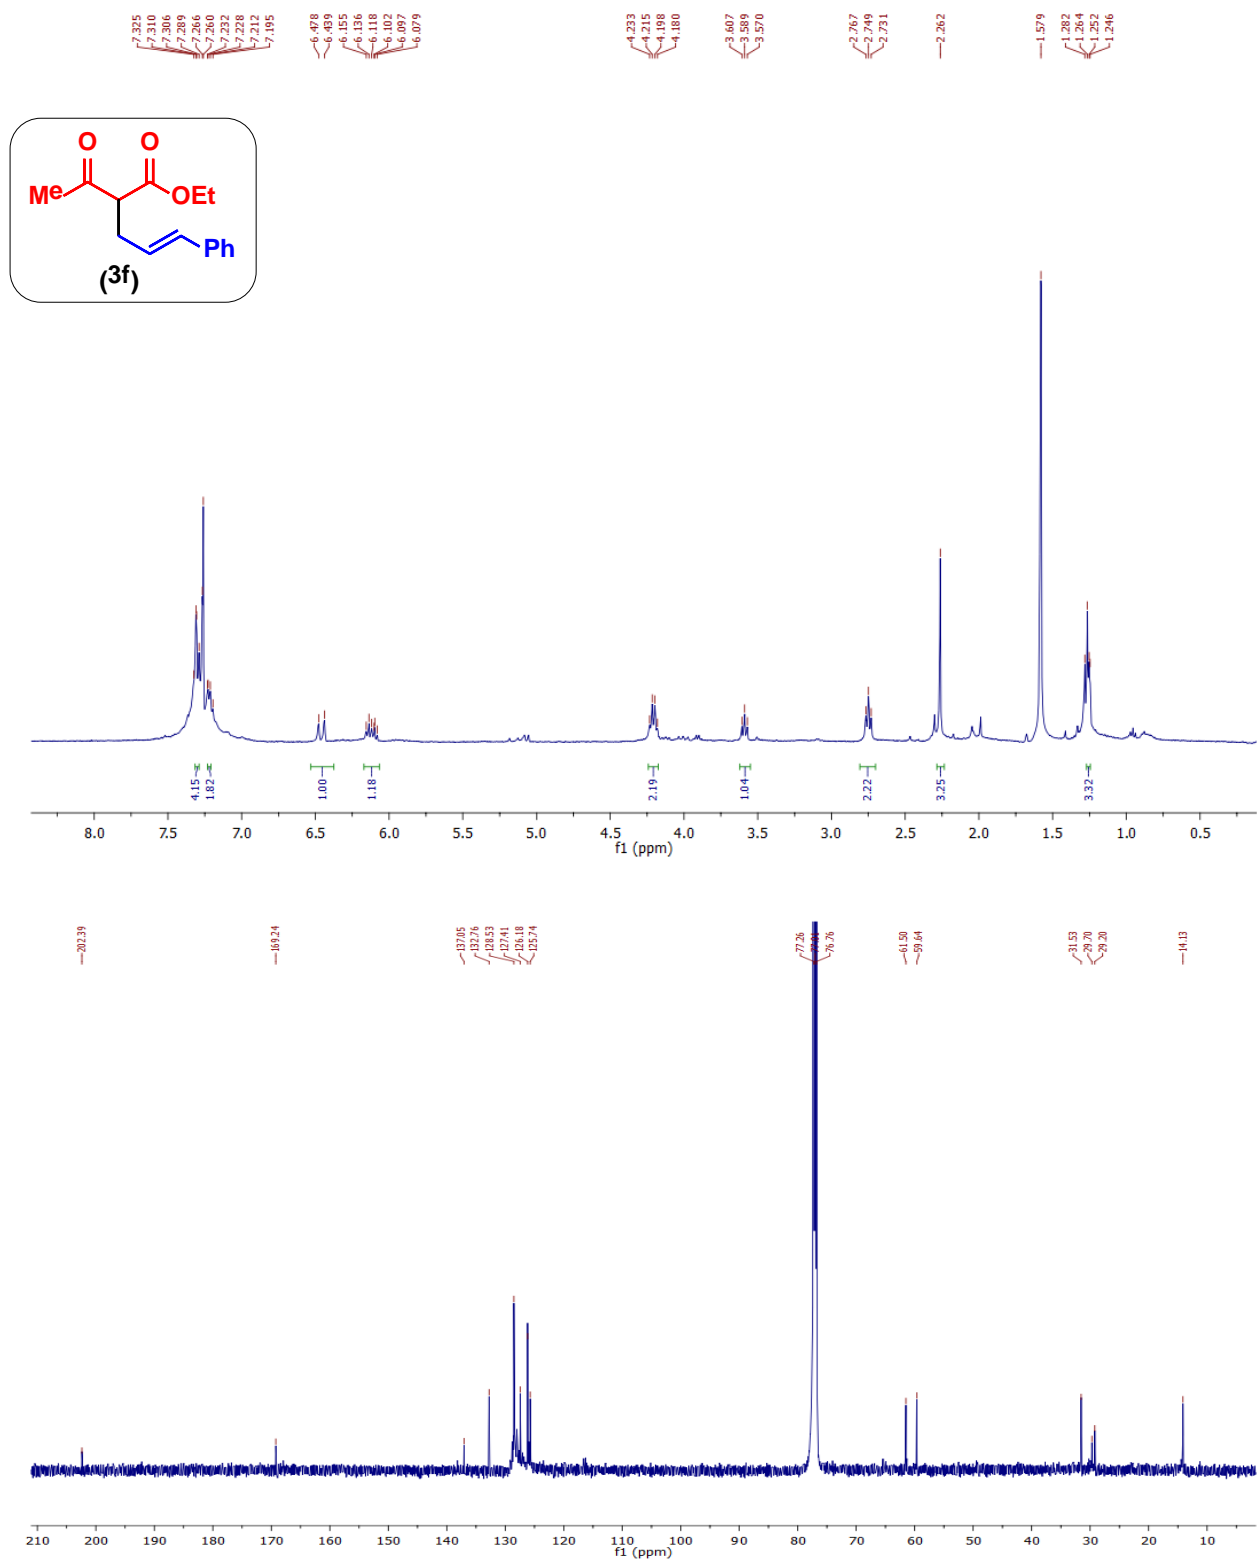

Figure S8 <sup>1</sup>H and <sup>13</sup>C NMR spectra of **3f**



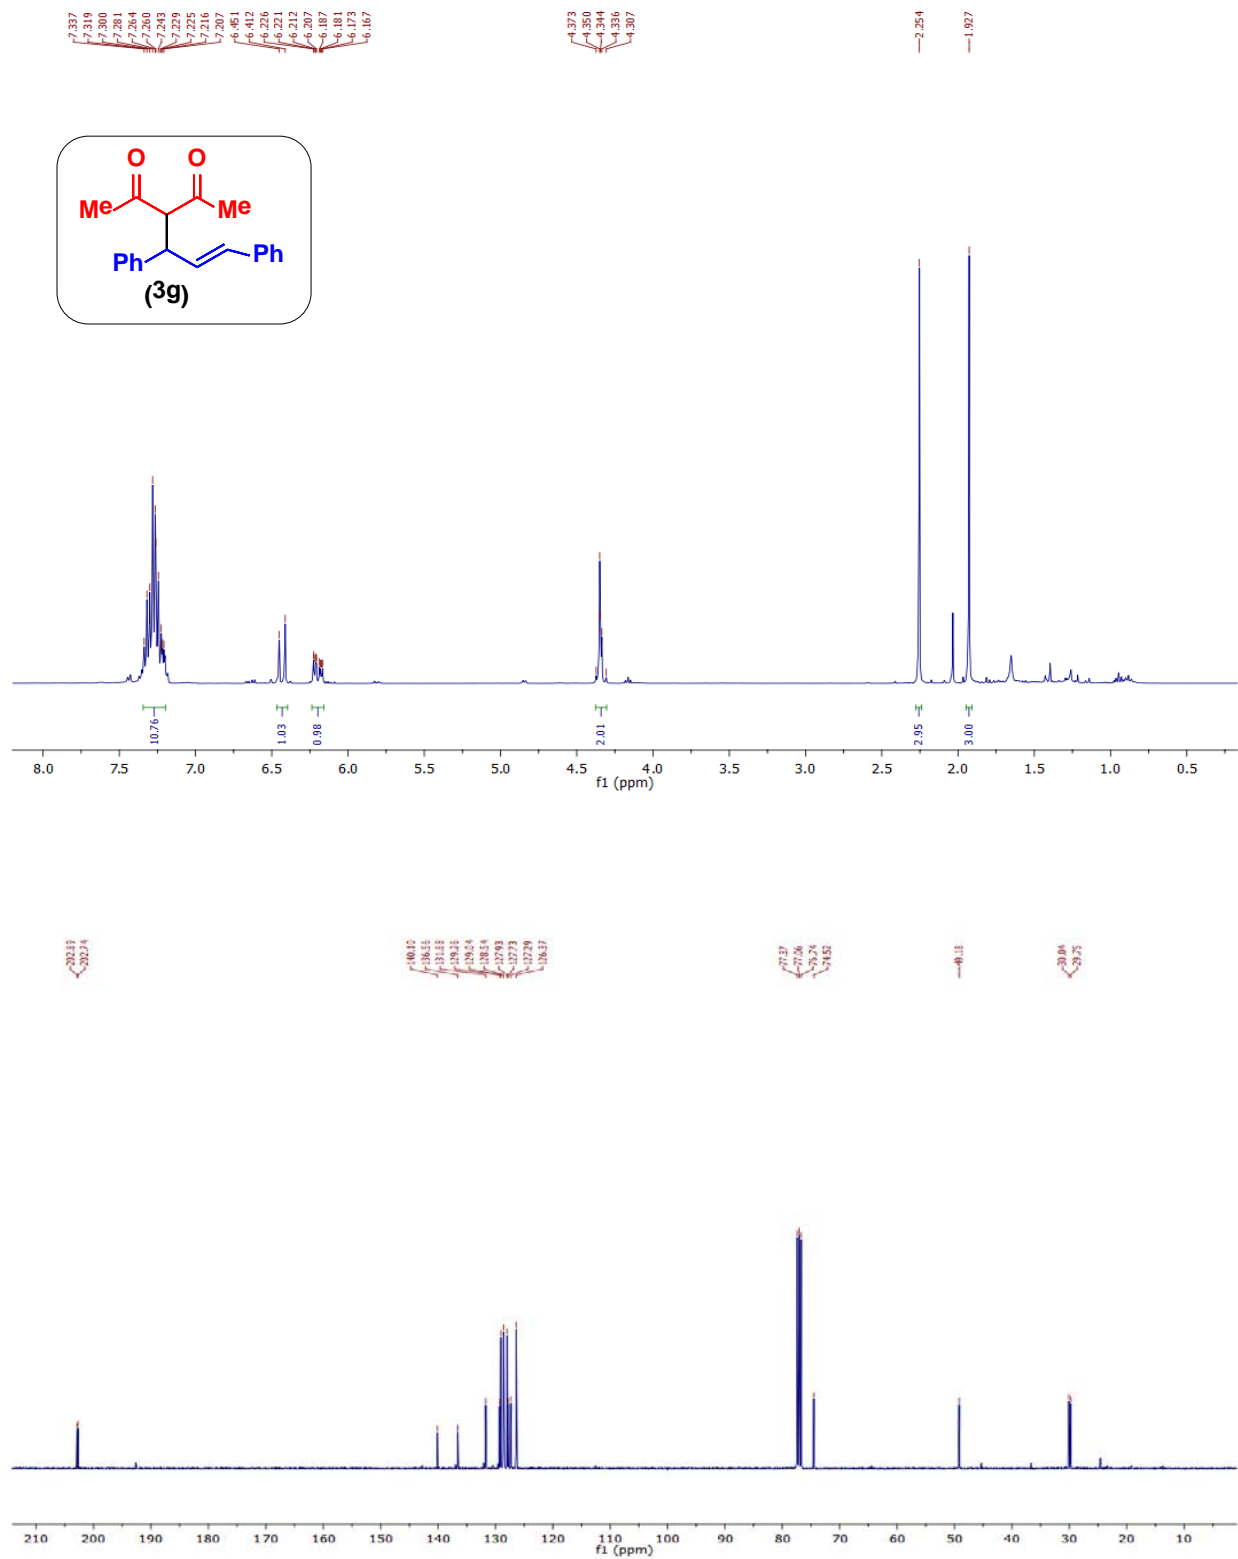

Figure S9 <sup>1</sup>H and <sup>13</sup>C NMR spectra of **3g**

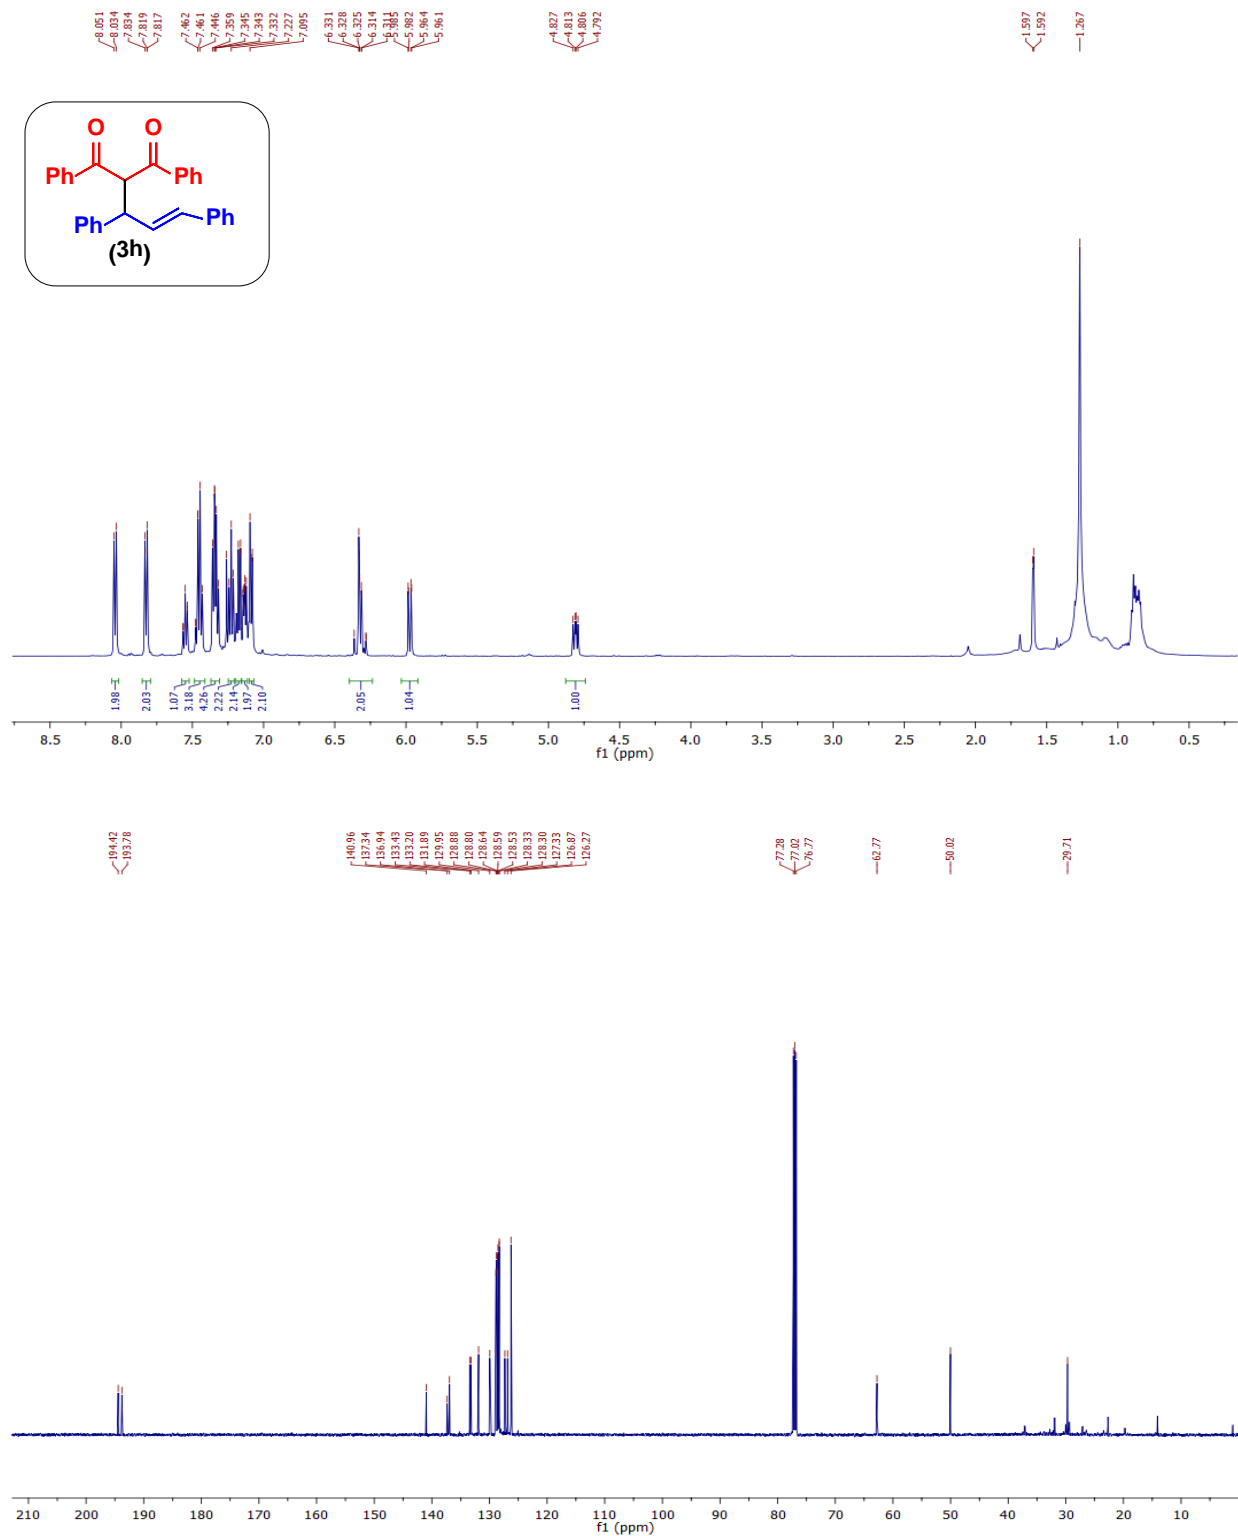

Figure S10 <sup>1</sup>H and <sup>13</sup>C NMR spectra of **3h**

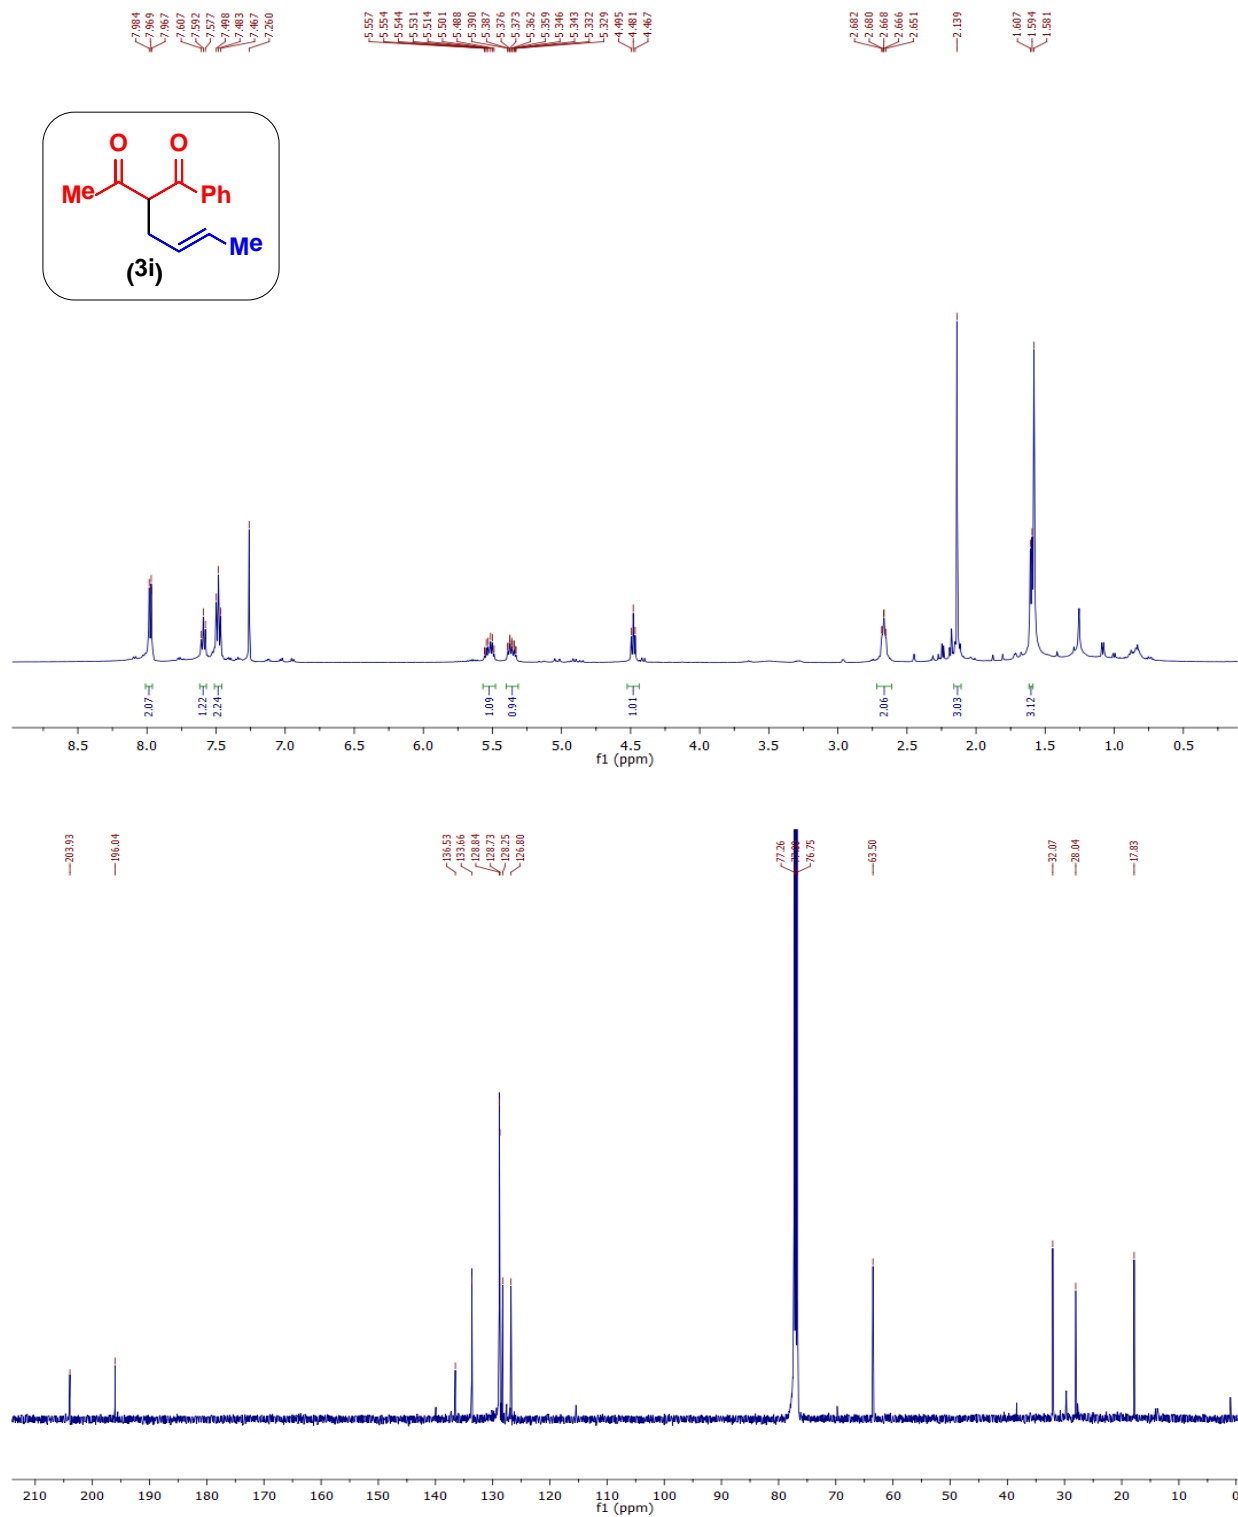

Figure S11 <sup>1</sup>H and <sup>13</sup>C NMR spectra of **3i**

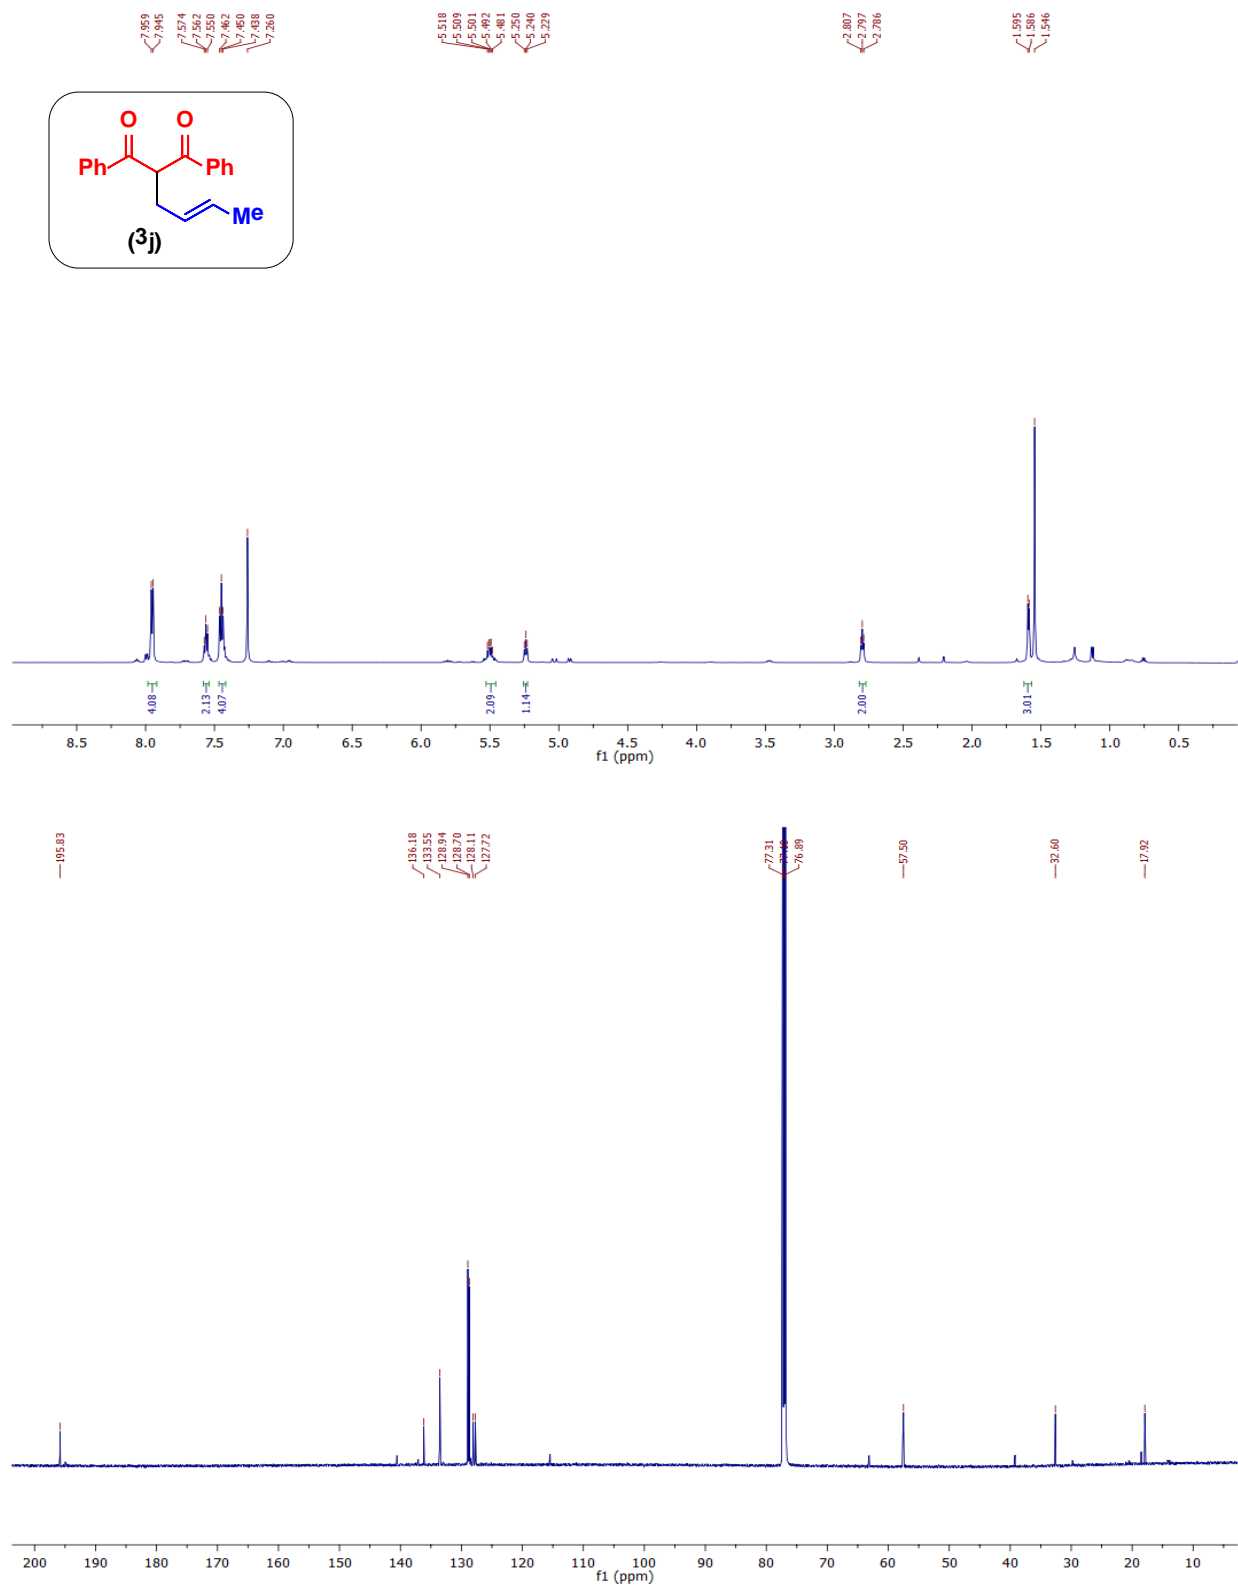

Figure S12 <sup>1</sup>H and <sup>13</sup>C NMR spectra of **3j**

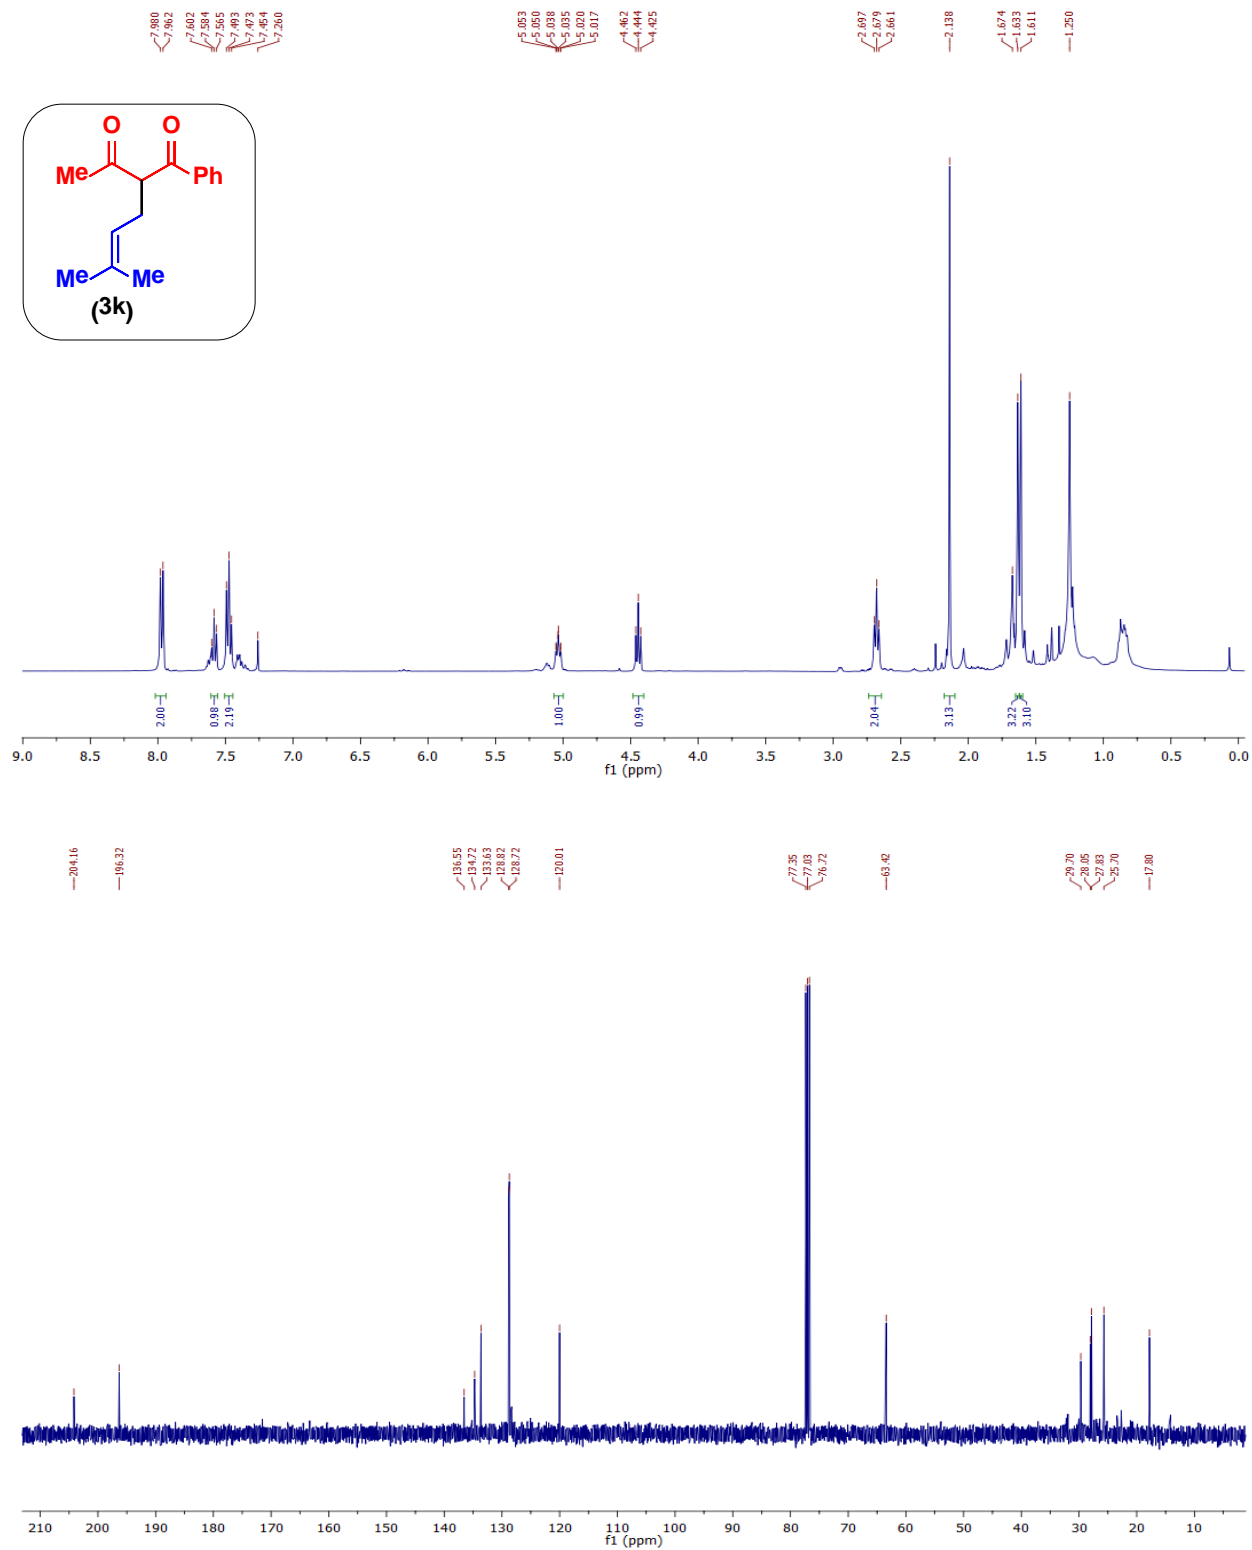

Figure S13 <sup>1</sup>H and <sup>13</sup>C NMR spectra of **3k**

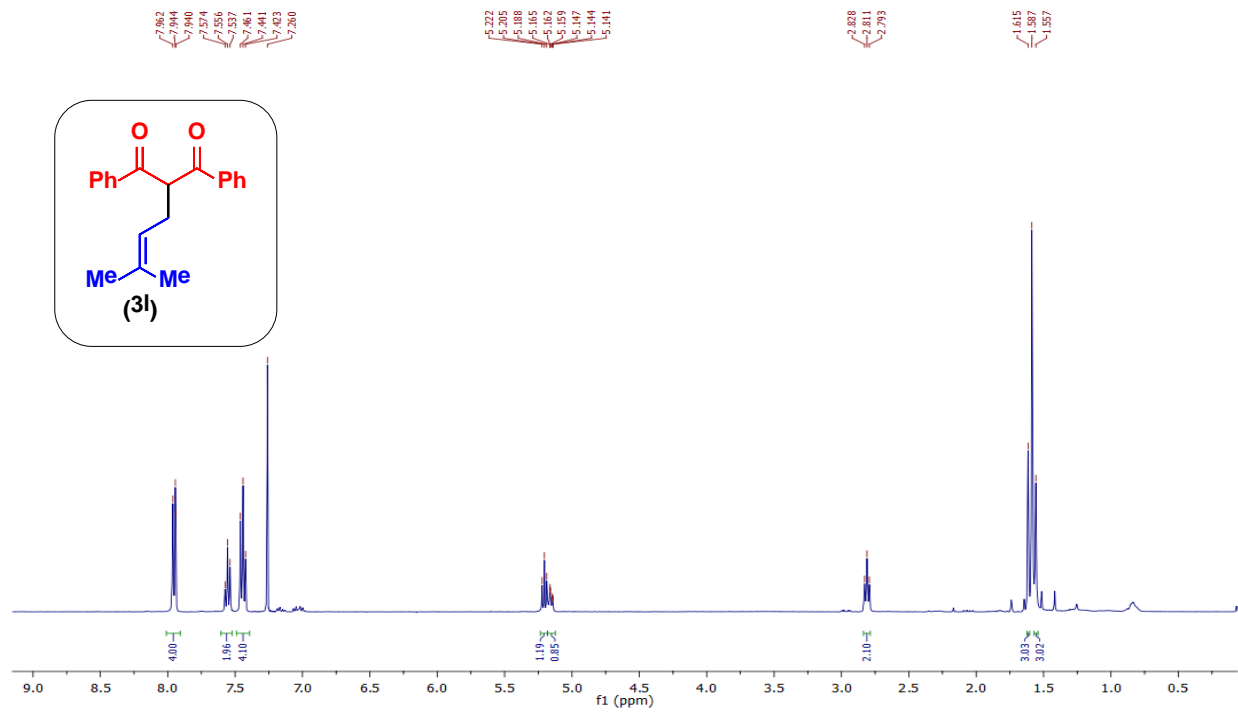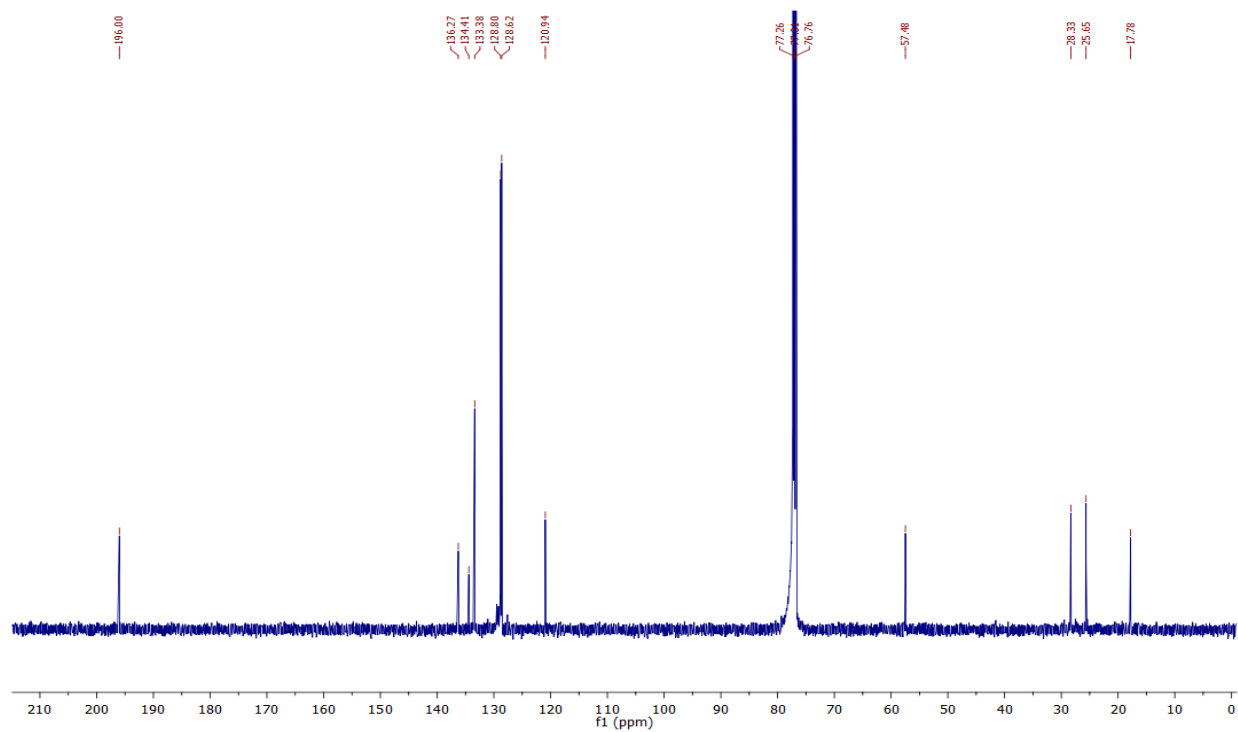

Figure S14 <sup>1</sup>H and <sup>13</sup>C NMR spectra of **3l**

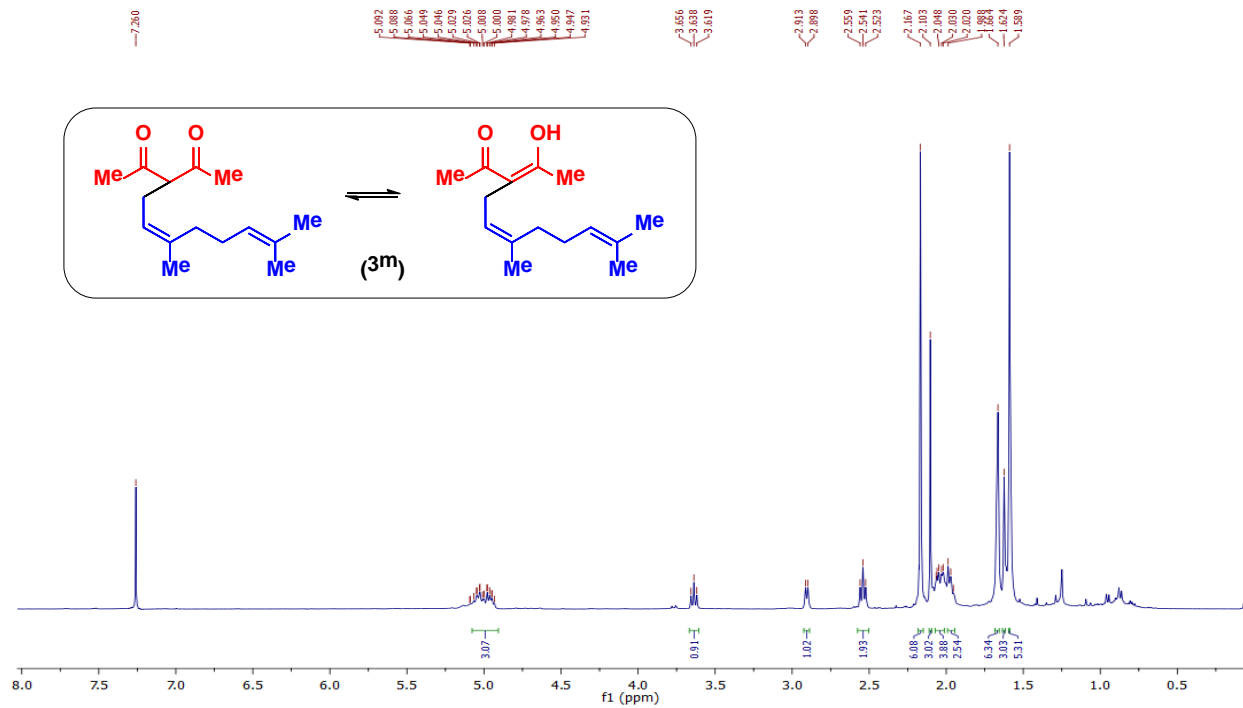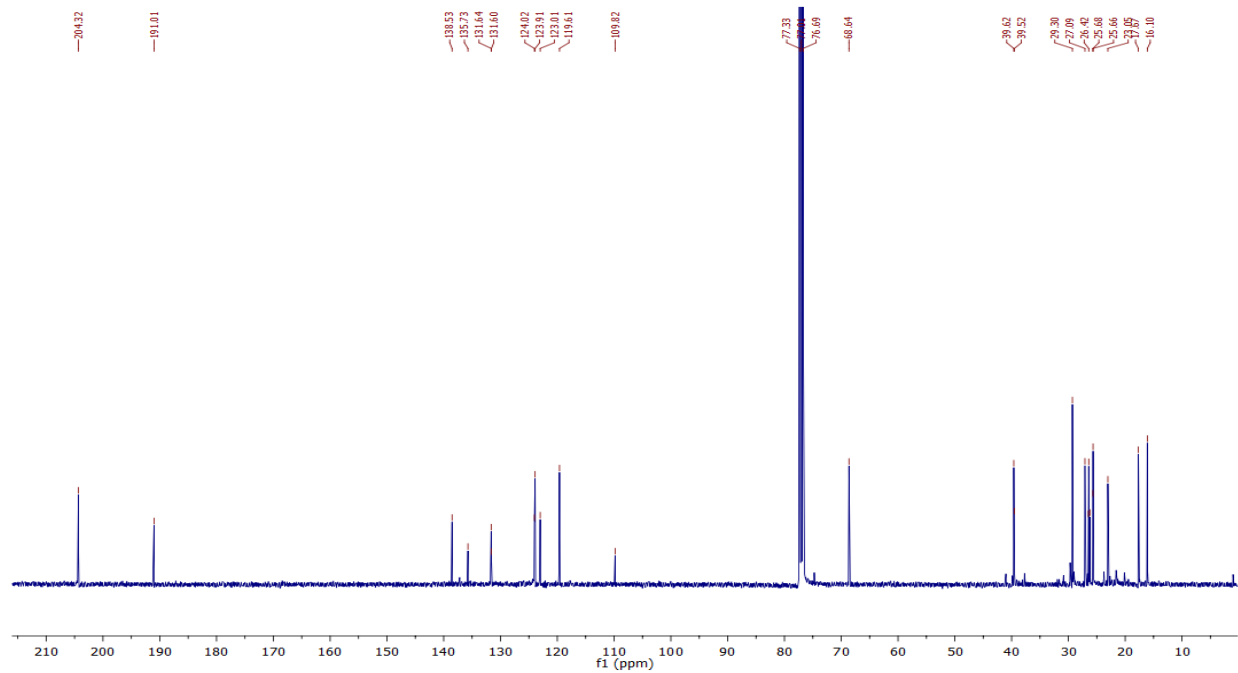

Figure S15 <sup>1</sup>H and <sup>13</sup>C NMR spectra of **3m**

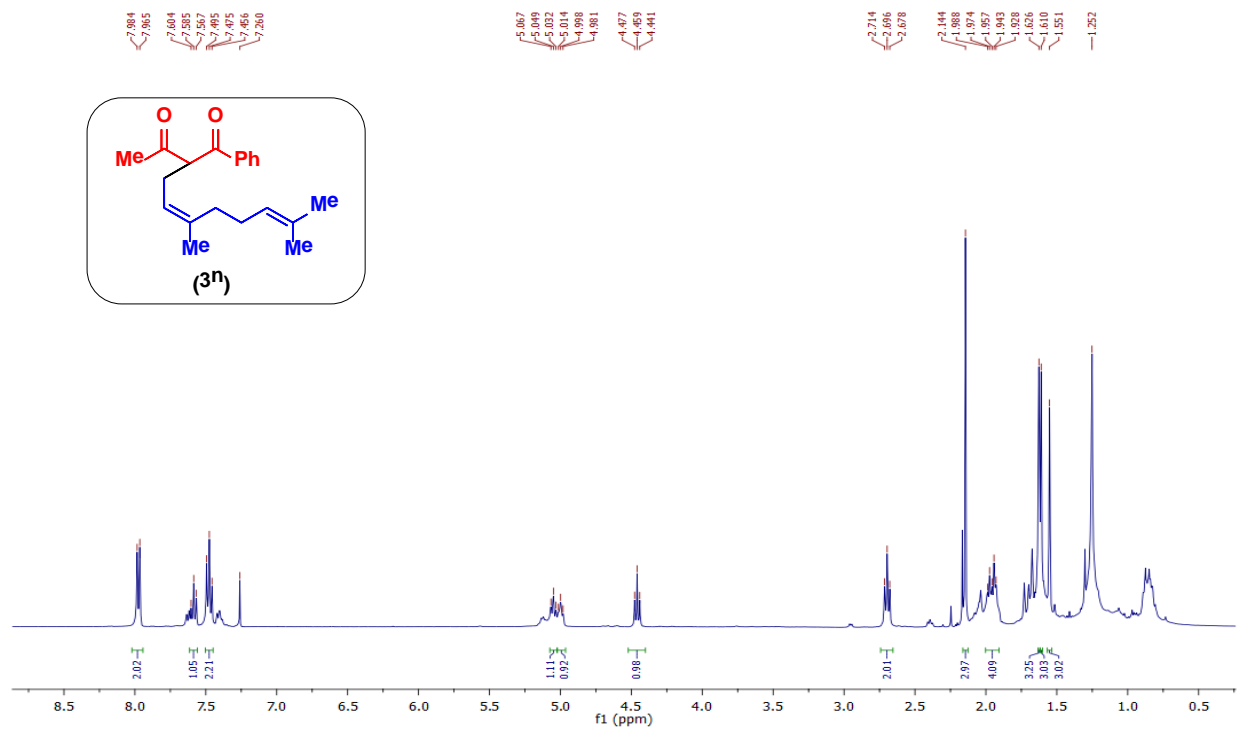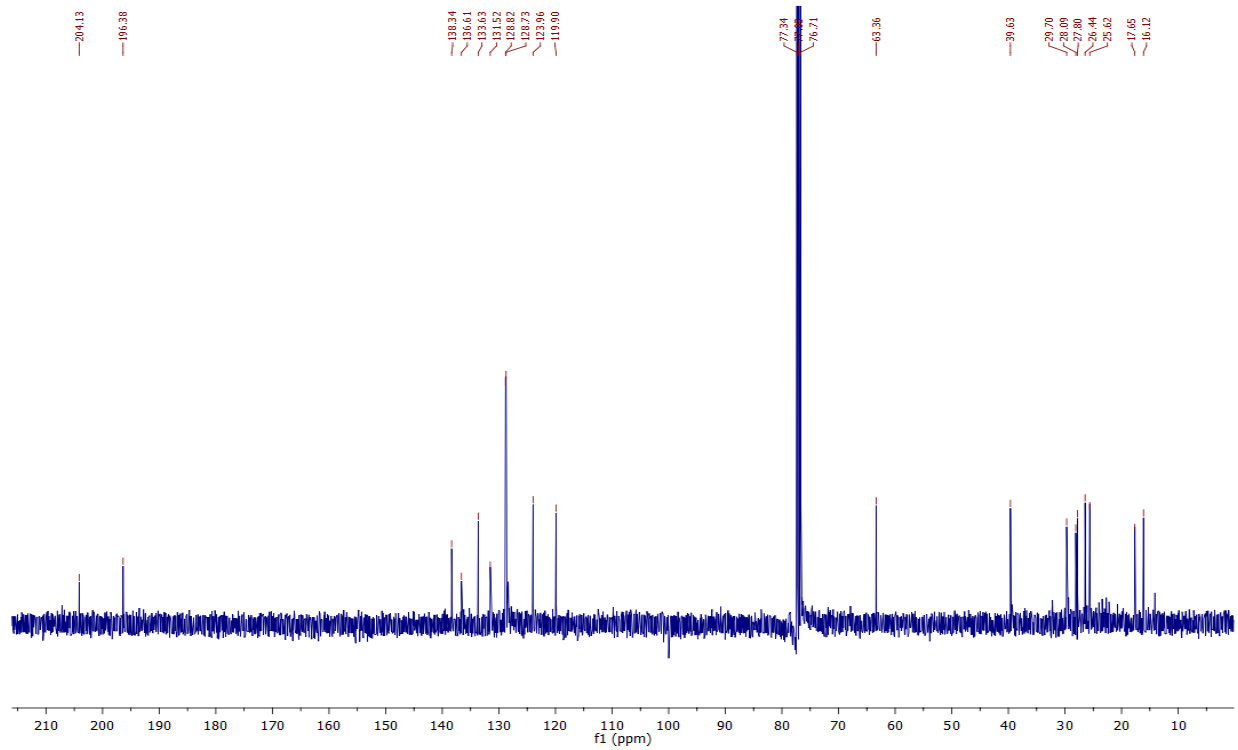

Figure S16 <sup>1</sup>H and <sup>13</sup>C NMR spectra of **3n**



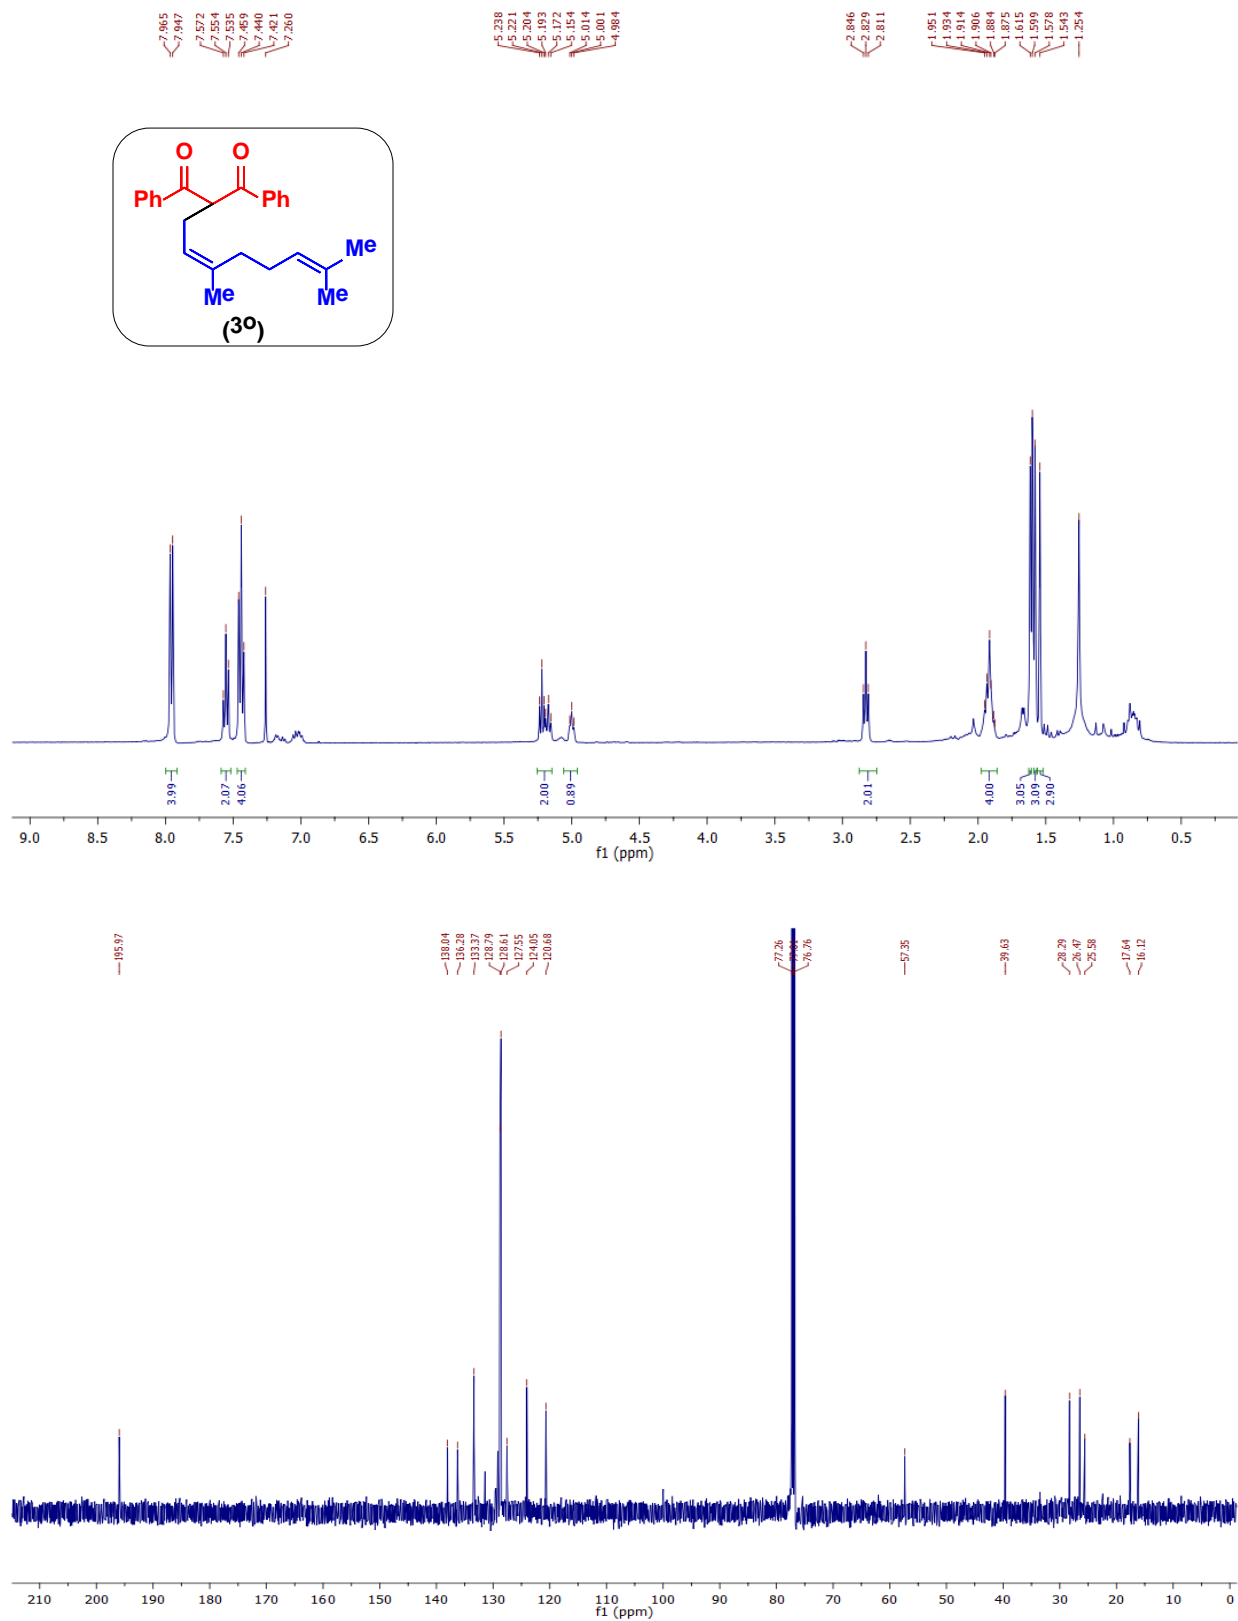

Figure S17 <sup>1</sup>H and <sup>13</sup>C NMR spectra of **30**

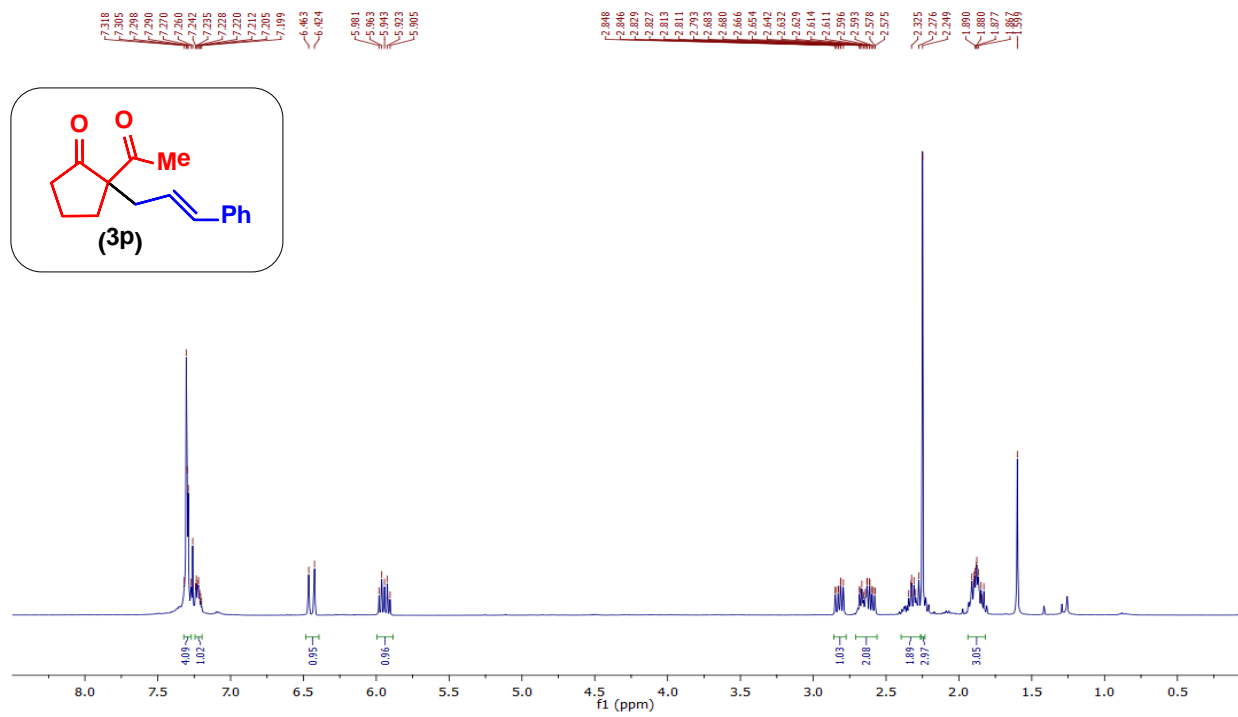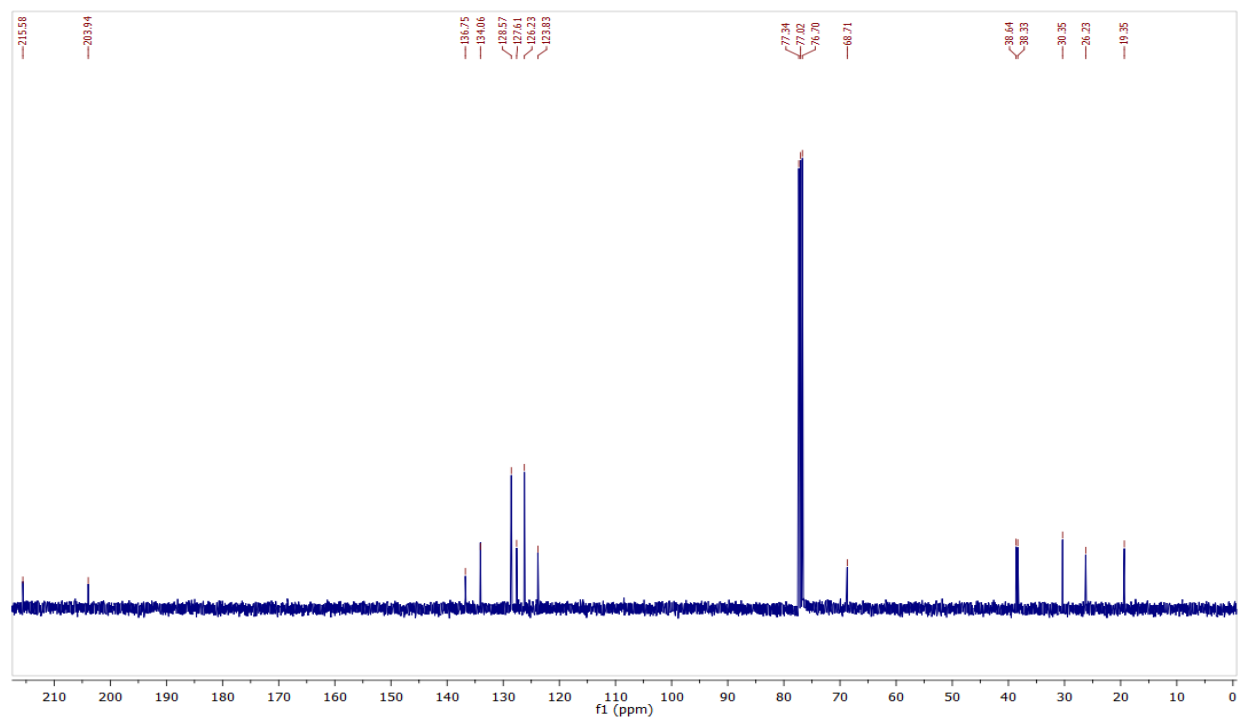

Figure S18 <sup>1</sup>H and <sup>13</sup>C NMR spectra of **3p**

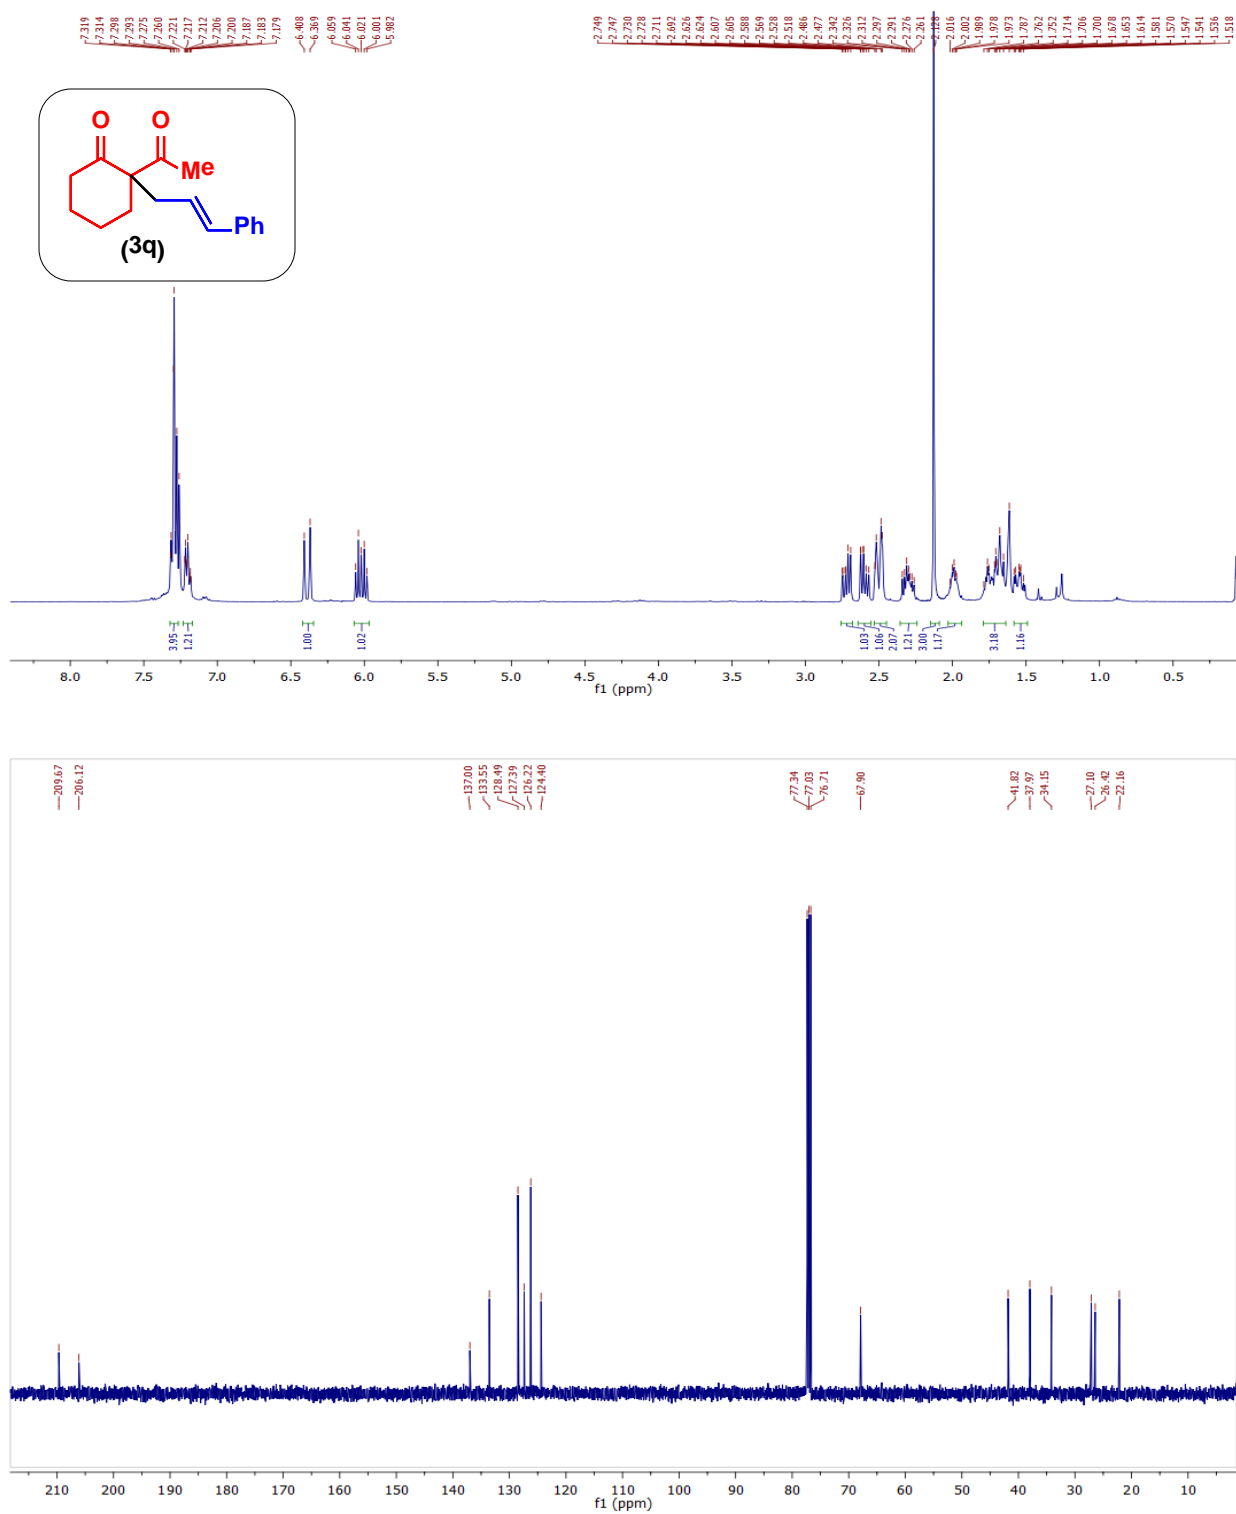

Figure S19 <sup>1</sup>H and <sup>13</sup>C NMR spectra of **3q**

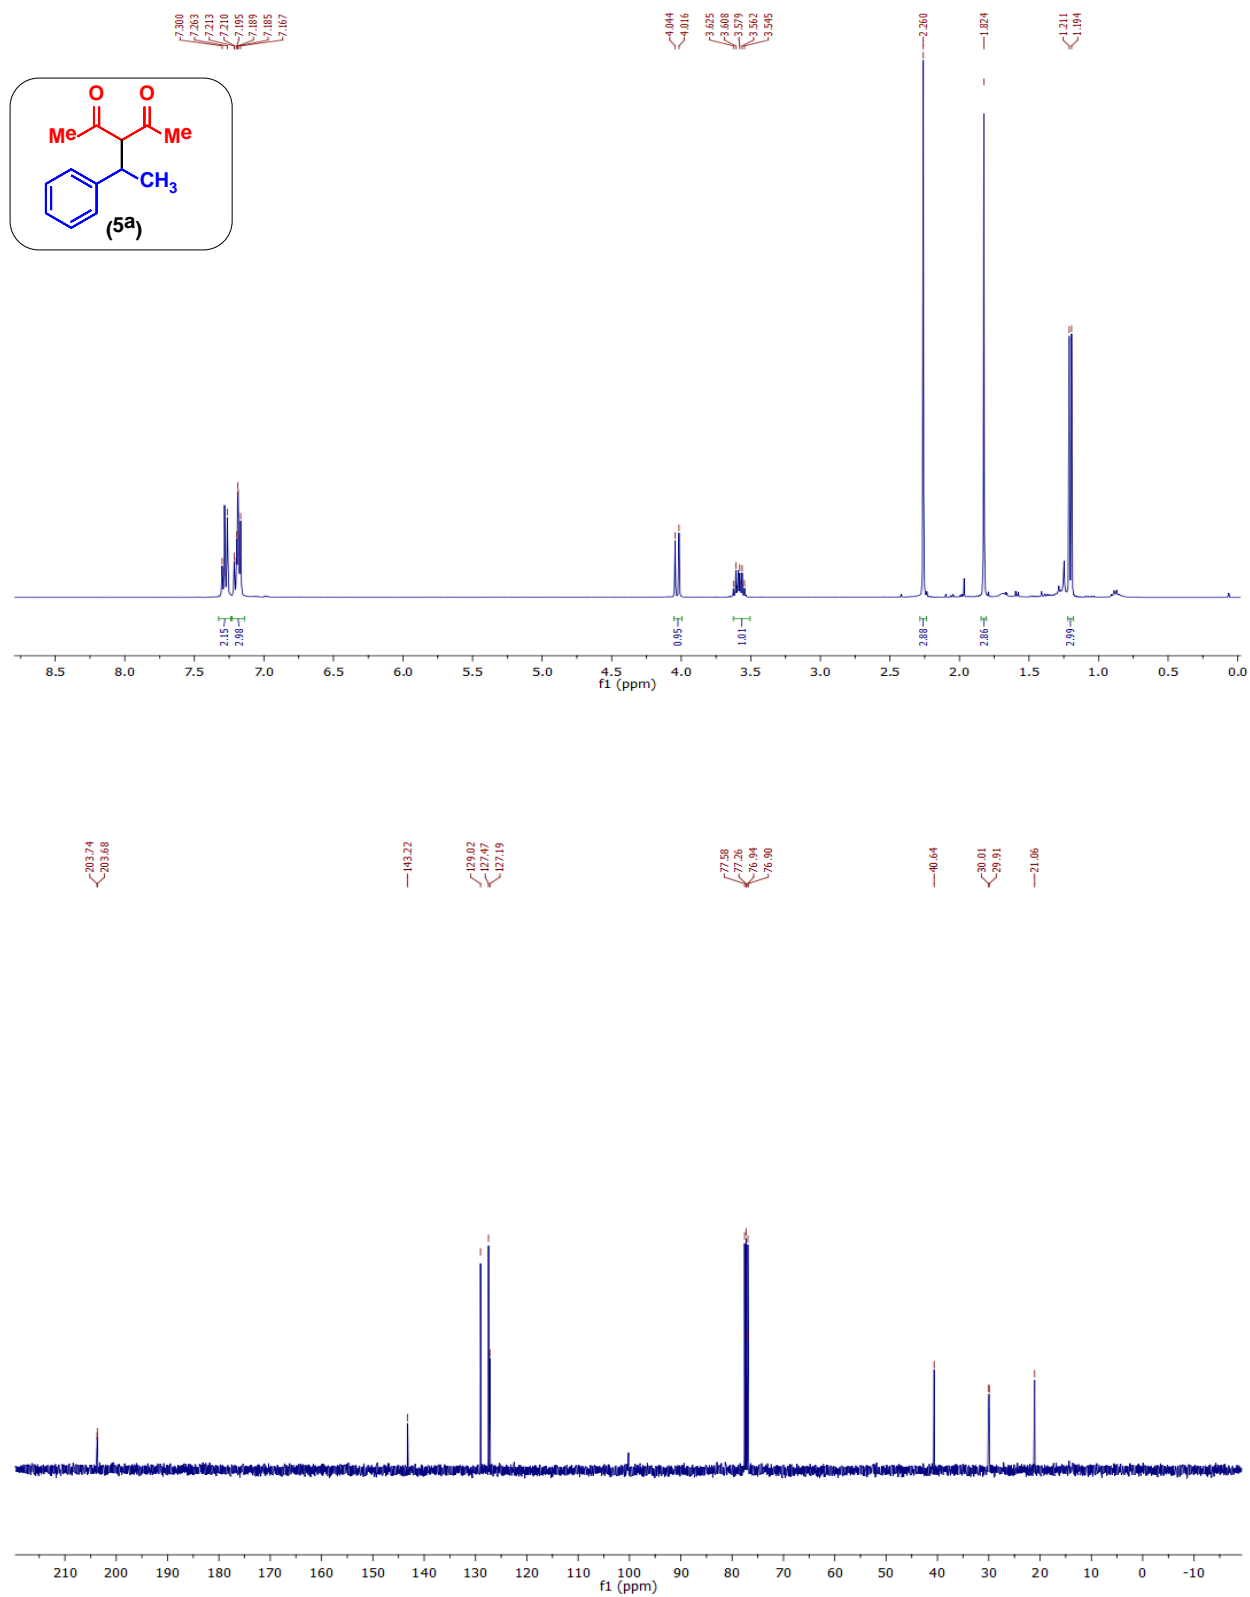

Figure S20 <sup>1</sup>H and <sup>13</sup>C NMR spectra of **5a**

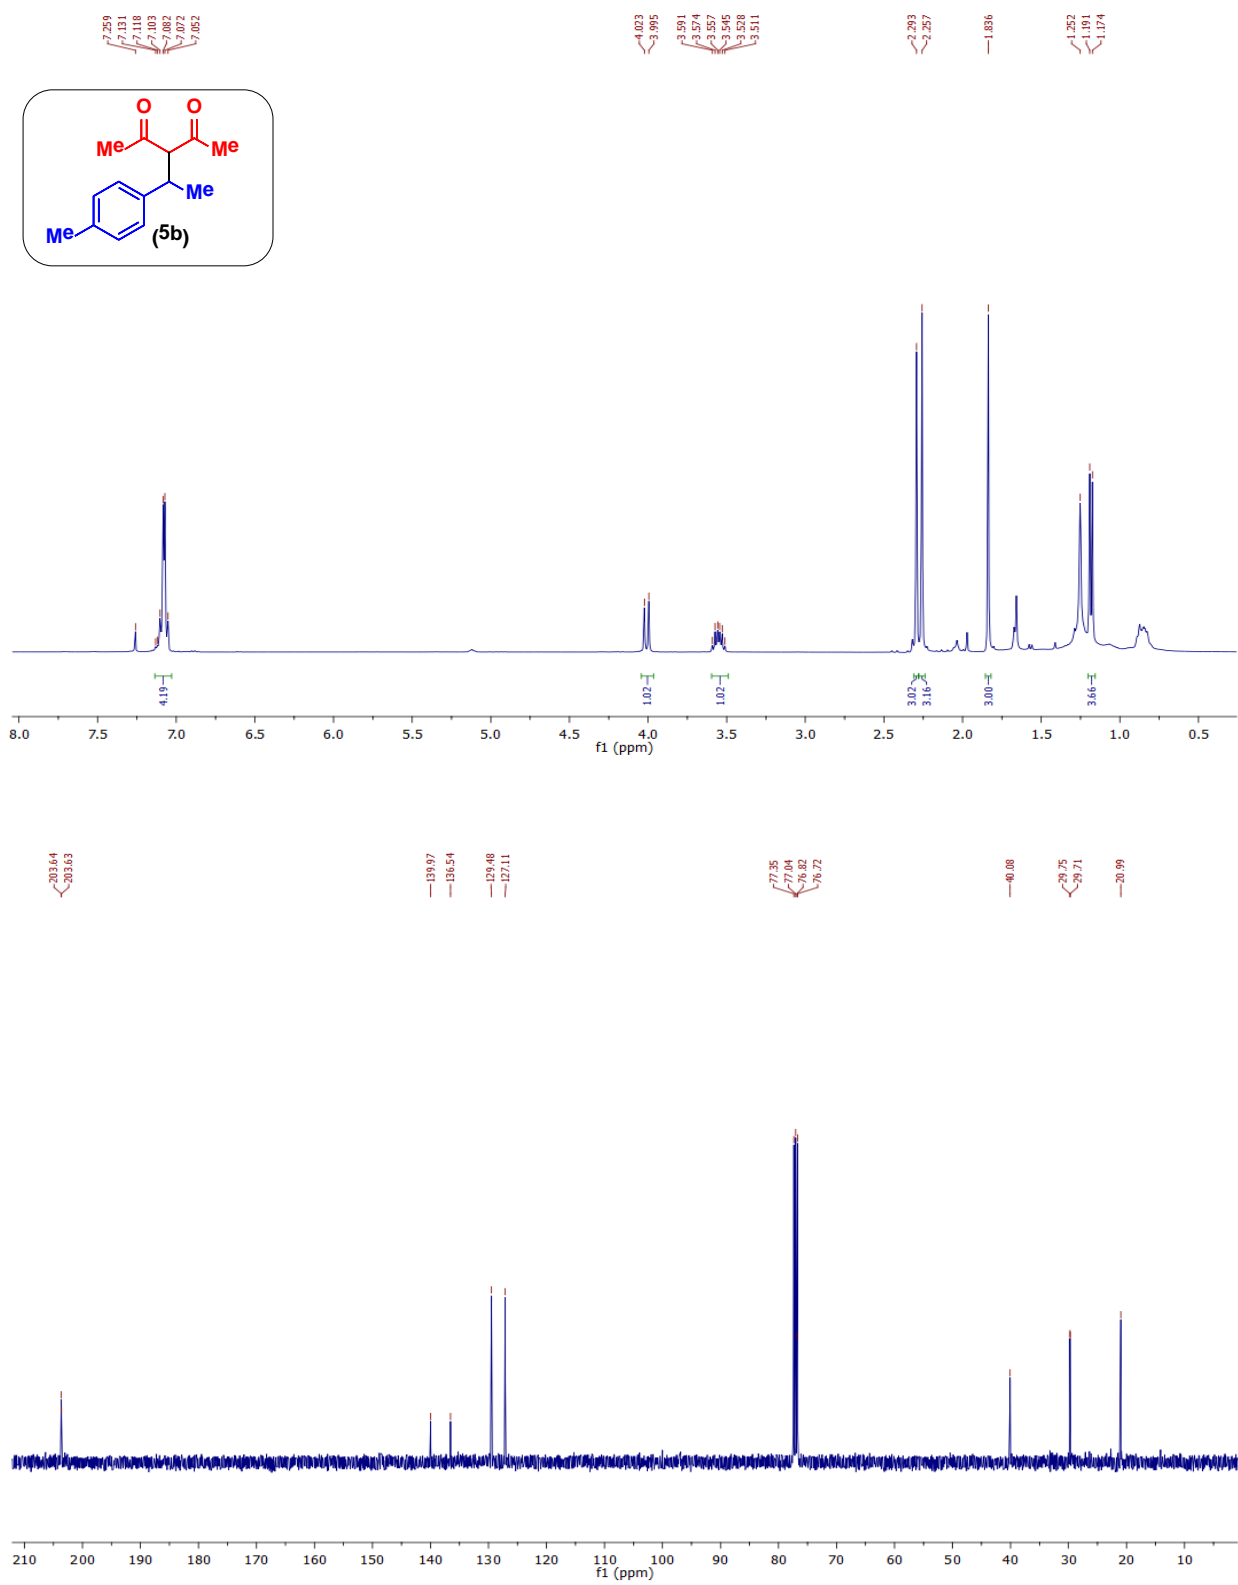

Figure S21 <sup>1</sup>H and <sup>13</sup>C NMR spectra of **5b**

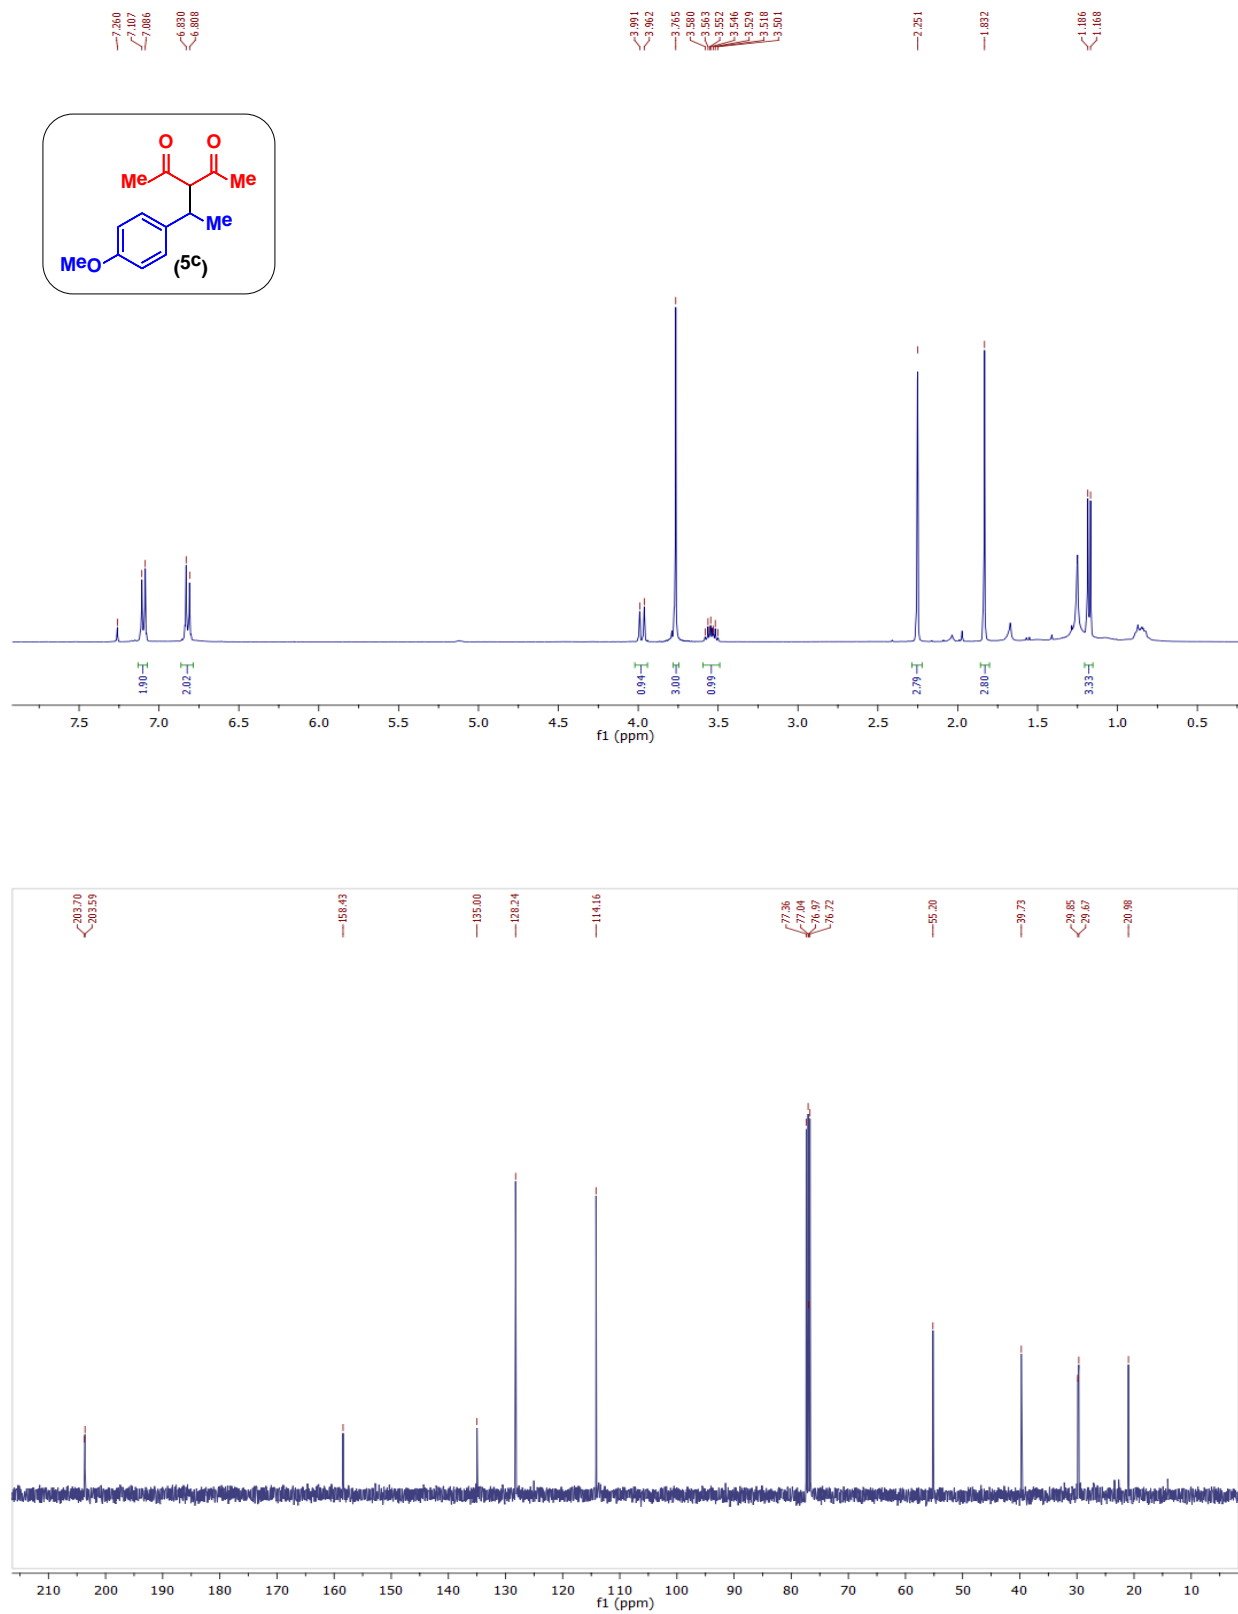

Figure S22 <sup>1</sup>H and <sup>13</sup>C NMR spectra of **5c**

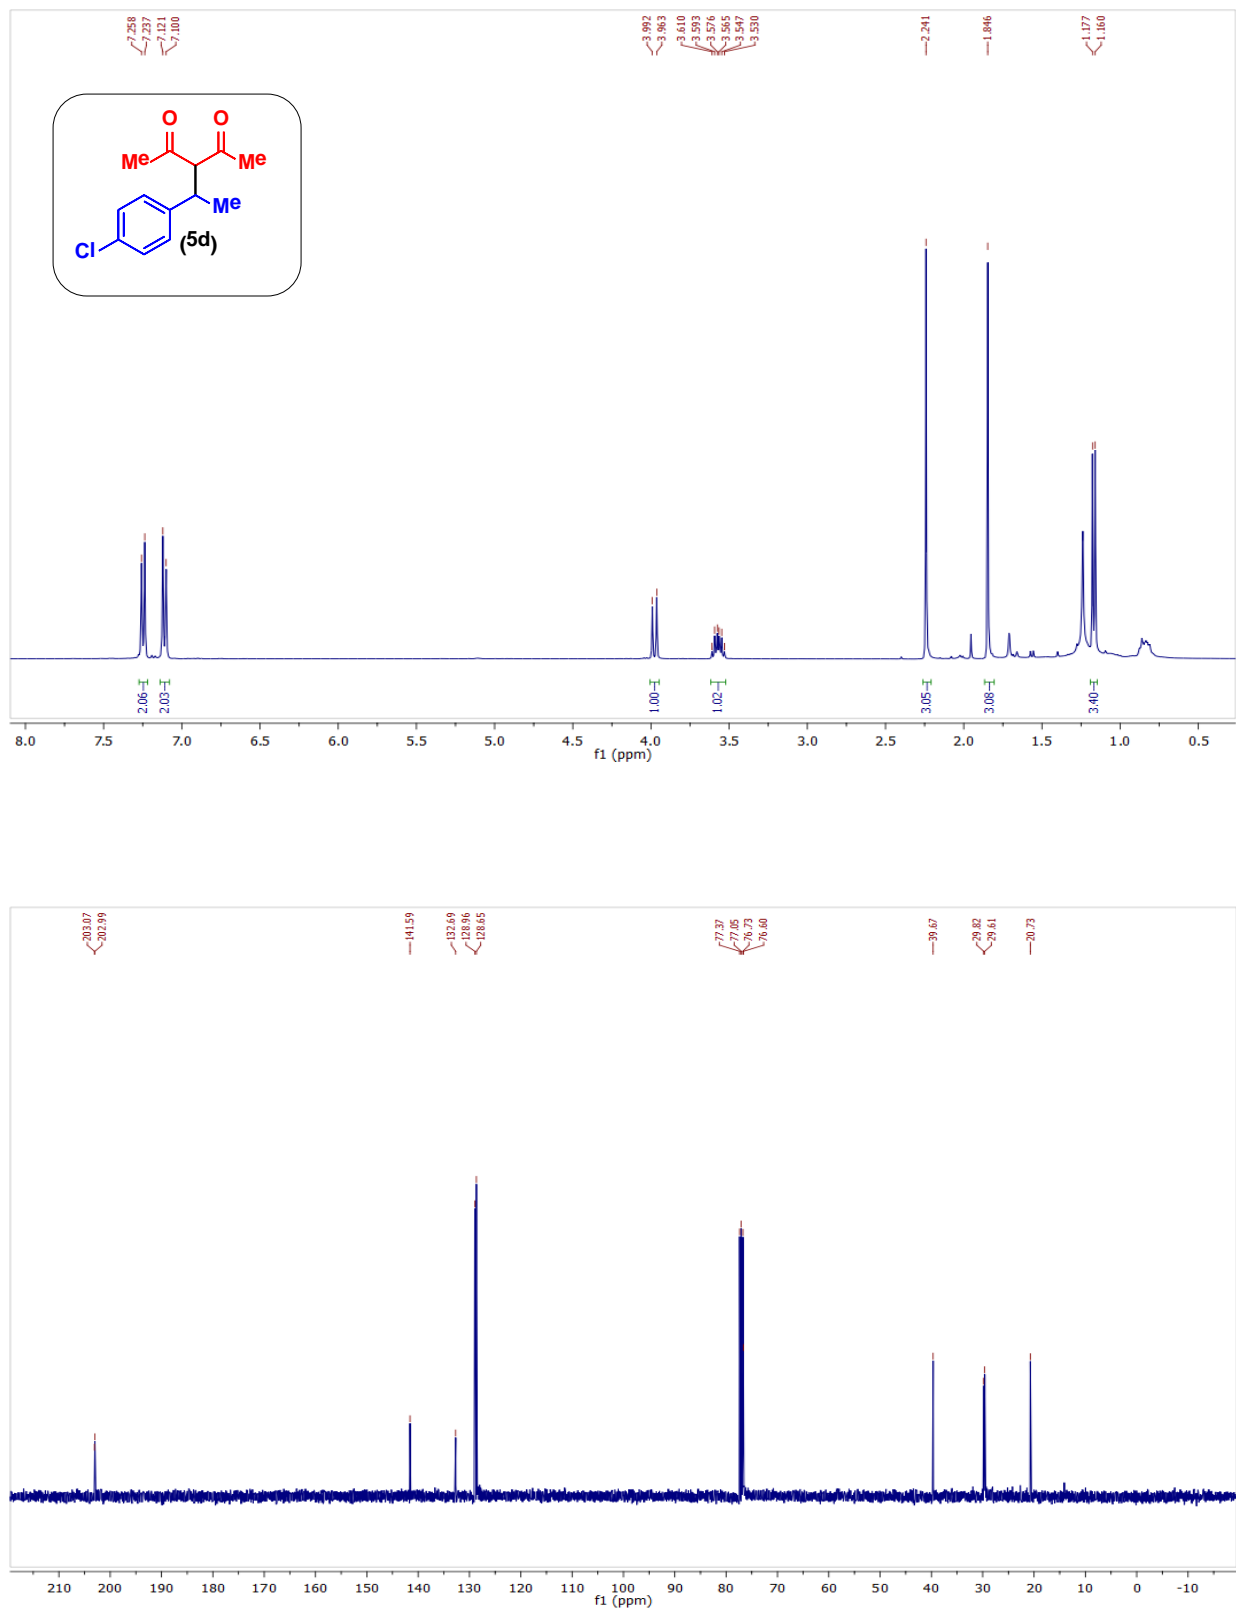

Figure S23 <sup>1</sup>H and <sup>13</sup>C NMR spectra of **5d**

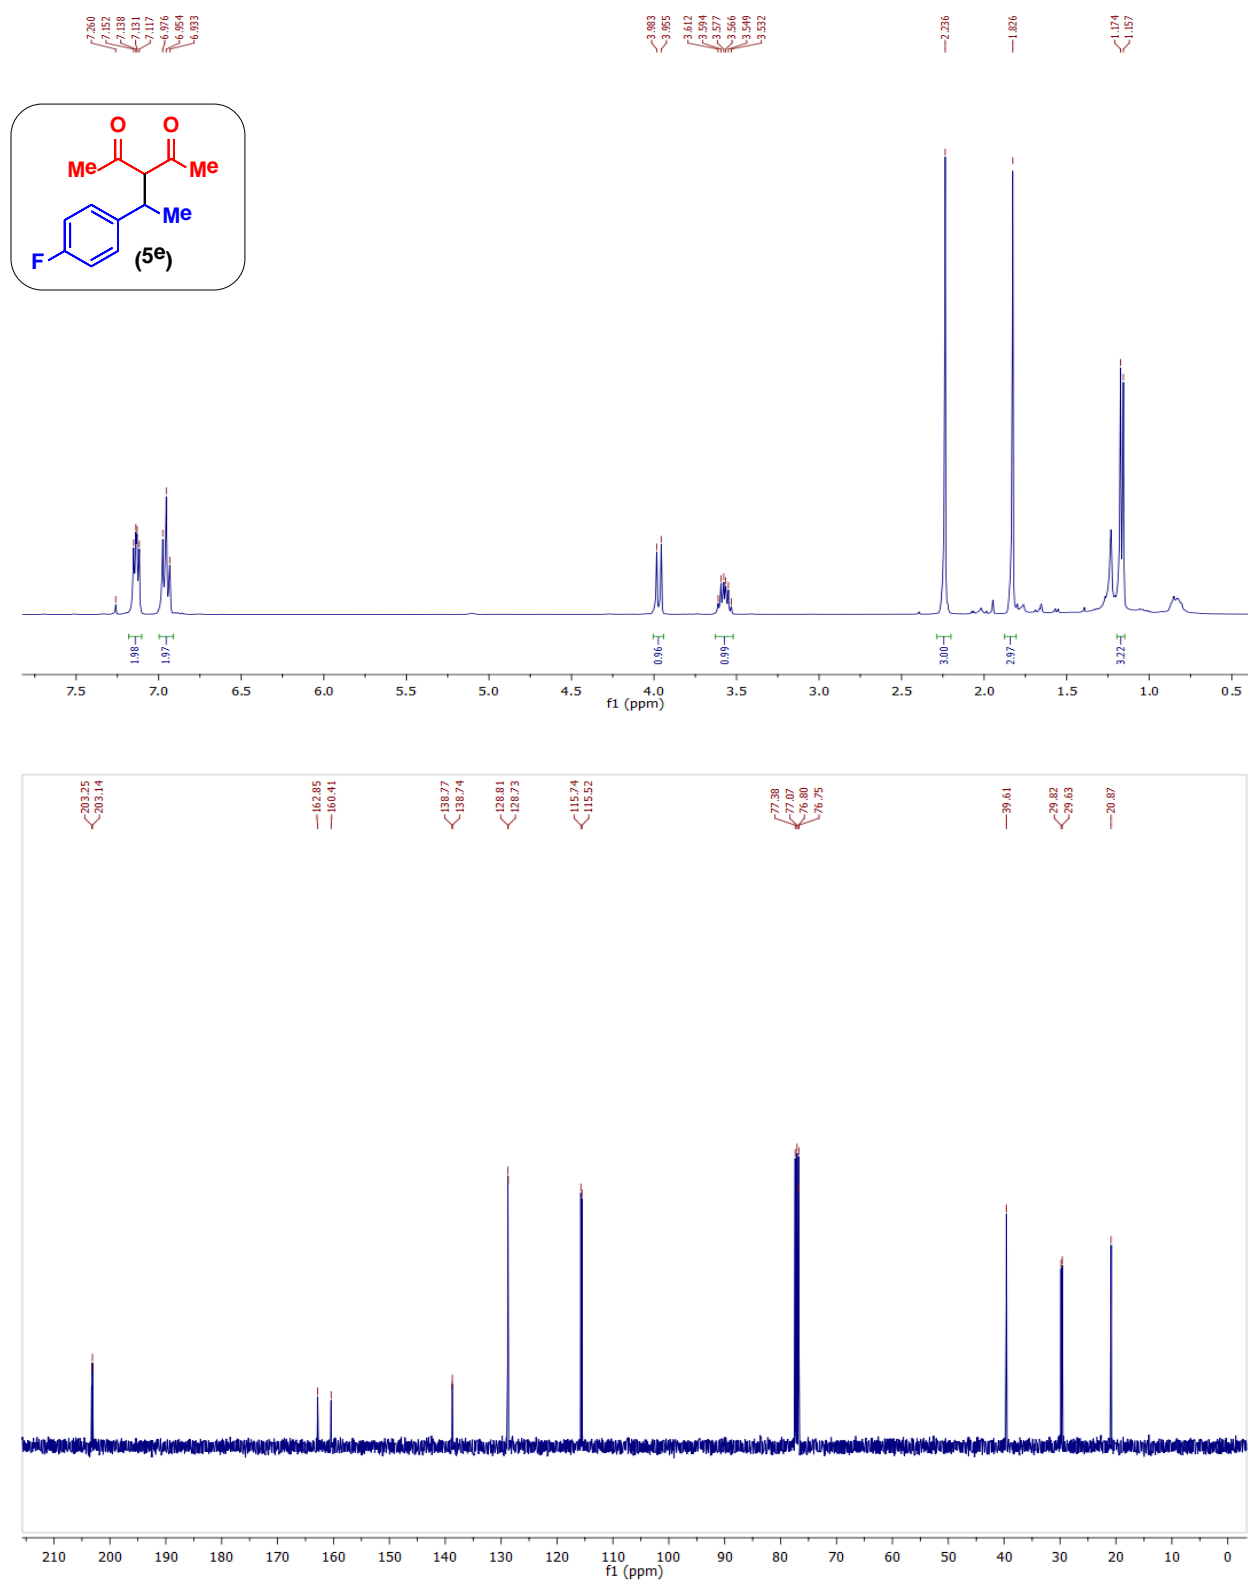

Figure S24 <sup>1</sup>H and <sup>13</sup>C NMR spectra of 5e



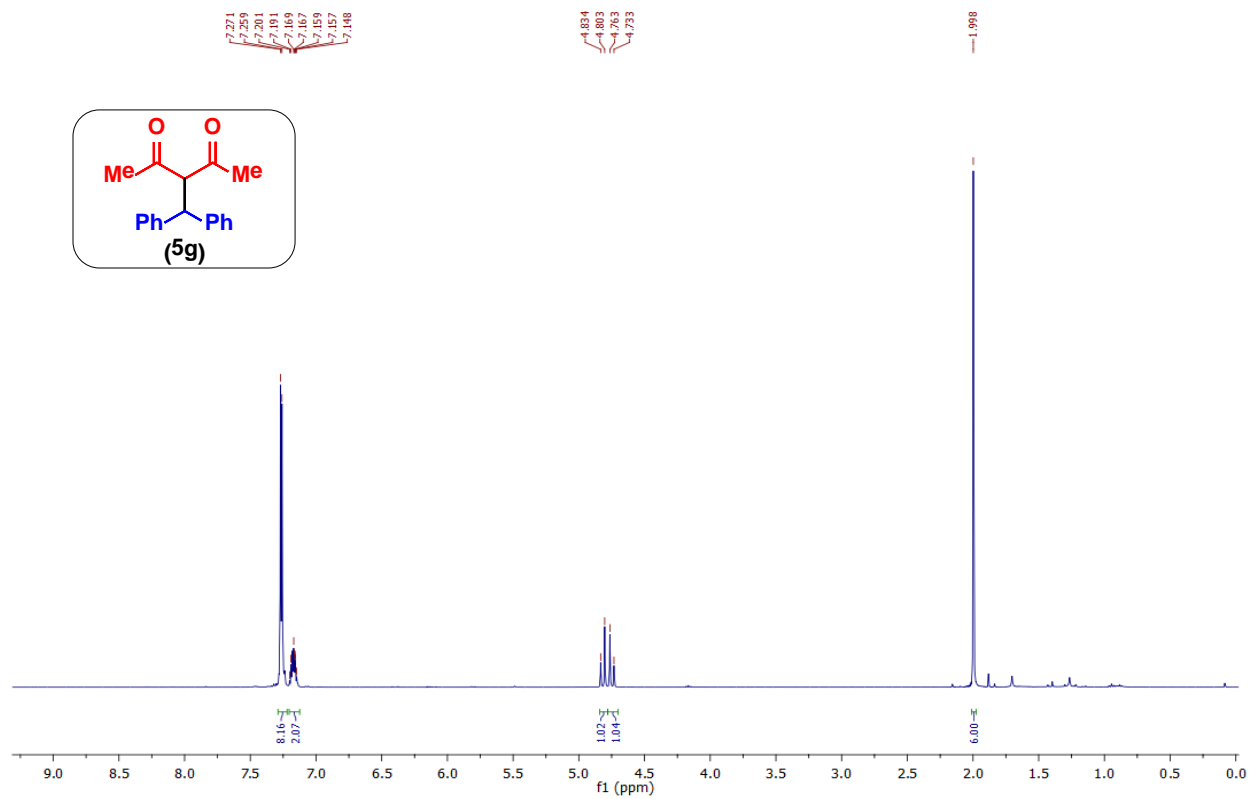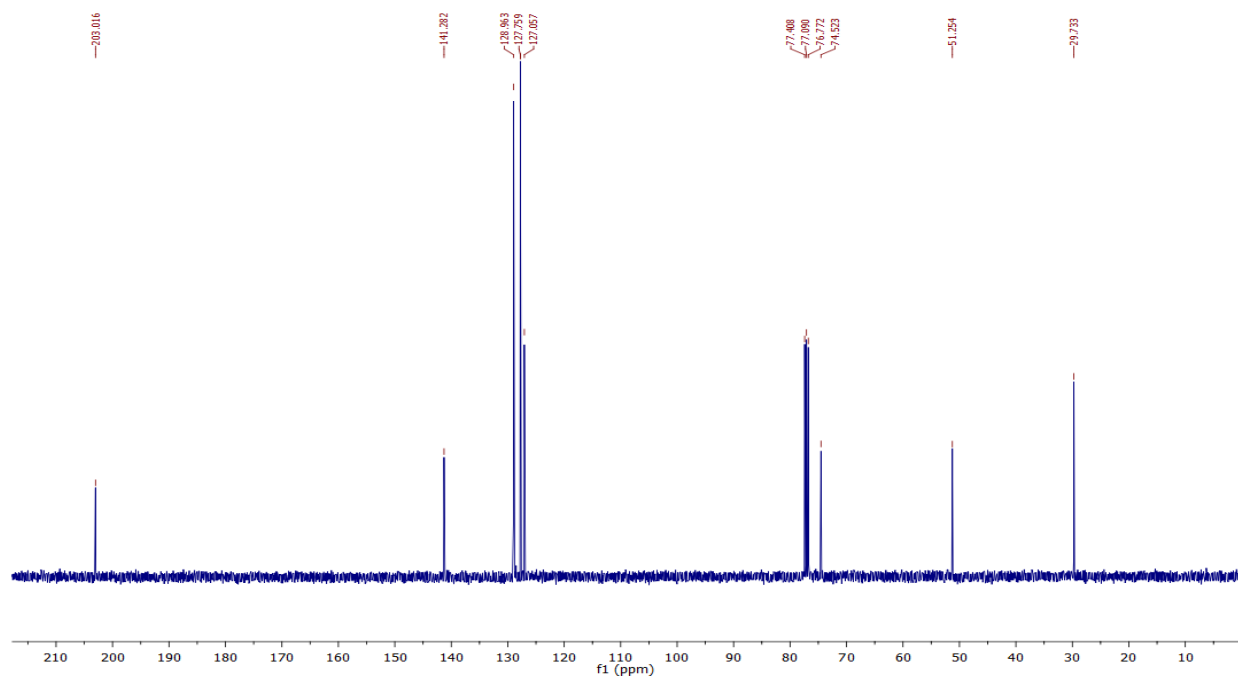

Figure S25  $^1\text{H}$  and  $^{13}\text{C}$  NMR spectra of **5g**

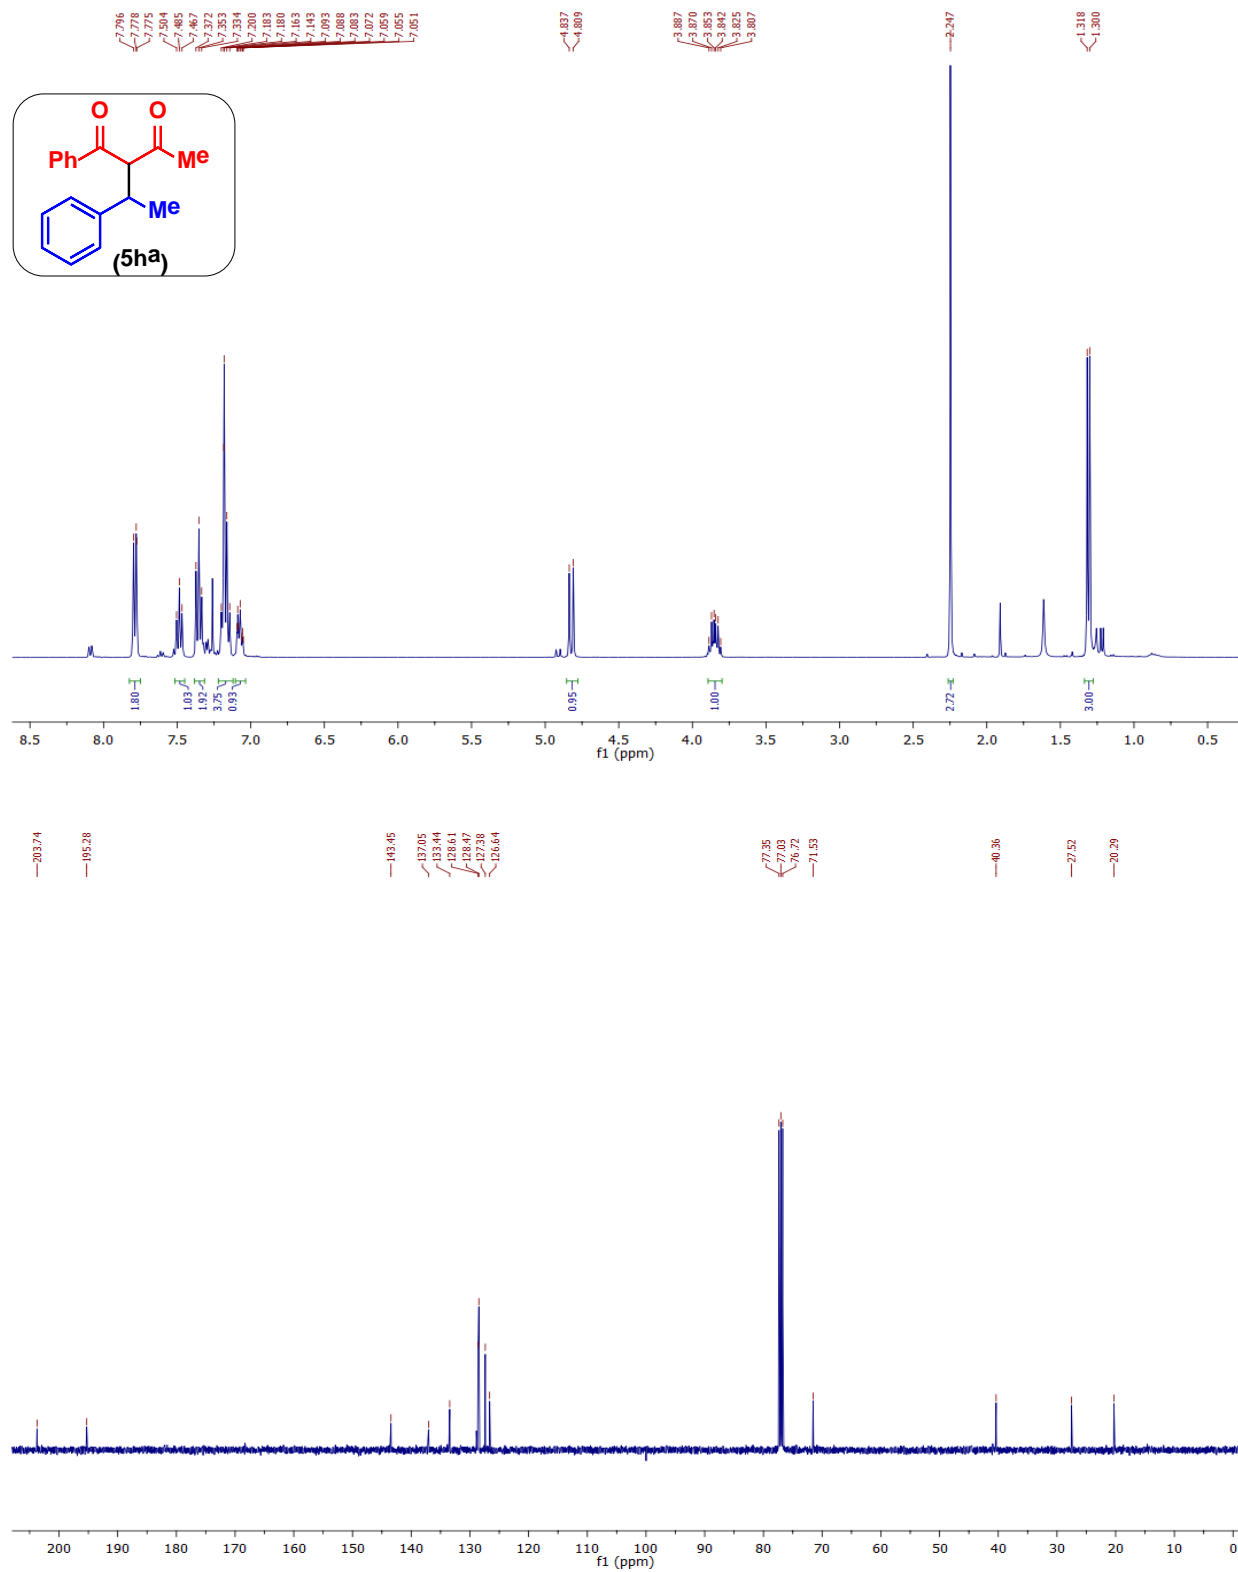

Figure S26 <sup>1</sup>H and <sup>13</sup>C NMR spectra of **5ha**

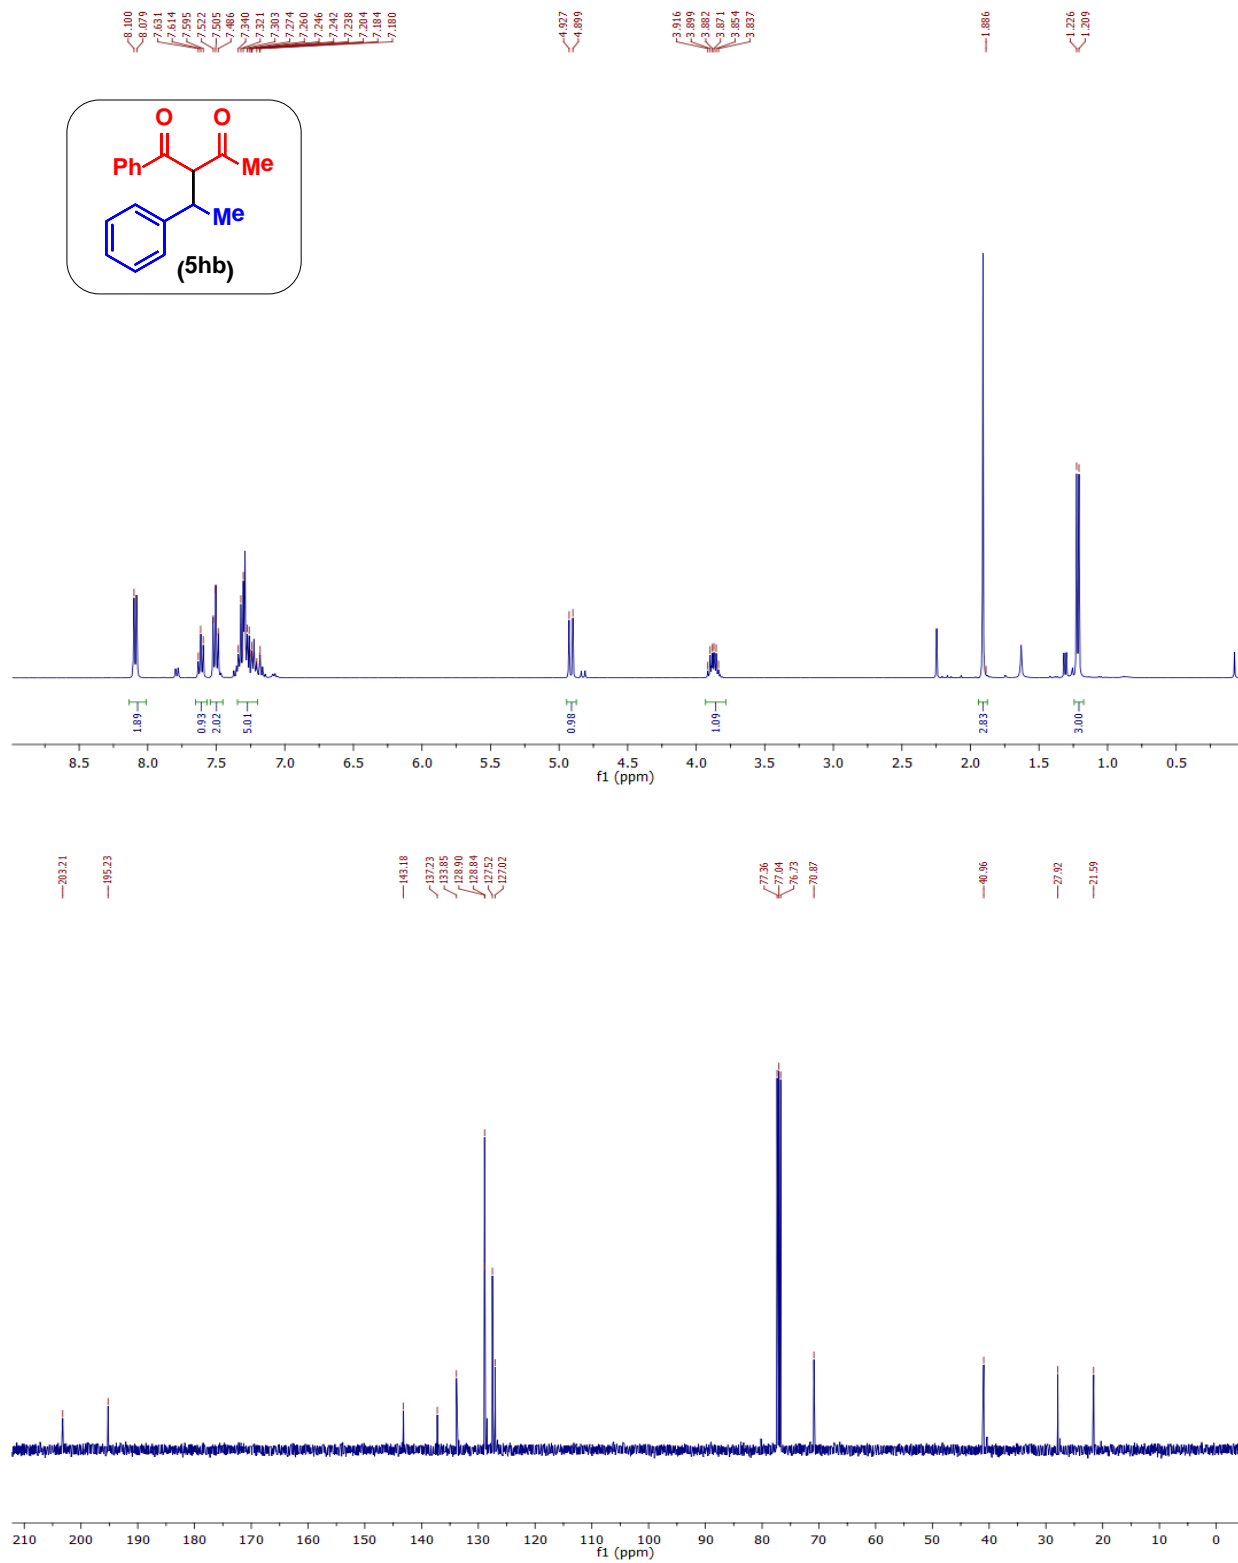

Figure S27 <sup>1</sup>H and <sup>13</sup>C NMR spectra of **5hb**

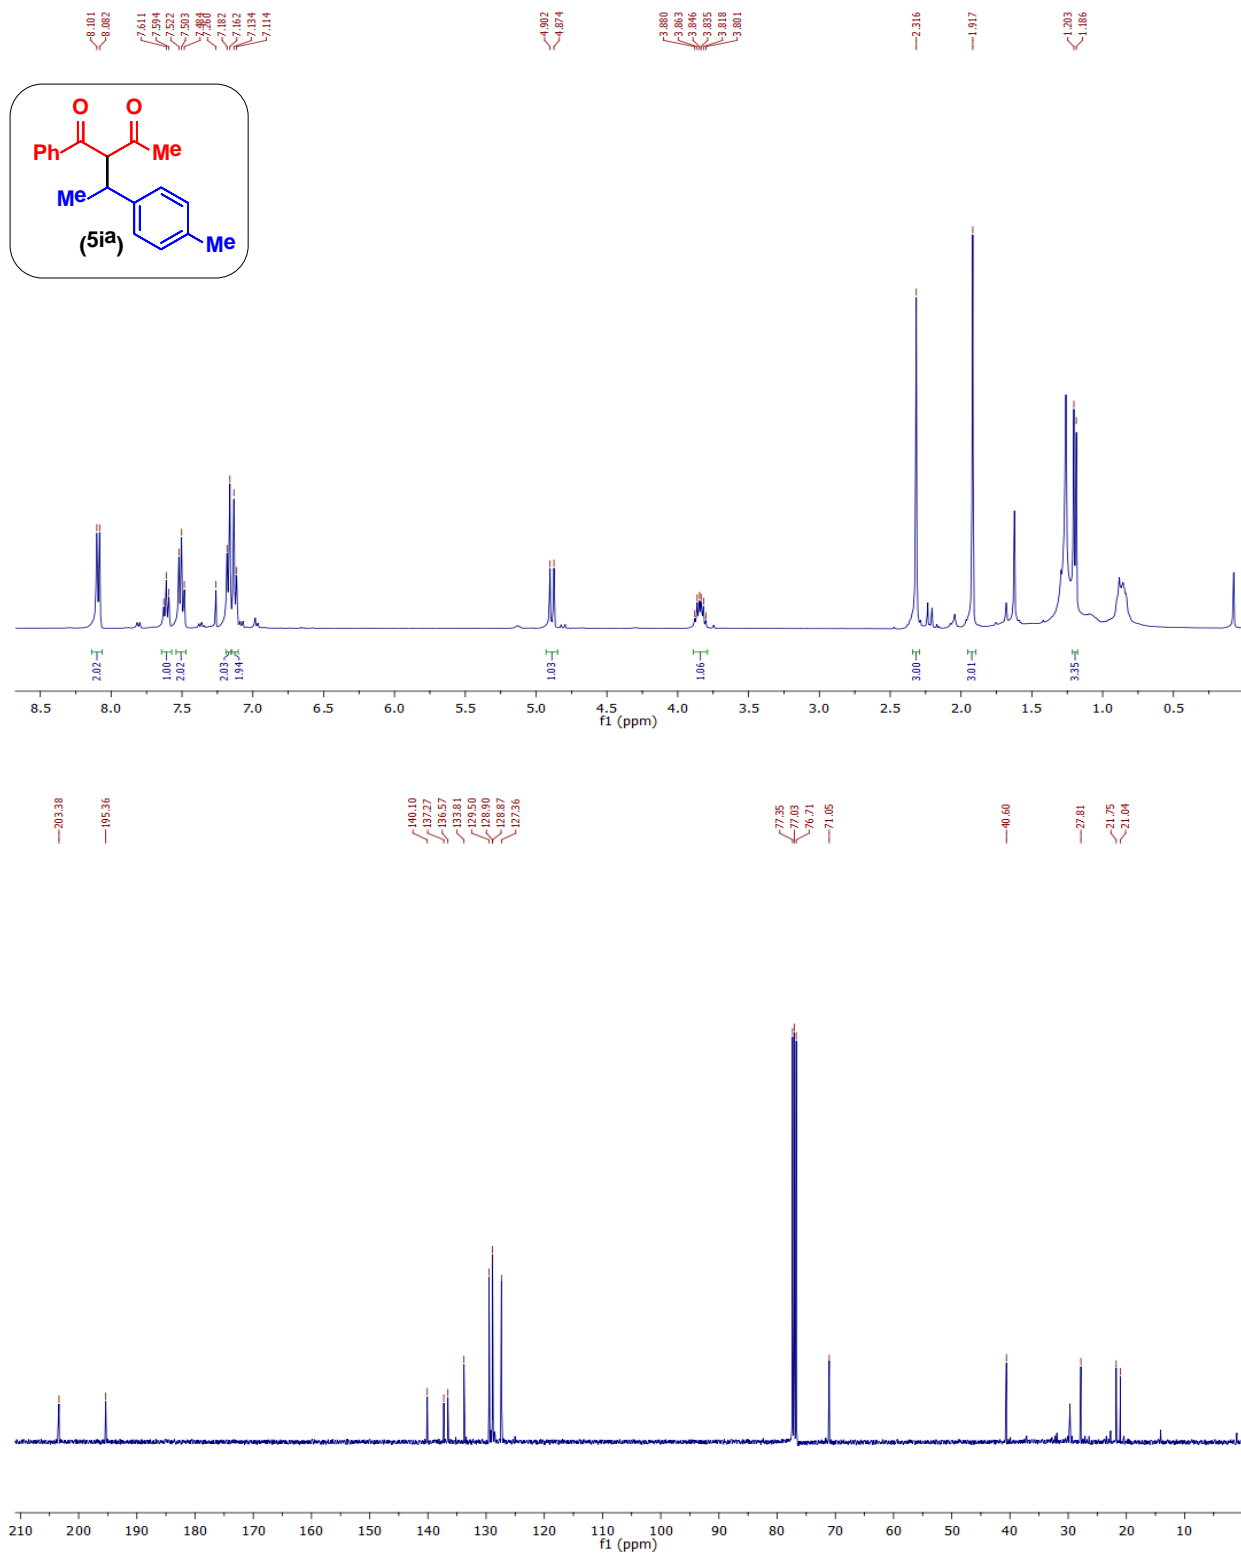

Figure S28 <sup>1</sup>H and <sup>13</sup>C NMR spectra of **5ia**

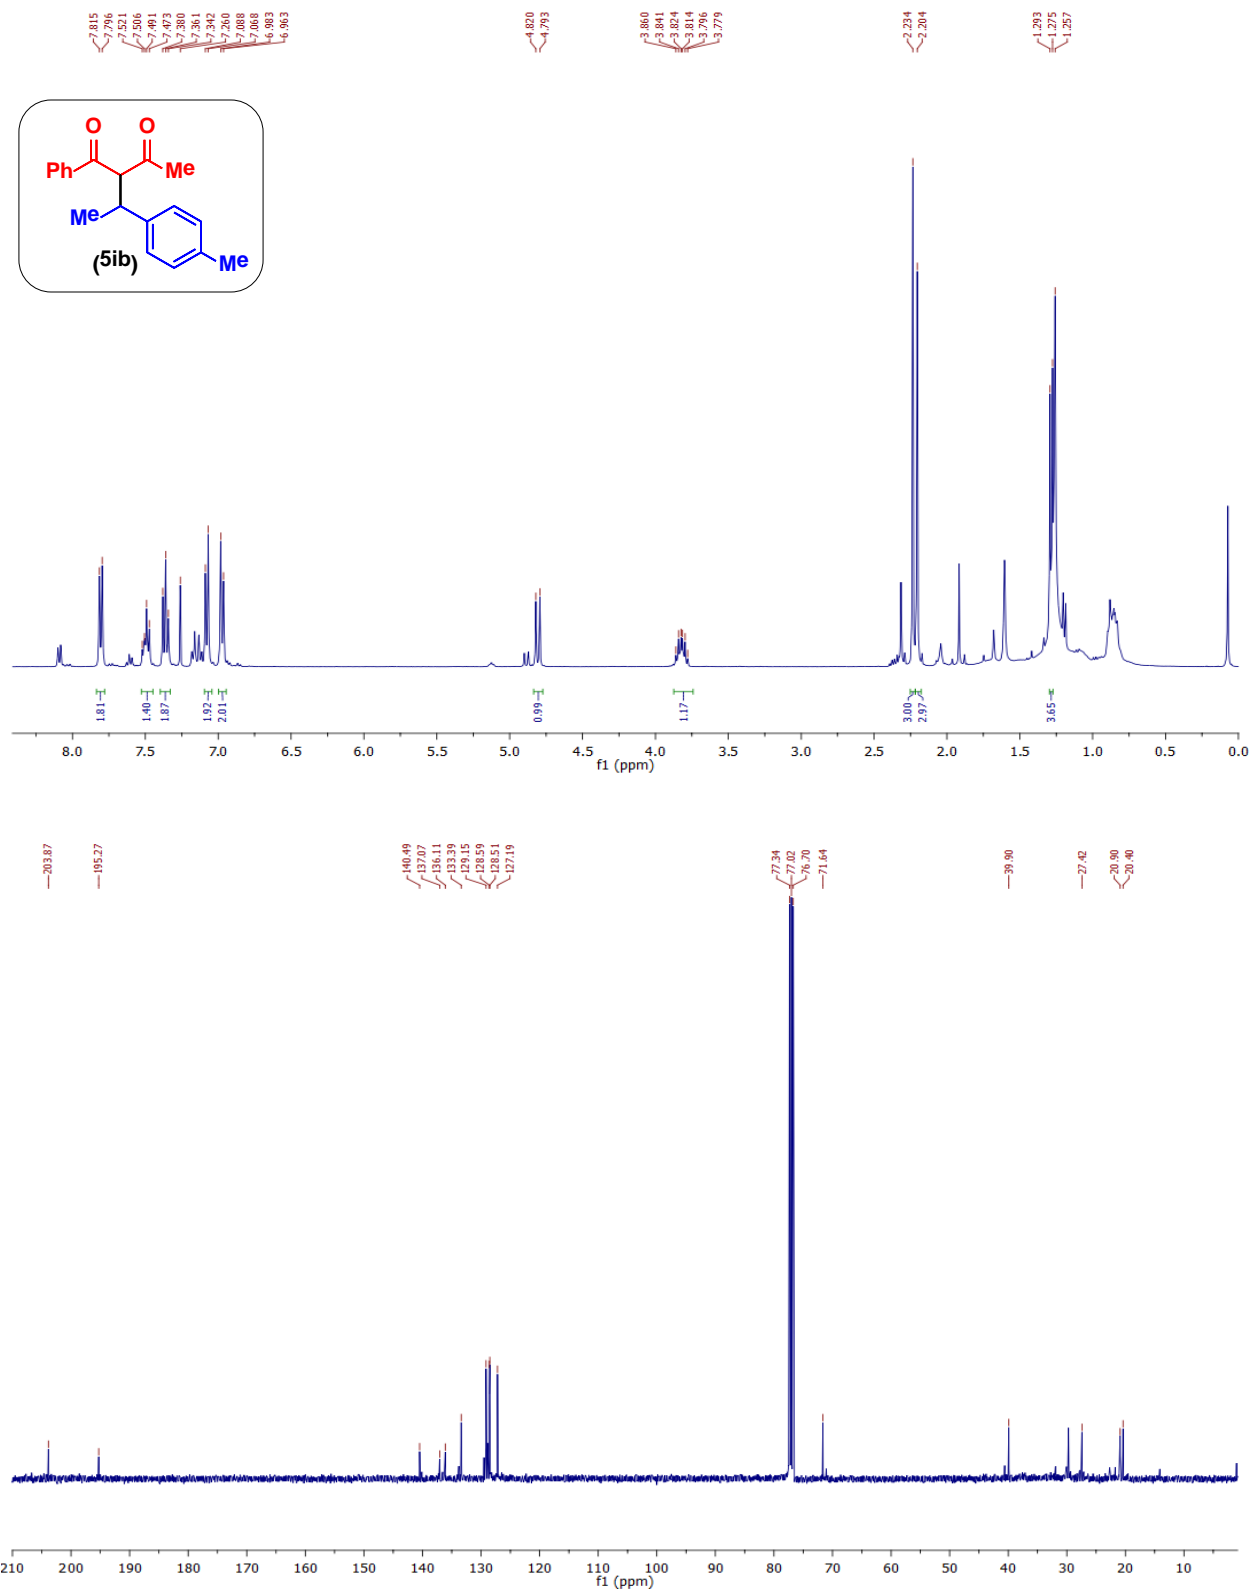

Figure S29 <sup>1</sup>H and <sup>13</sup>C NMR spectra of **5ib**

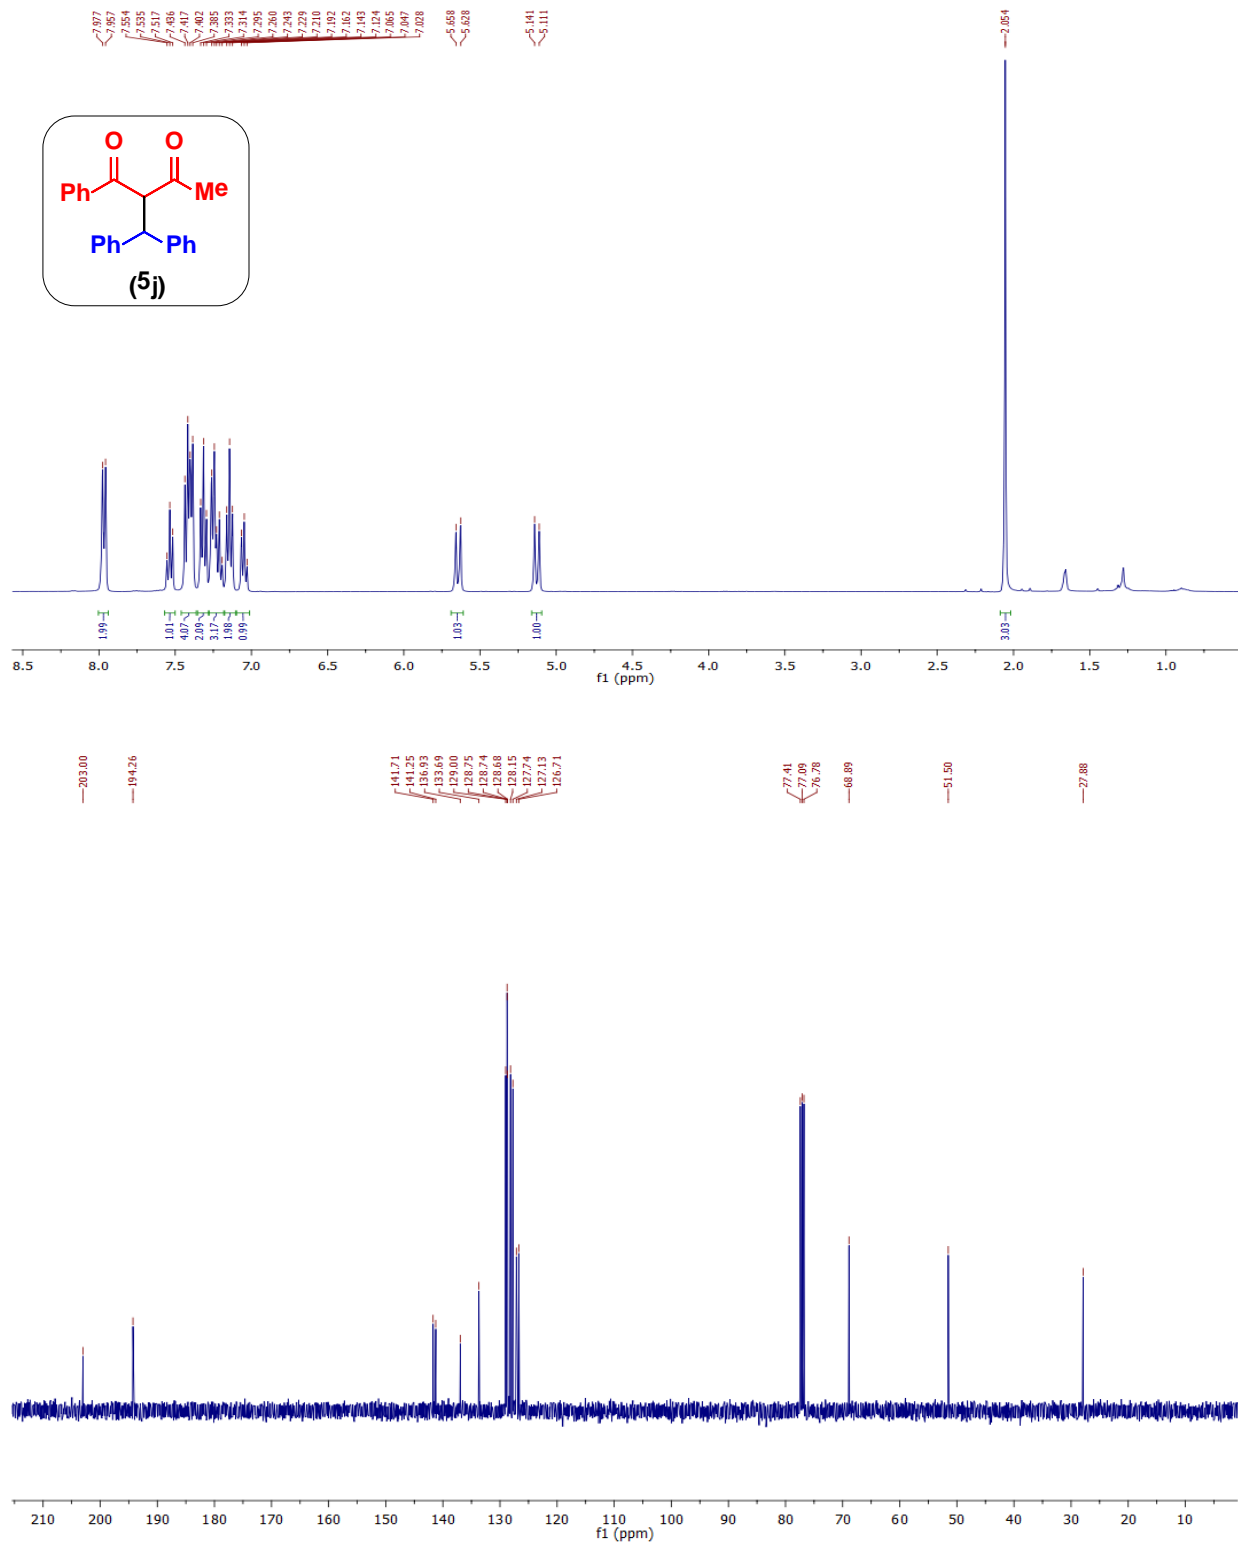

Figure S30 <sup>1</sup>H and <sup>13</sup>C NMR spectra of **5j**

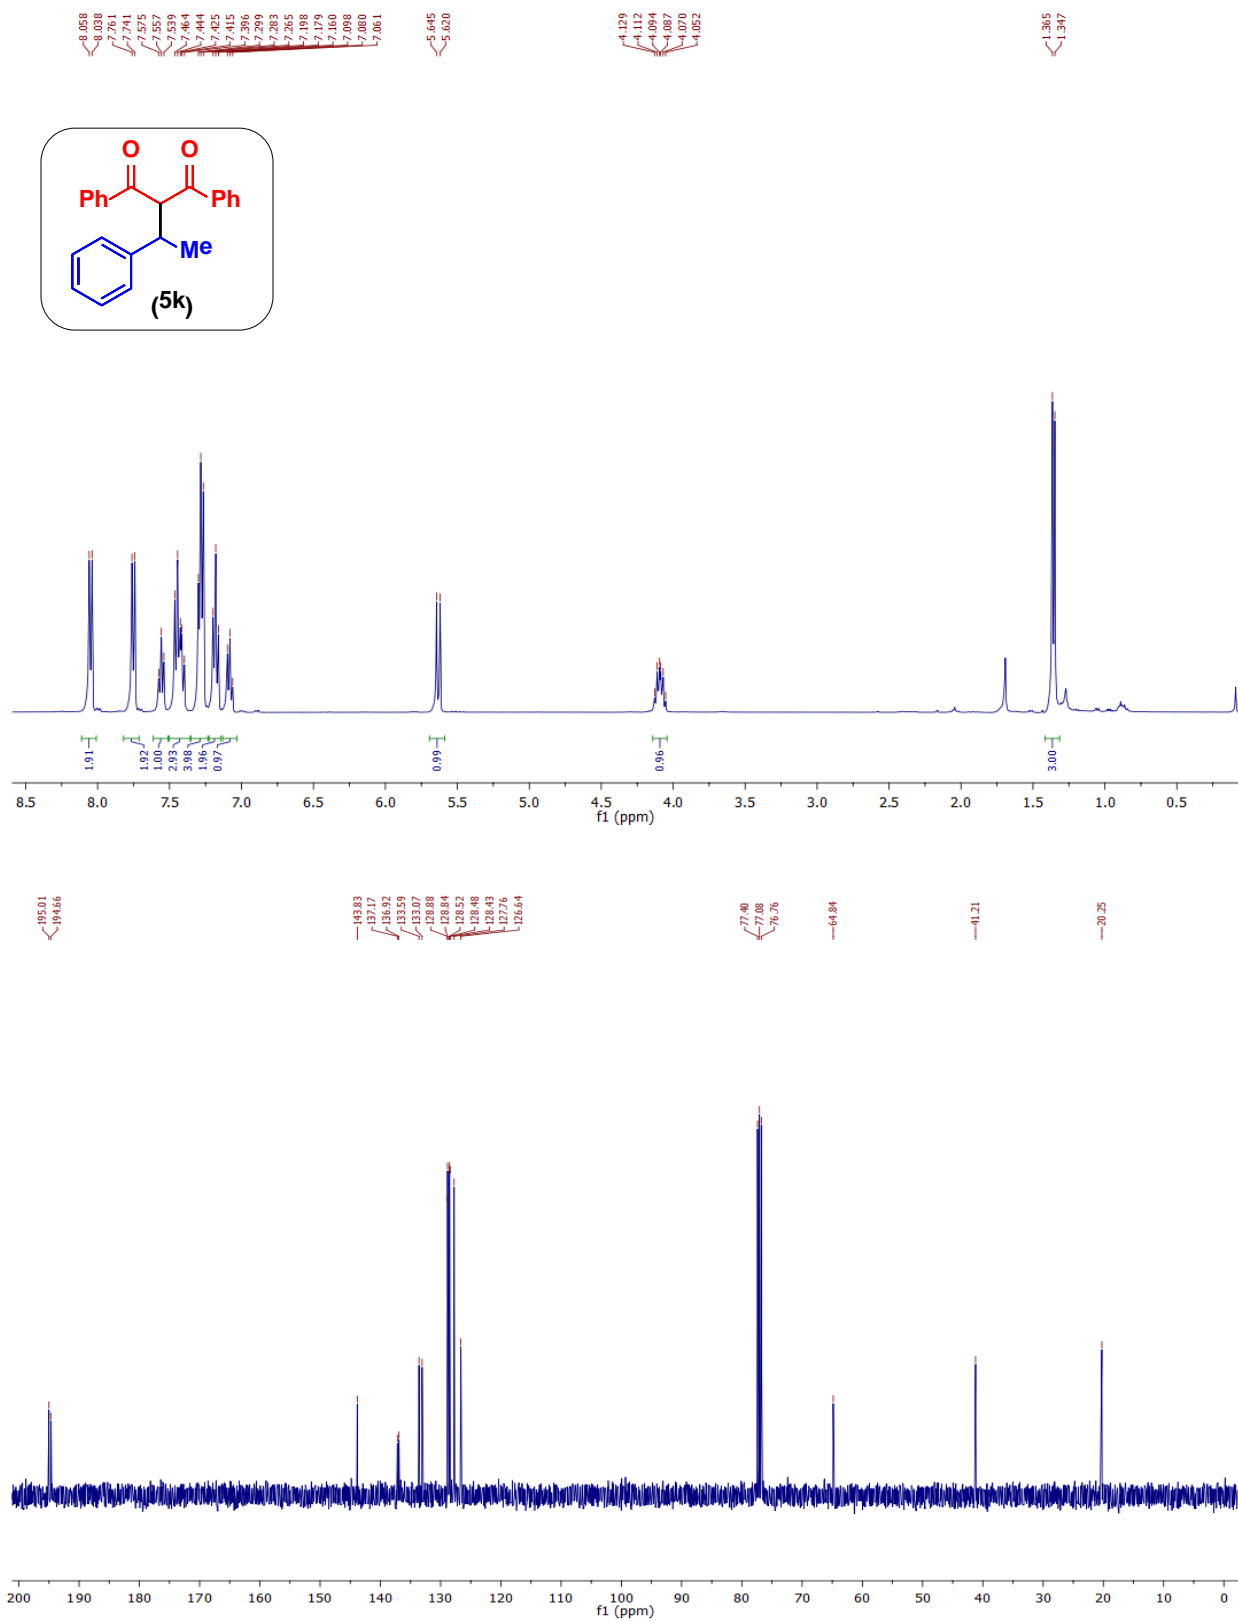

Figure S31 <sup>1</sup>H and <sup>13</sup>C NMR spectra of **5k**

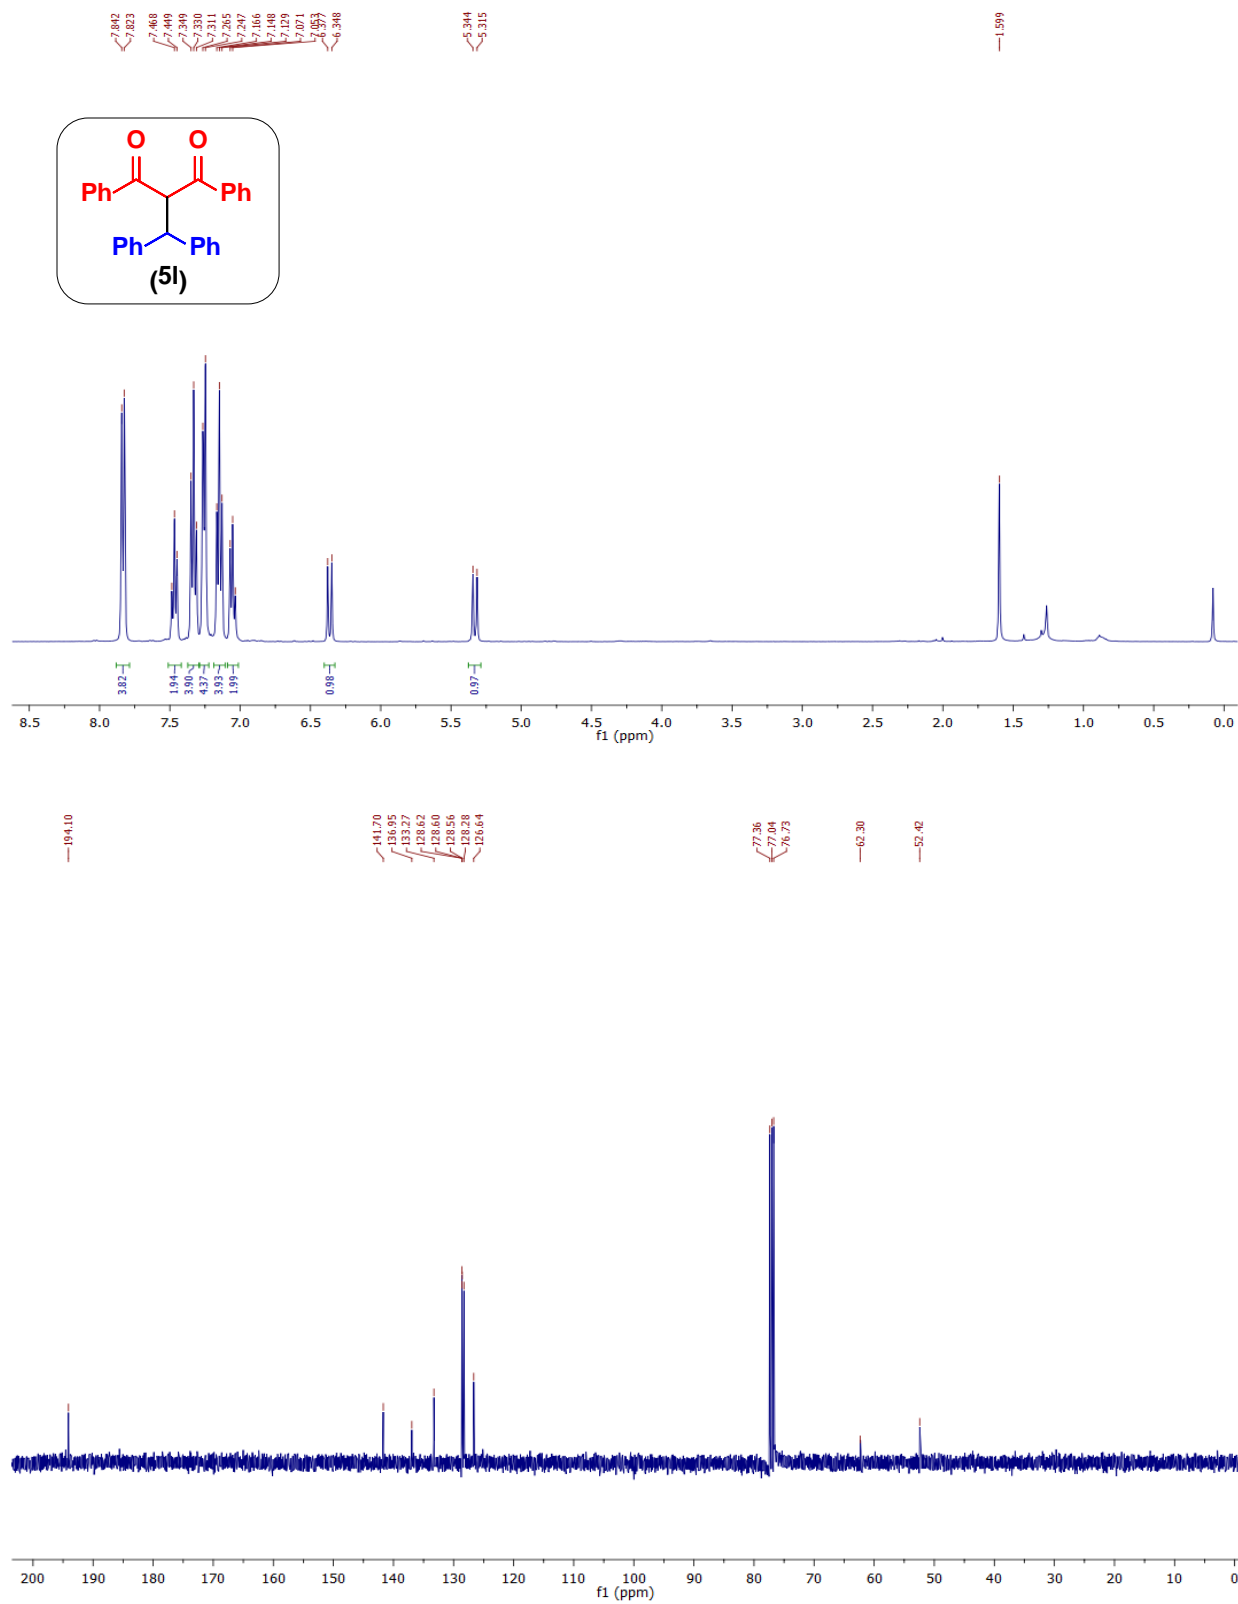

Figure S32 <sup>1</sup>H and <sup>13</sup>C NMR spectra of **51**



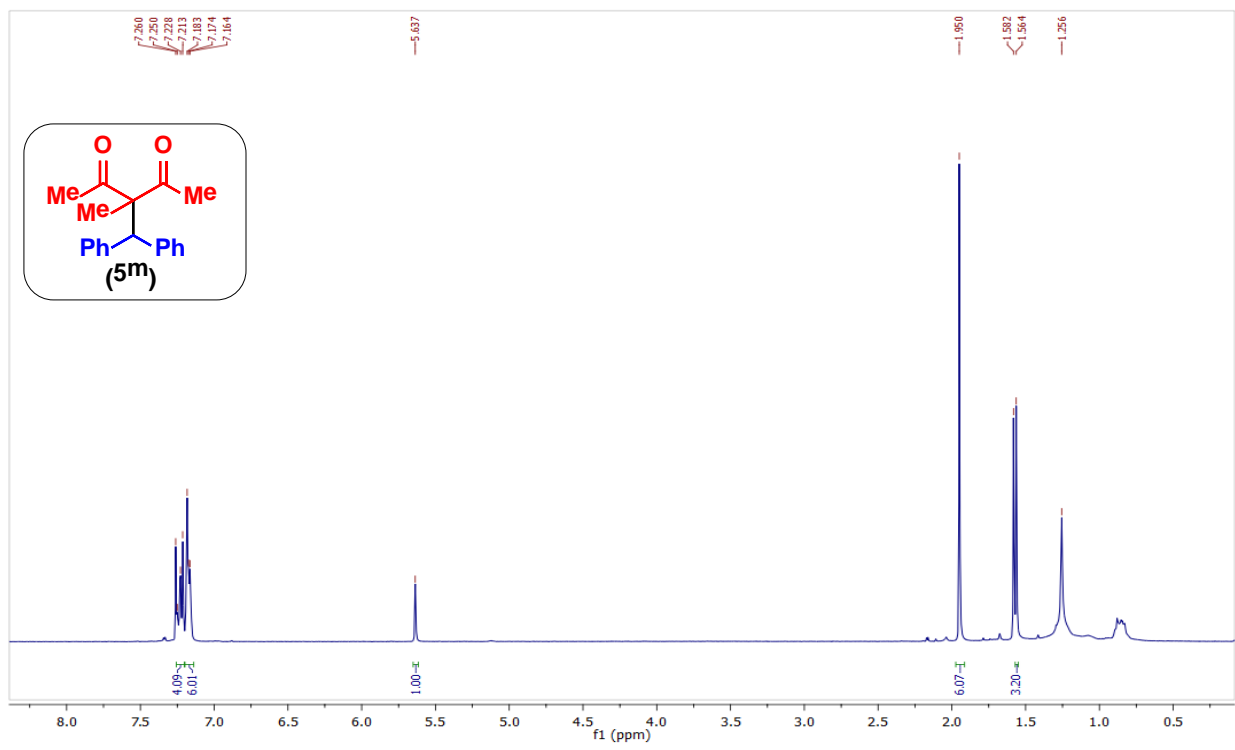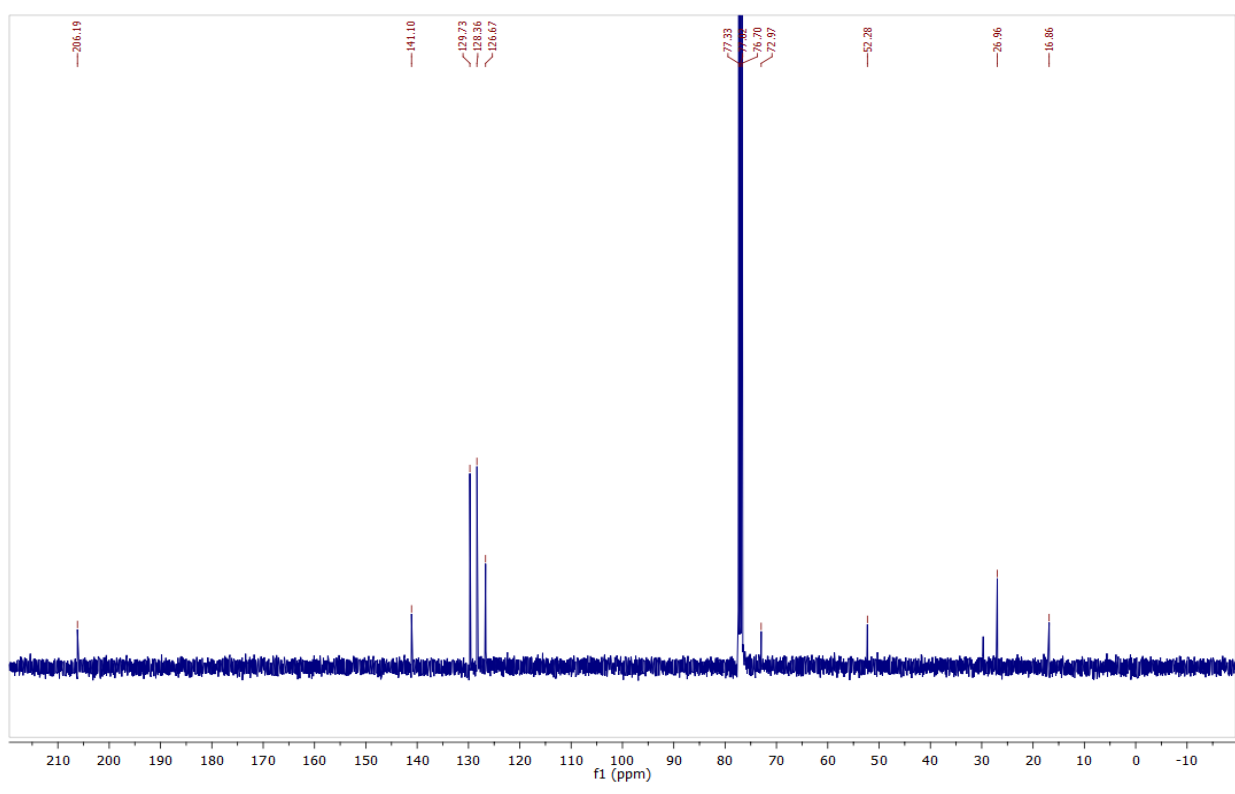

Figure S33 <sup>1</sup>H and <sup>13</sup>C NMR spectra of **5m**

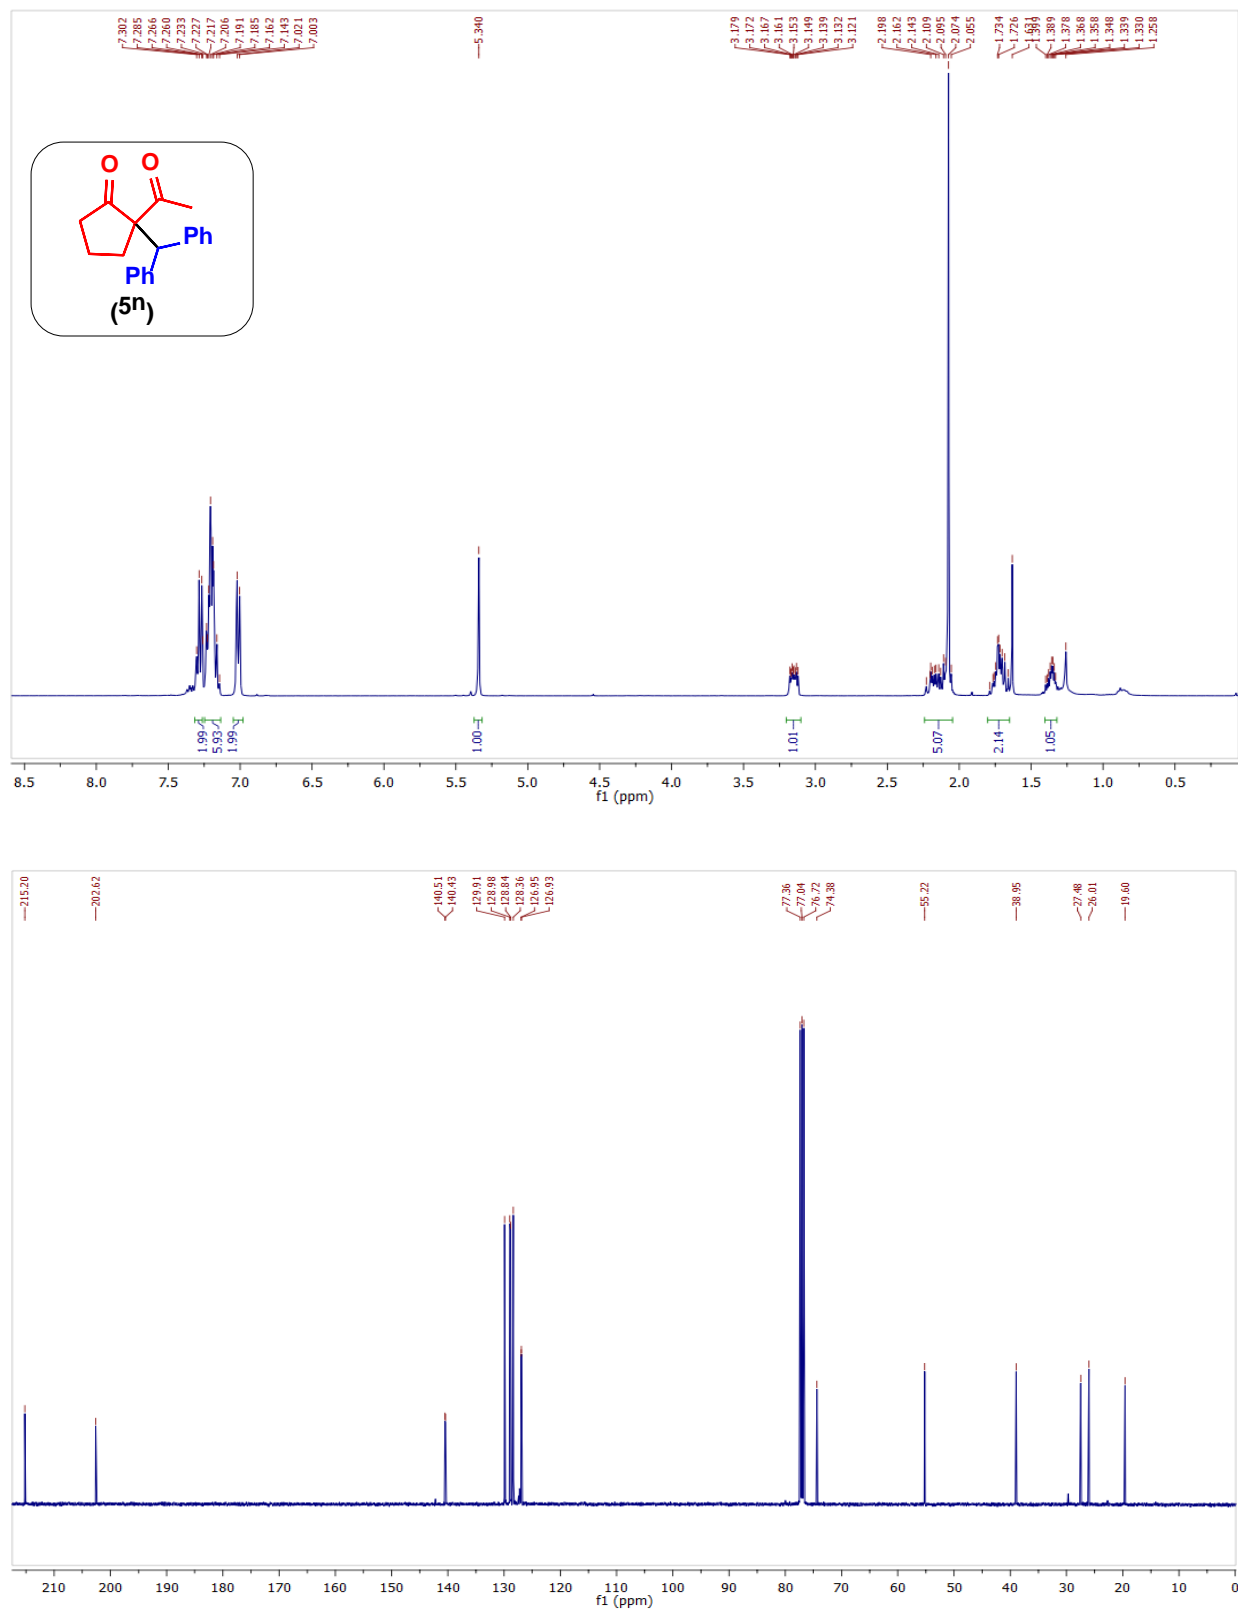

Figure S34 <sup>1</sup>H and <sup>13</sup>C NMR spectra of **5n**

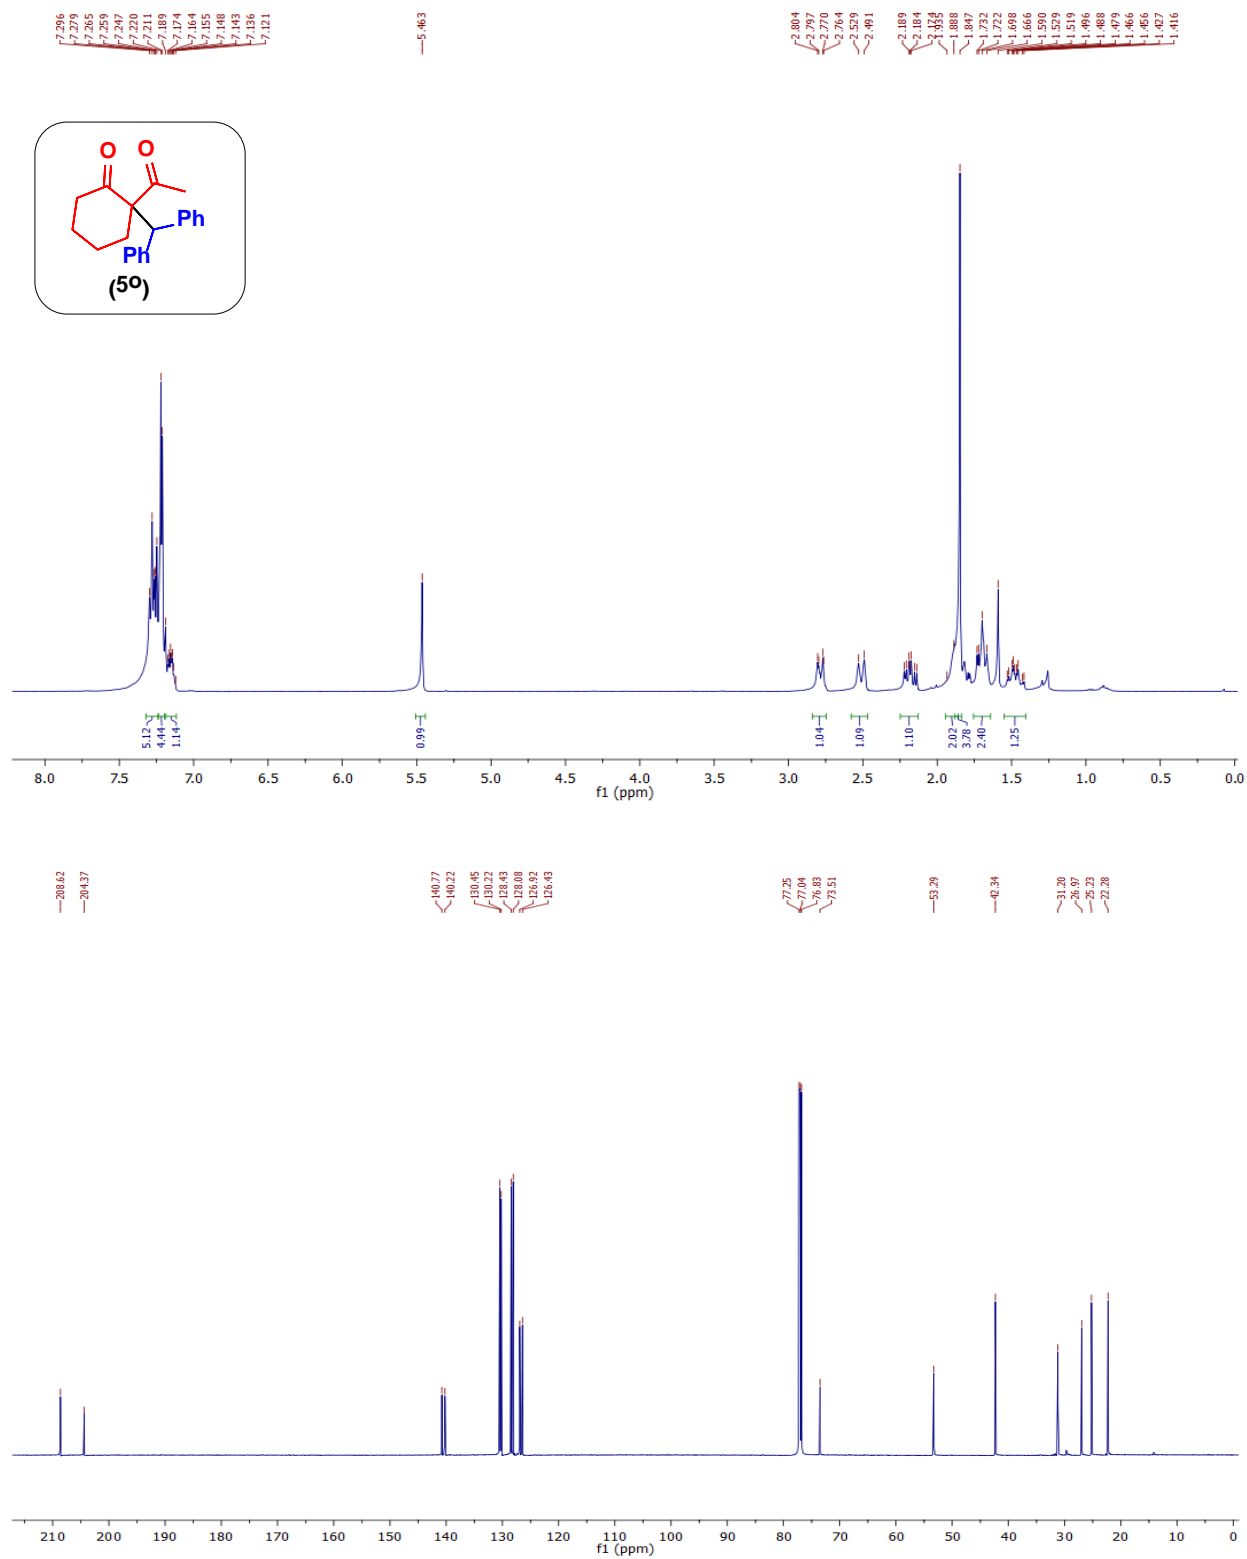

Figure S35 <sup>1</sup>H and <sup>13</sup>C NMR spectra of **5o**

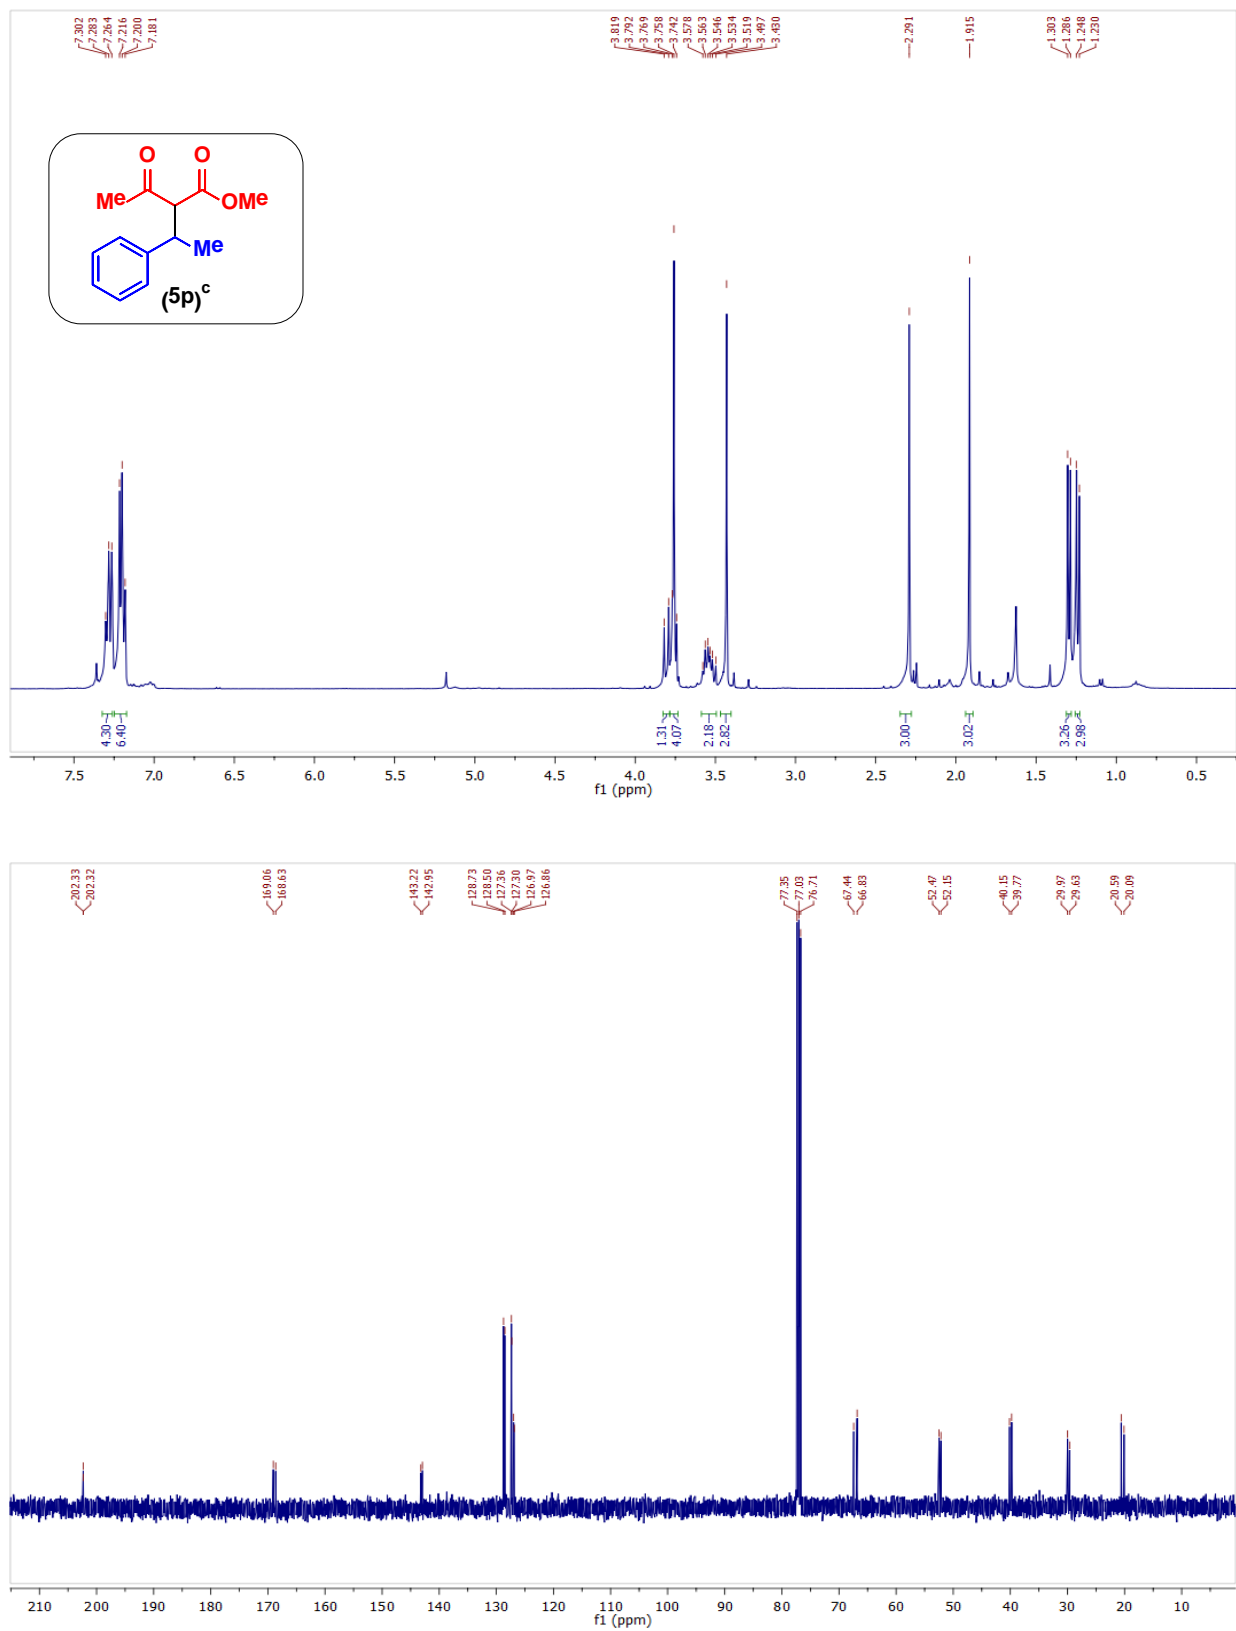

Figure S36 <sup>1</sup>H and <sup>13</sup>C NMR spectra of **5p** (1:1 diastereomers)

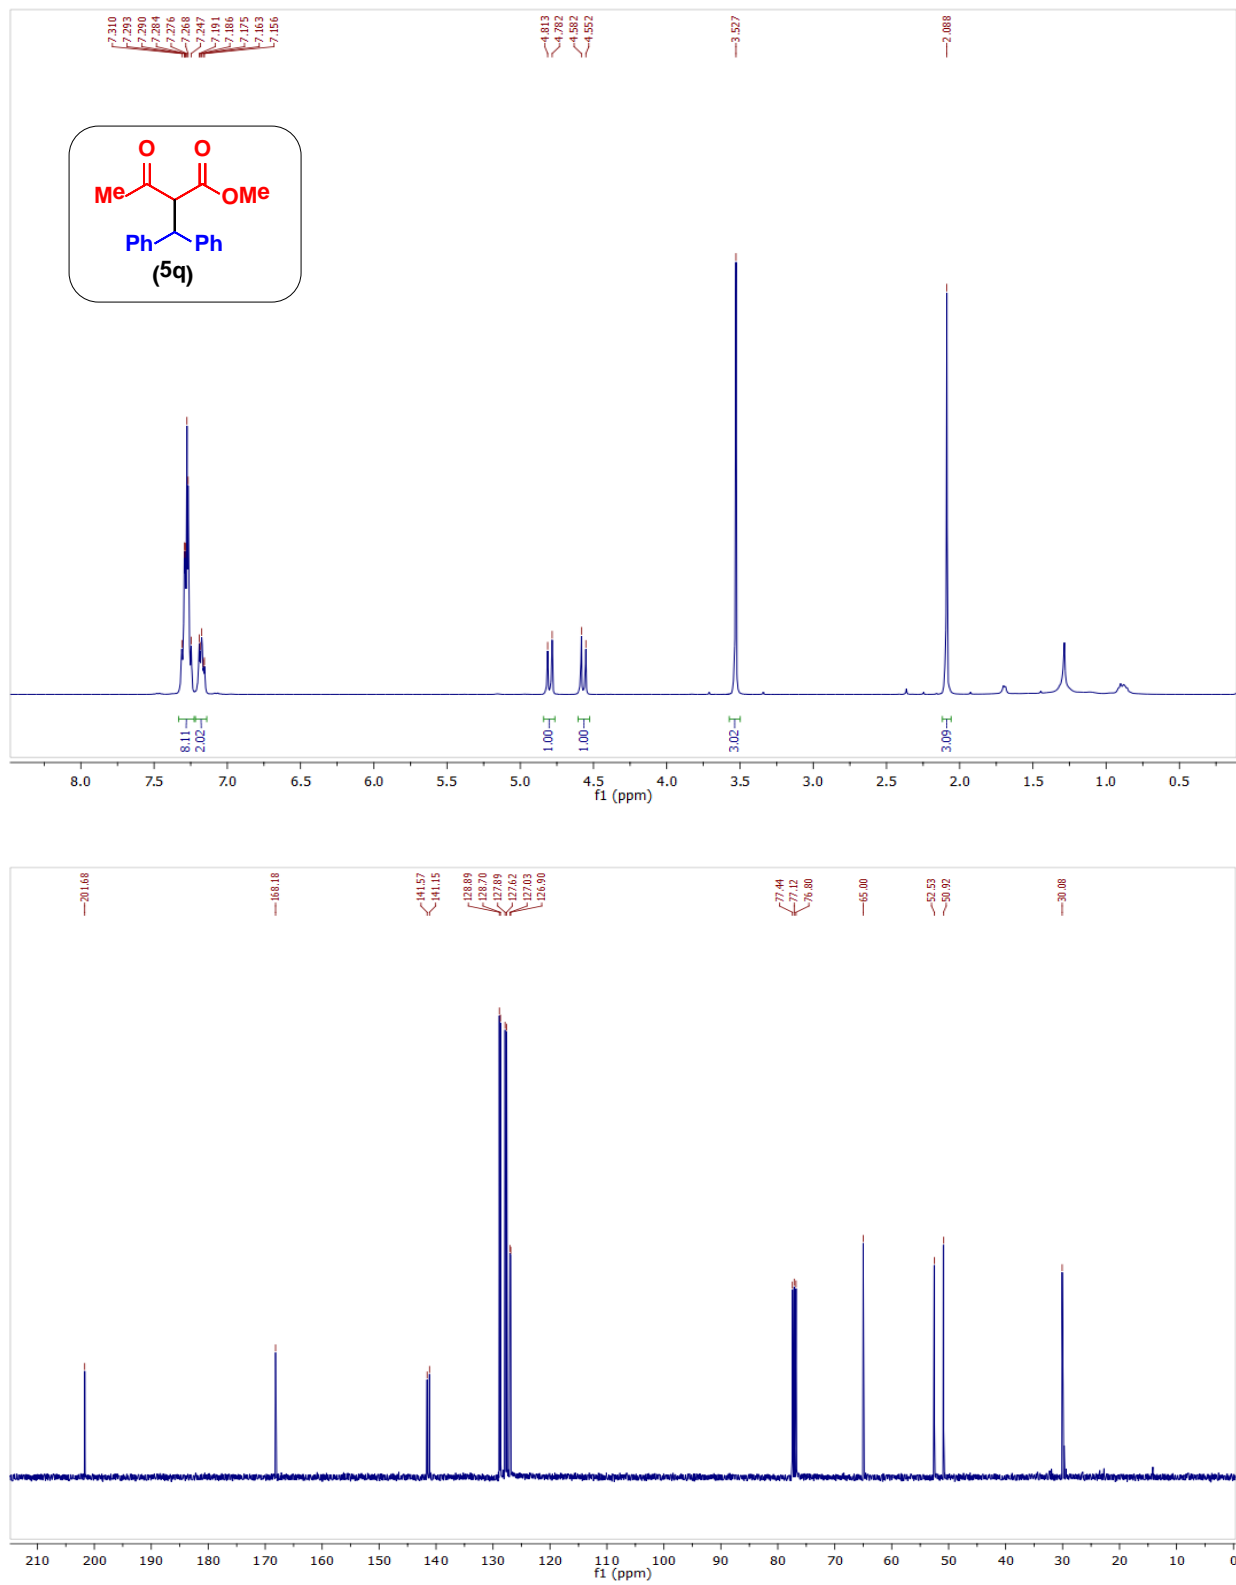

Figure S37 <sup>1</sup>H and <sup>13</sup>C NMR spectra of **5q**

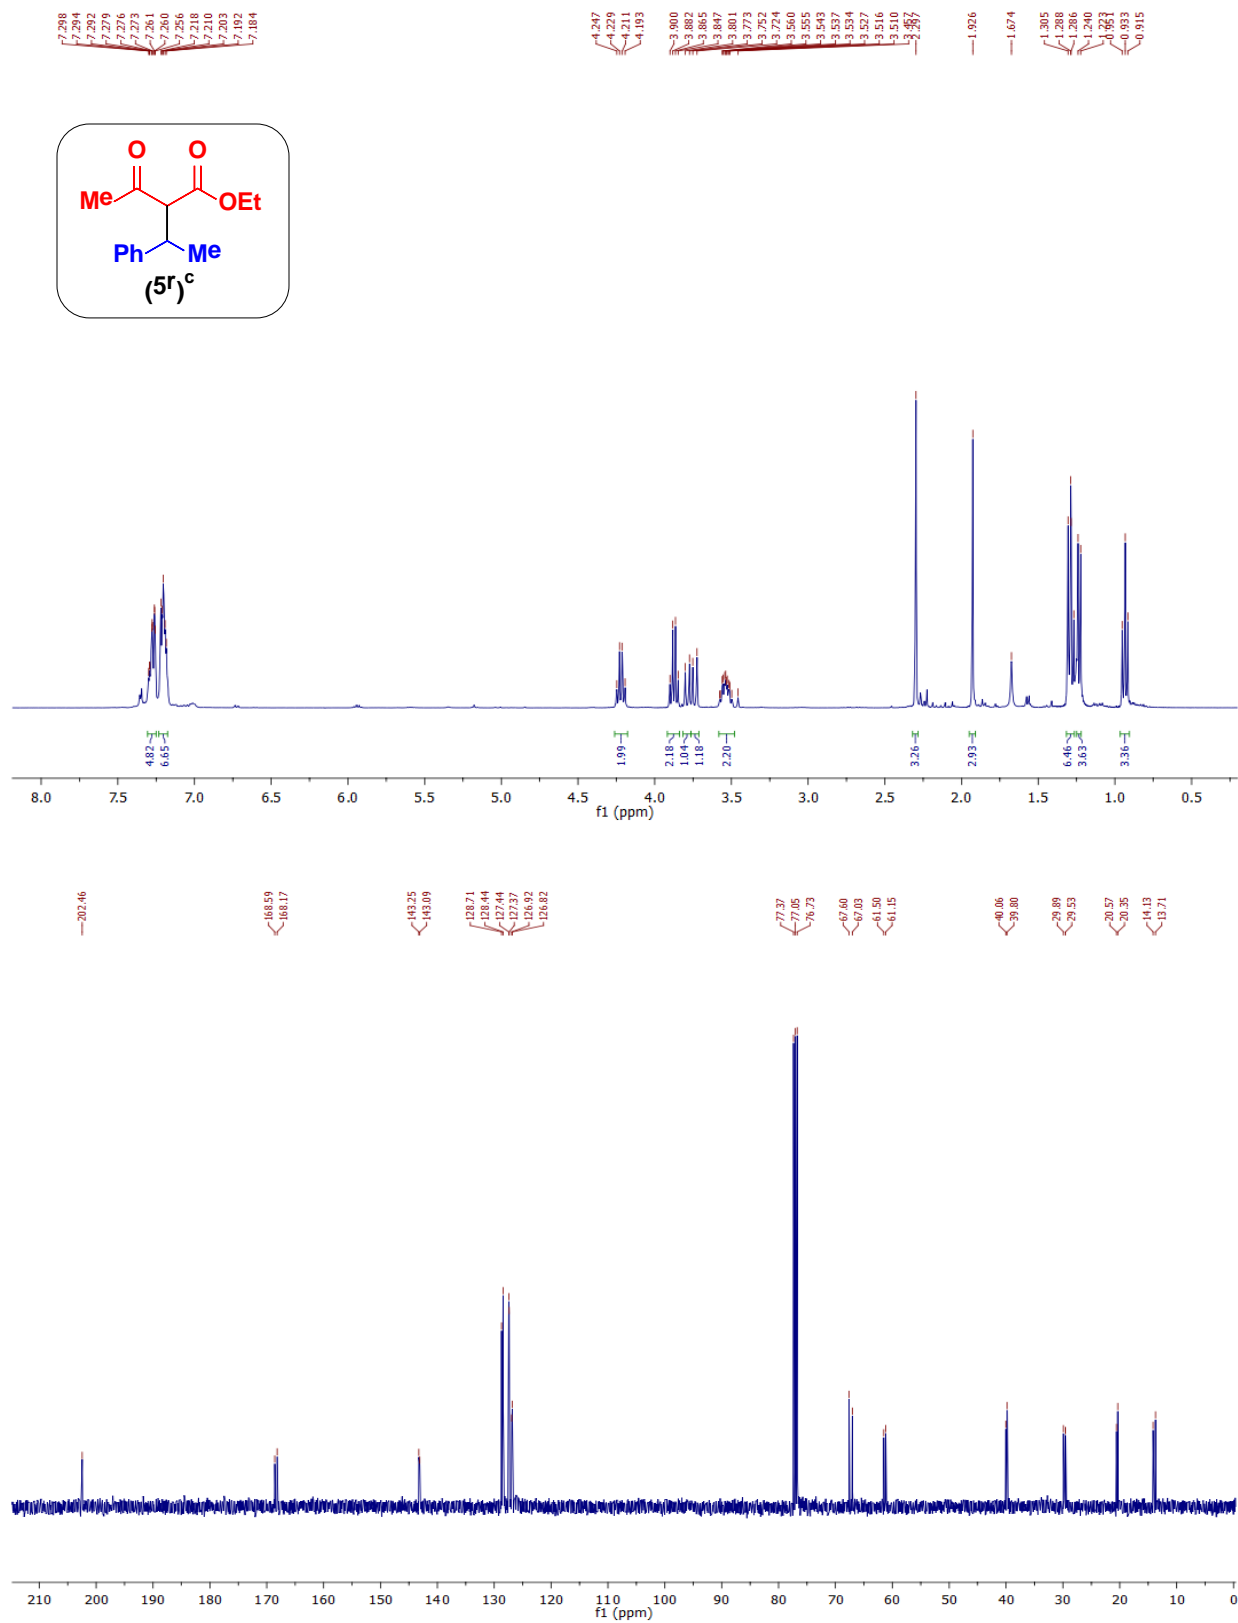

Figure S38 <sup>1</sup>H and <sup>13</sup>C NMR spectra of **5r** (1:1 distereomer)

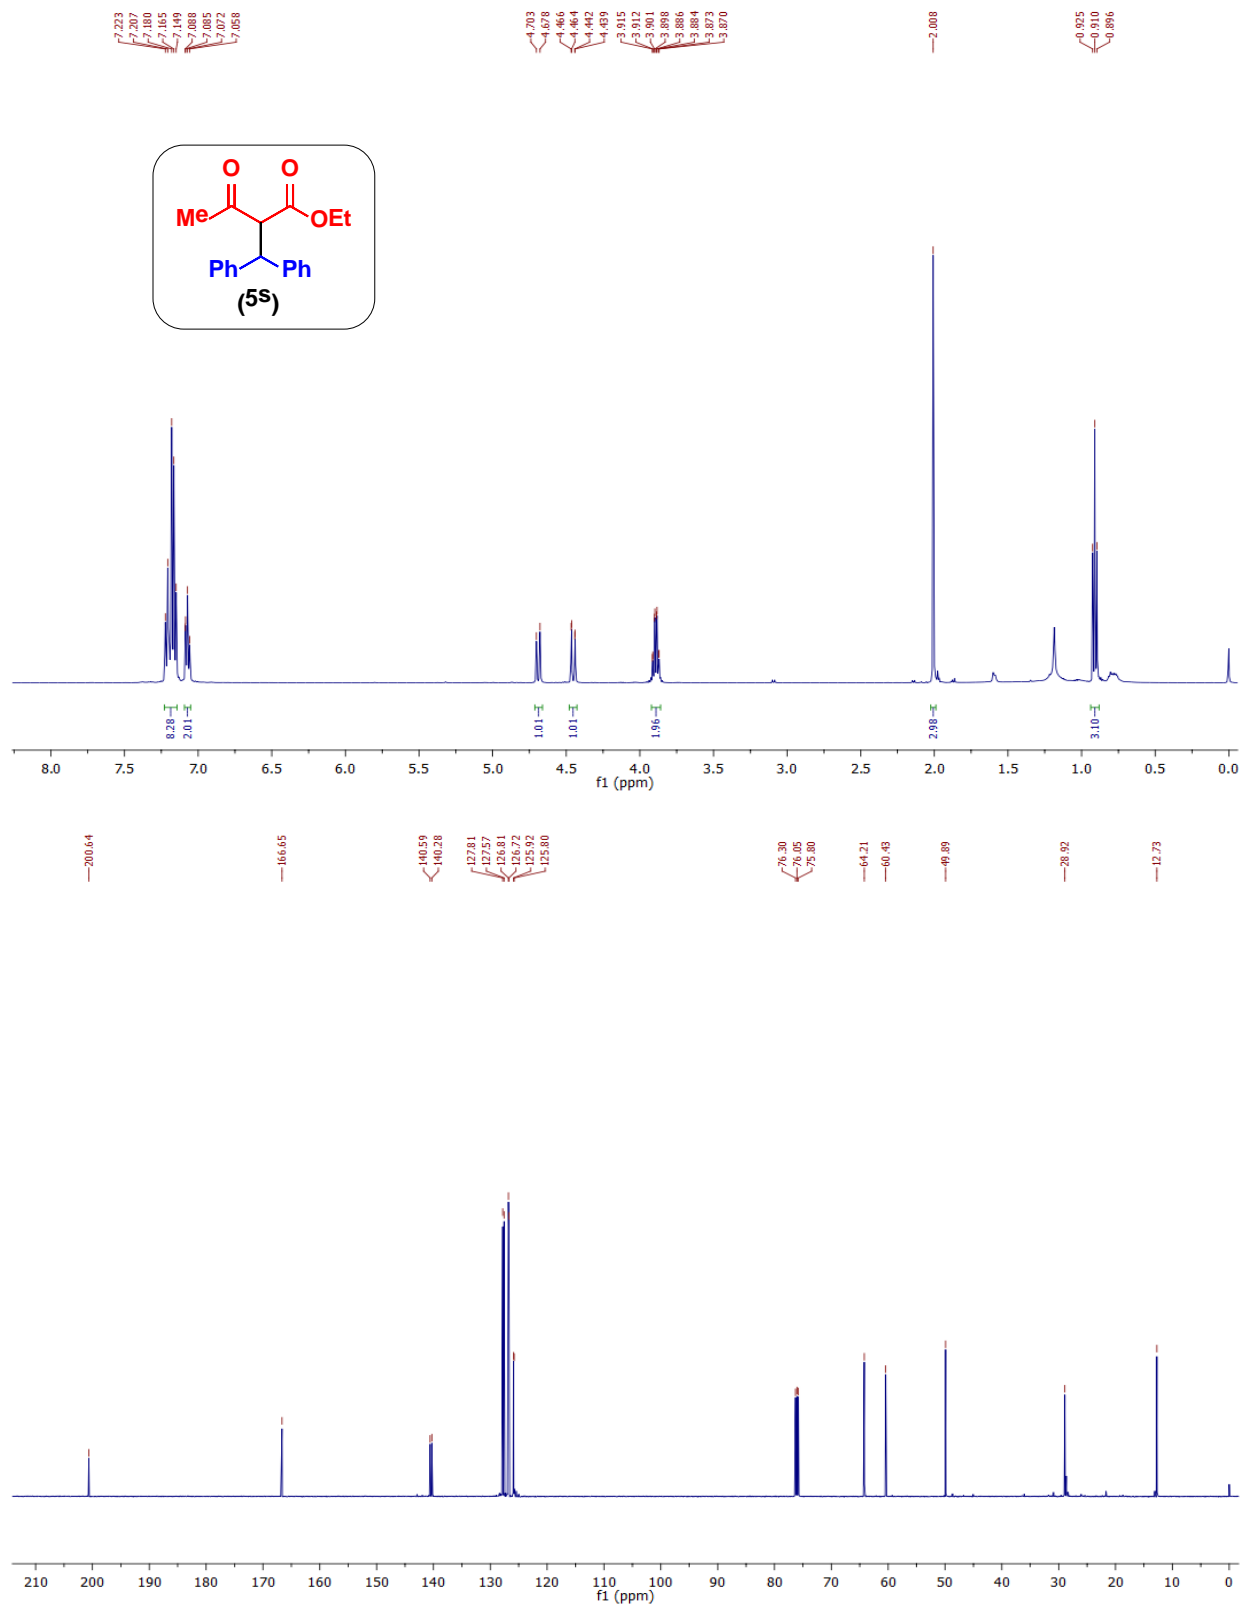

Figure S39 <sup>1</sup>H and <sup>13</sup>C NMR spectra of **5s**

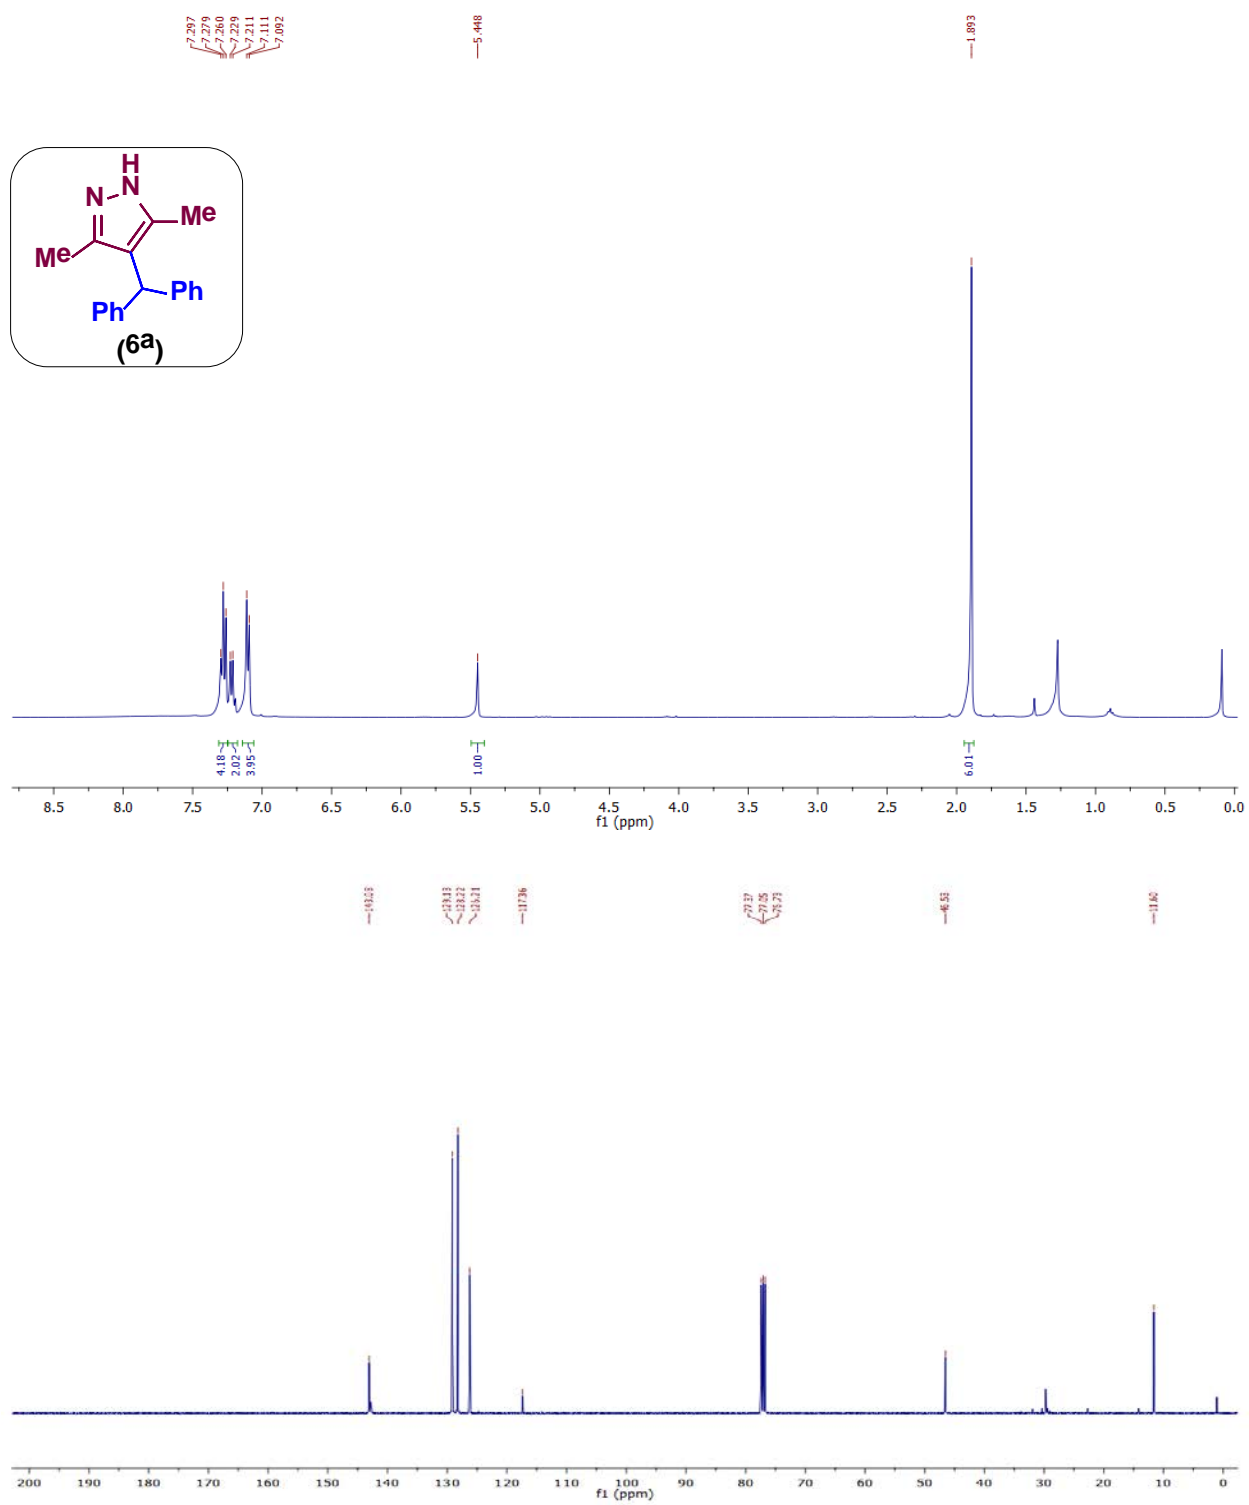

Figure S40  $^1\text{H}$  and  $^{13}\text{C}$  NMR spectra of **6a**



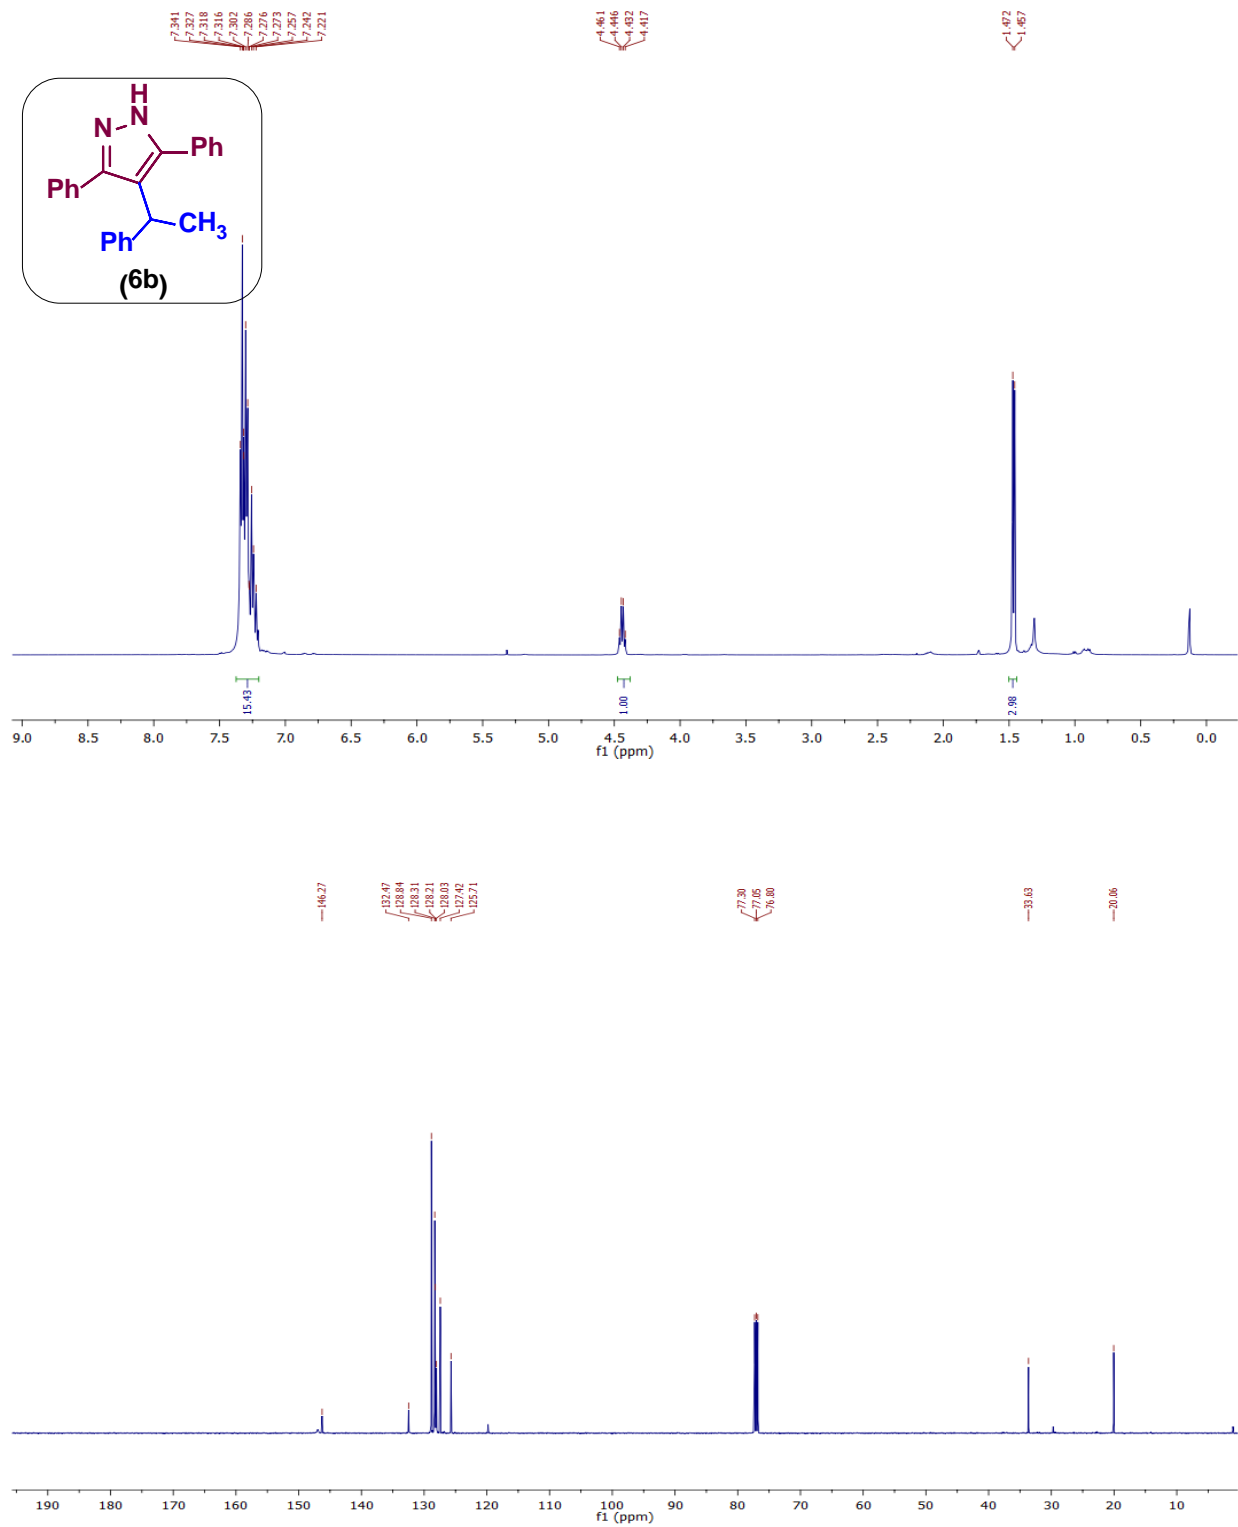

Figure S41 <sup>1</sup>H and <sup>13</sup>C NMR spectra of **6b**

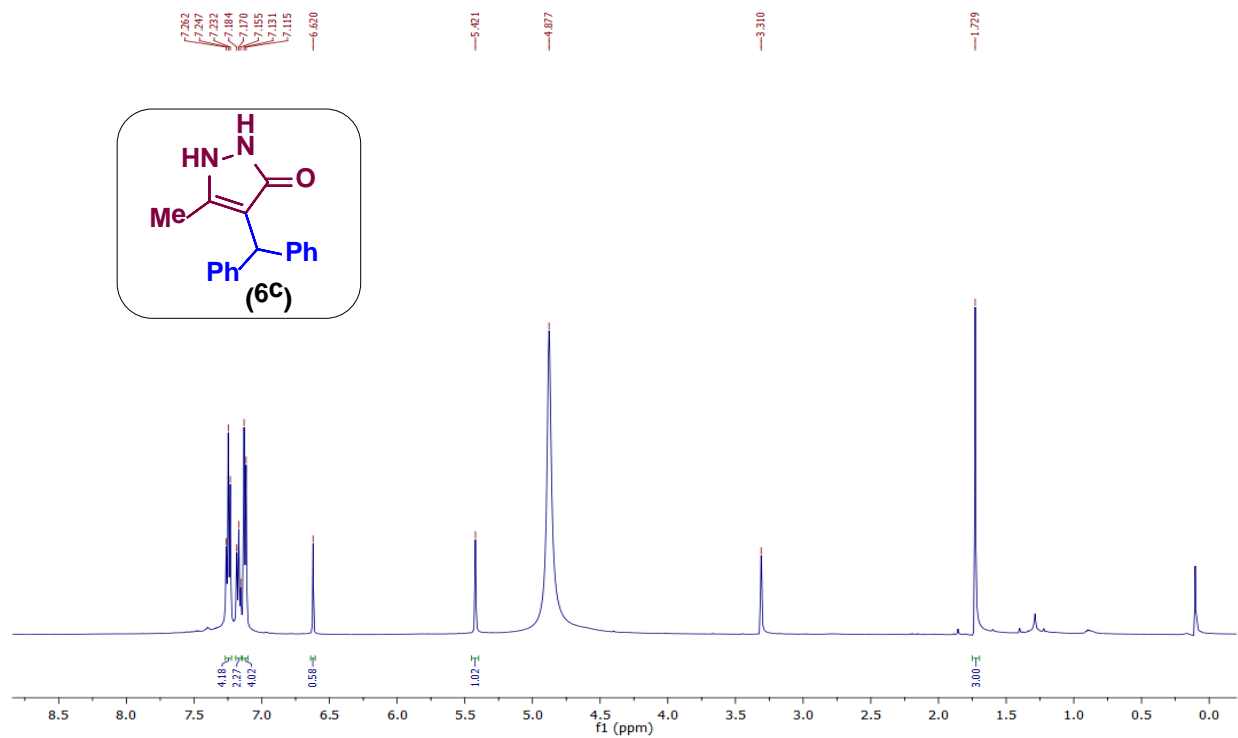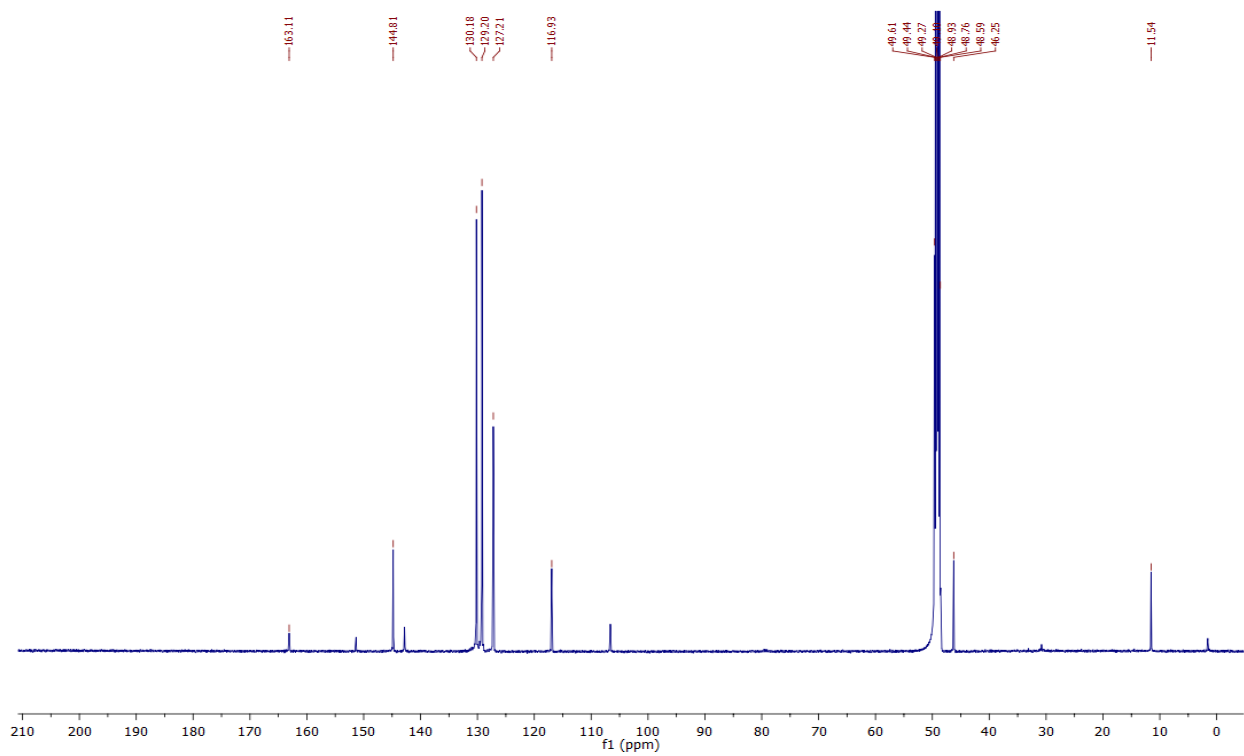

Figure S42  $^1\text{H}$  and  $^{13}\text{C}$  NMR spectra of **6c**

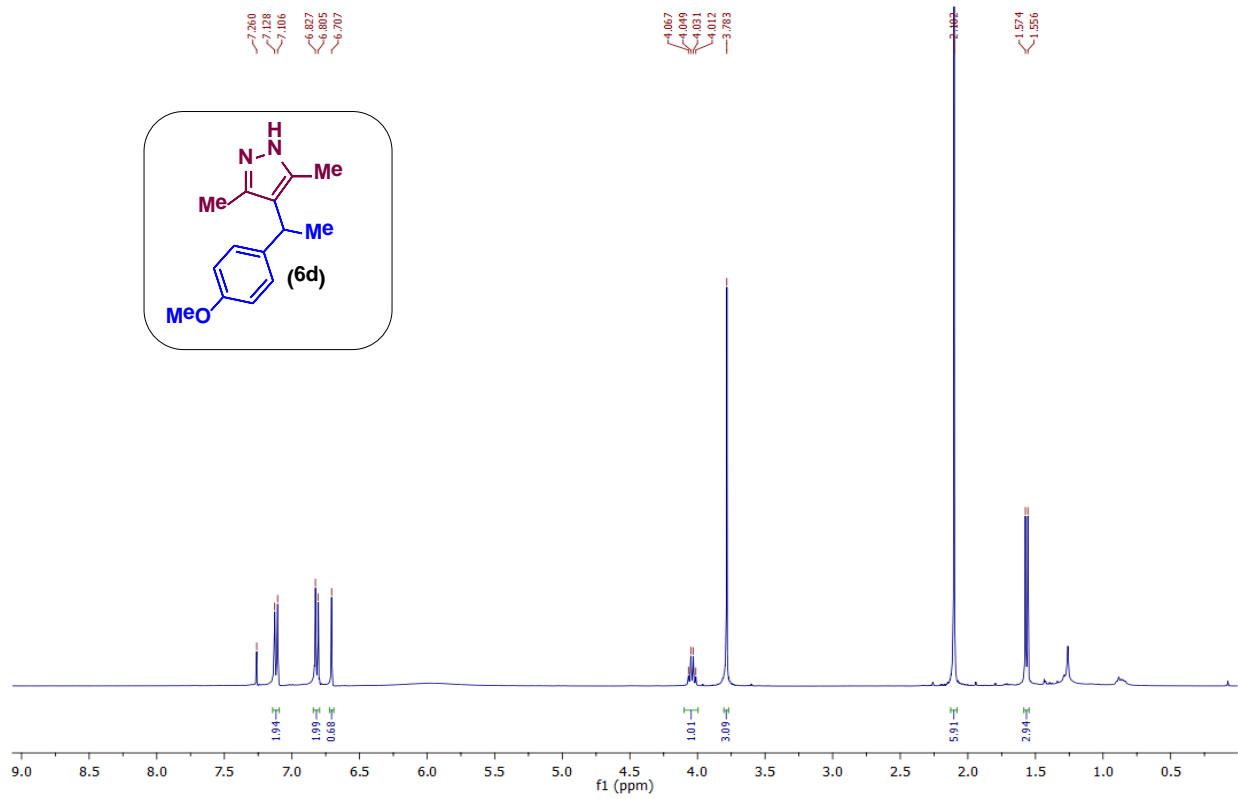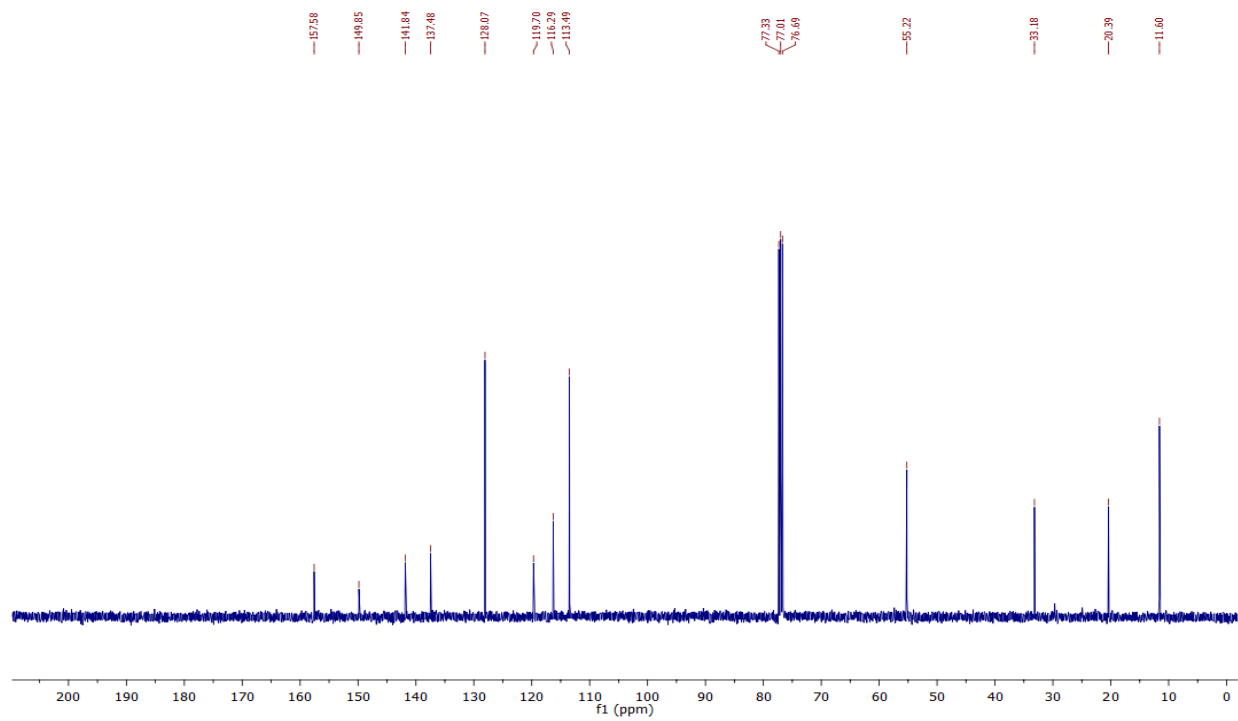

Figure S43 <sup>1</sup>H and <sup>13</sup>C NMR spectra of **6d**

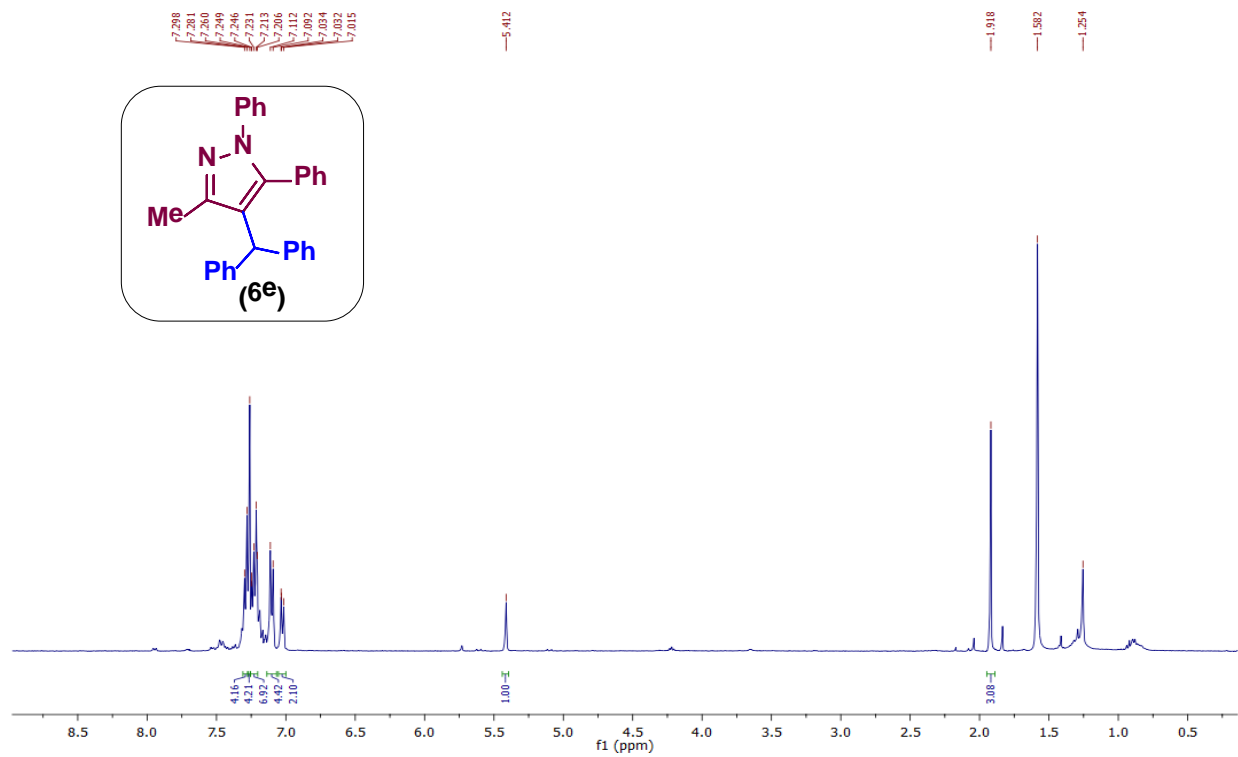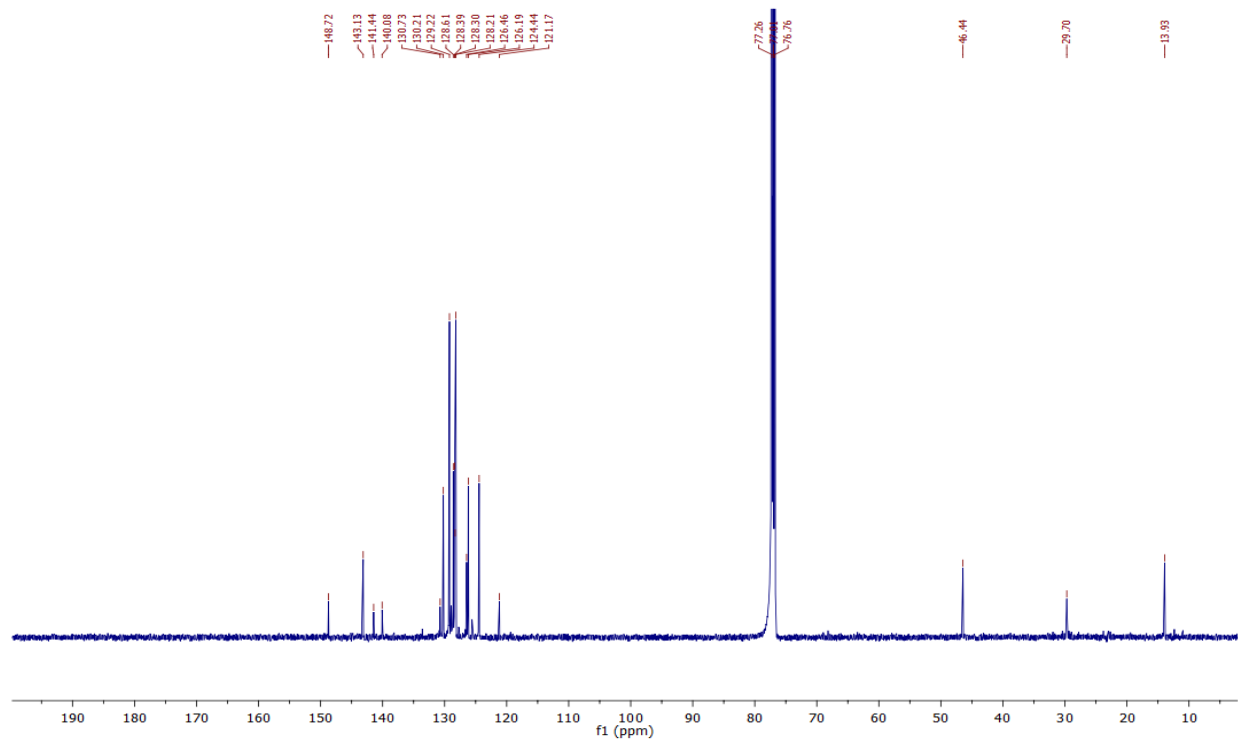

Figure S44 <sup>1</sup>H and <sup>13</sup>C NMR spectra of **6e**

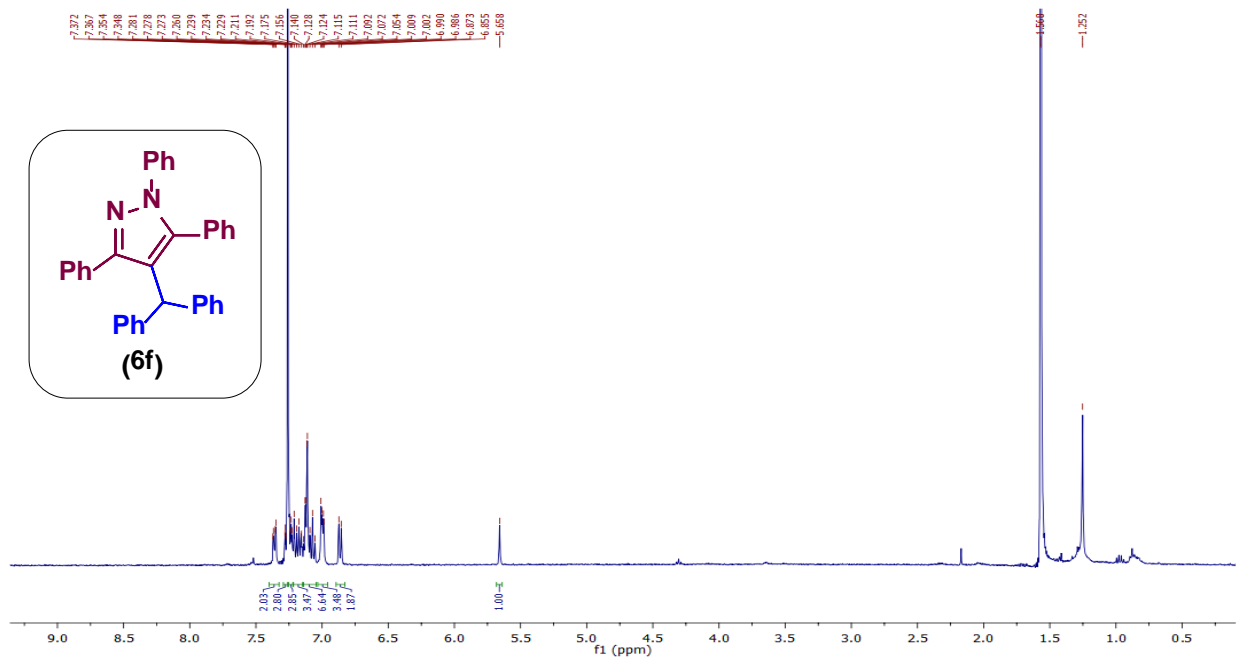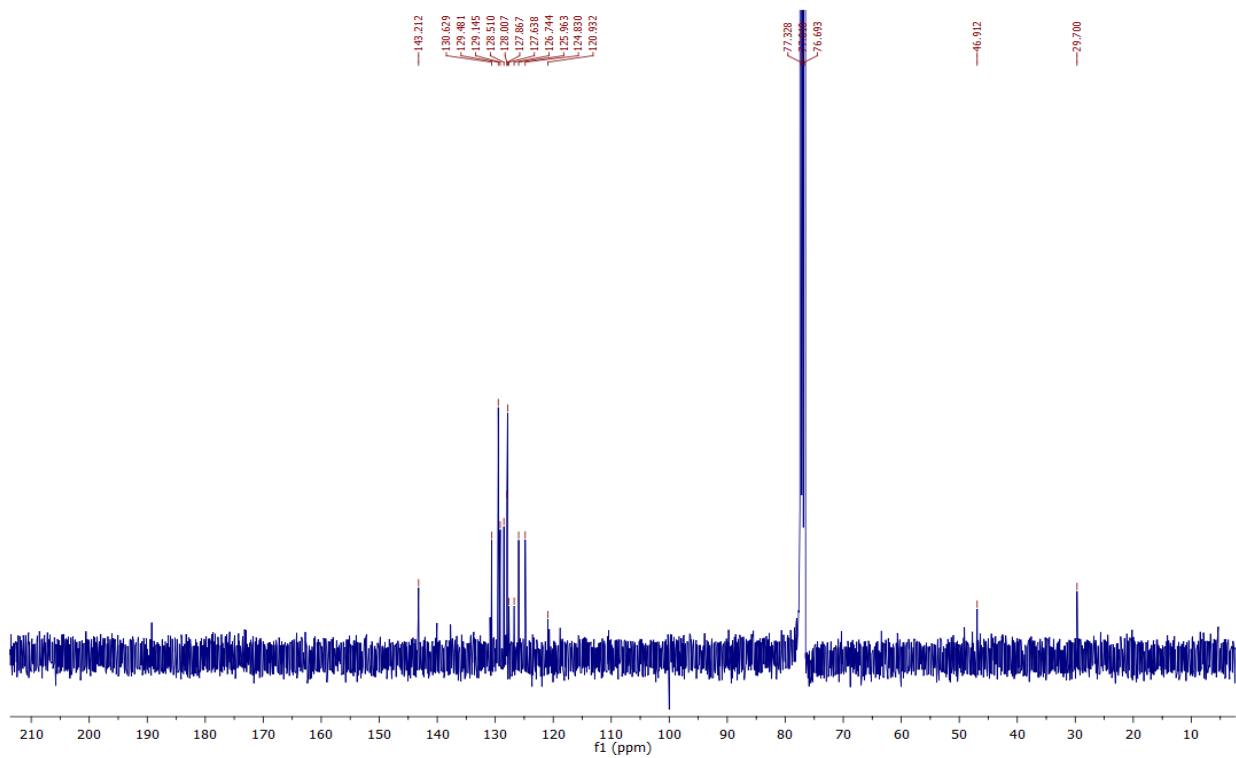

Figure S45 <sup>1</sup>H and <sup>13</sup>C NMR spectra of **6f**

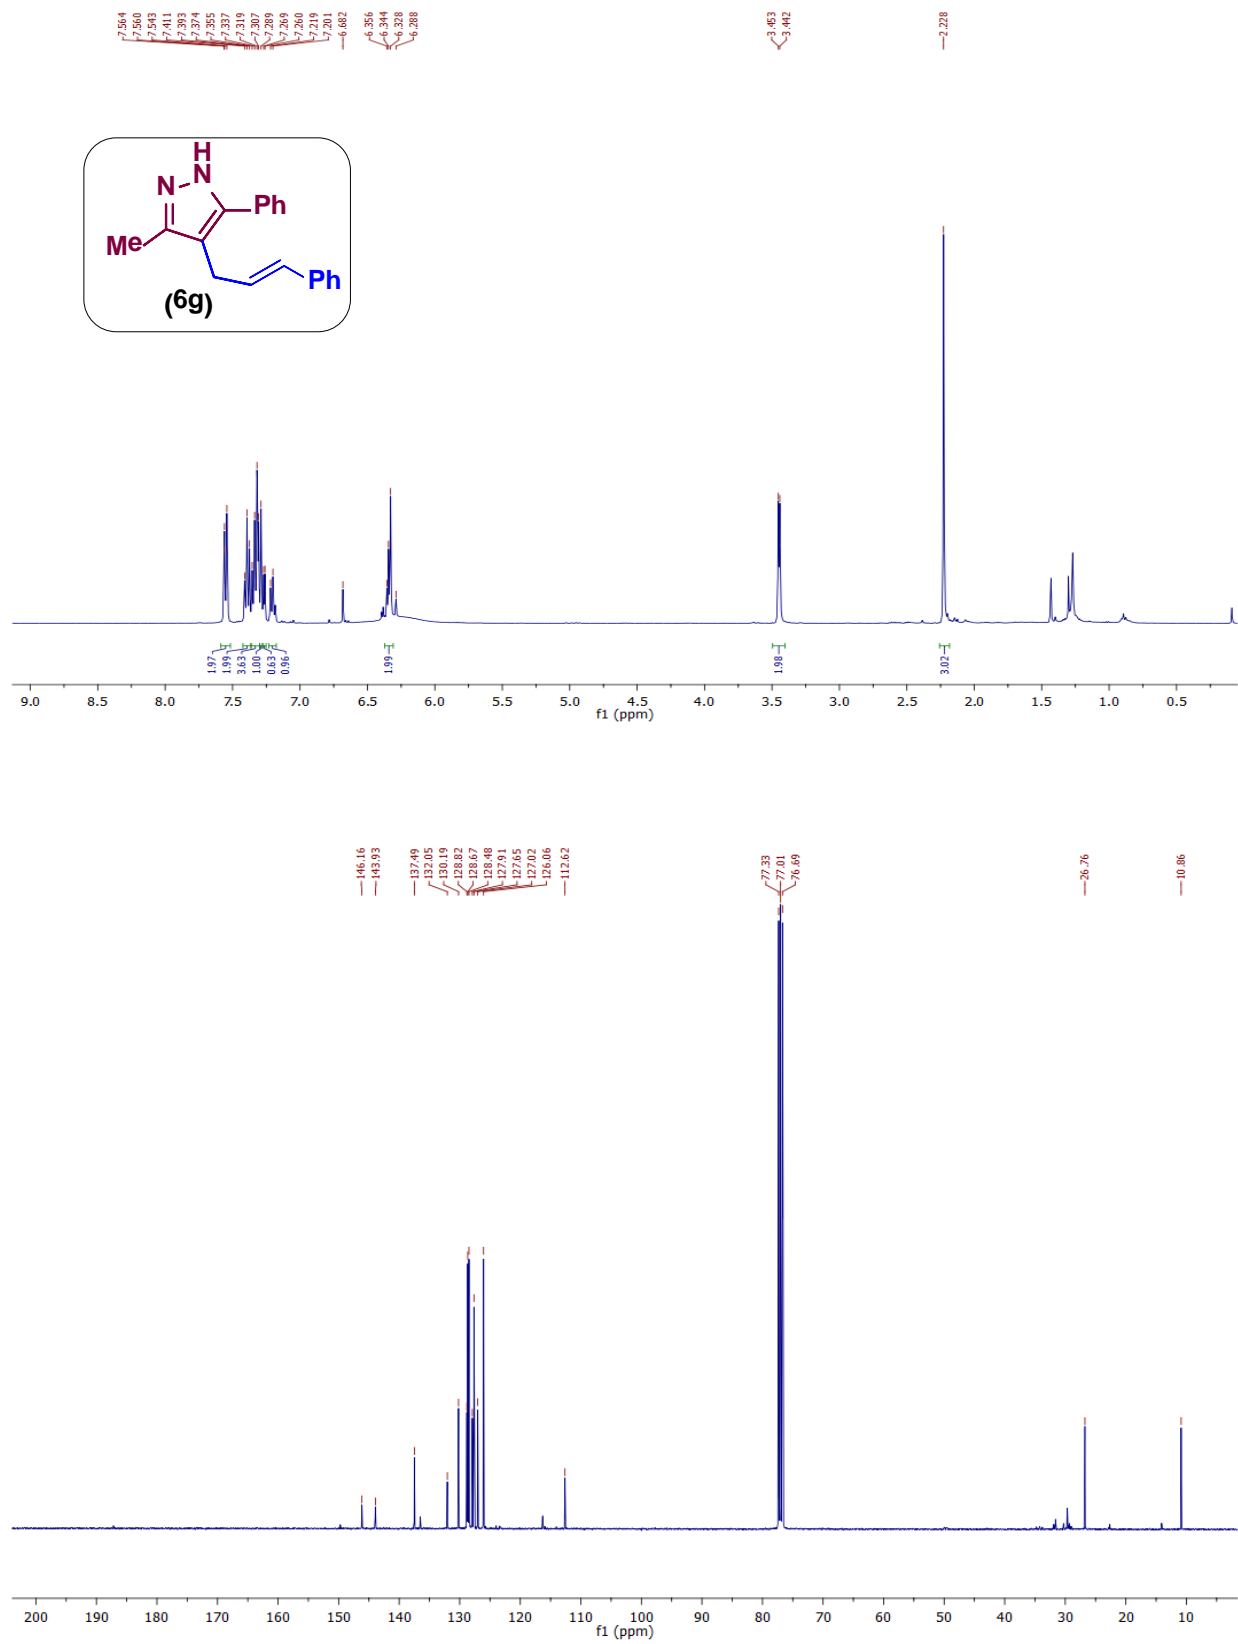

Figure S46 <sup>1</sup>H and <sup>13</sup>C NMR spectra of **6g**

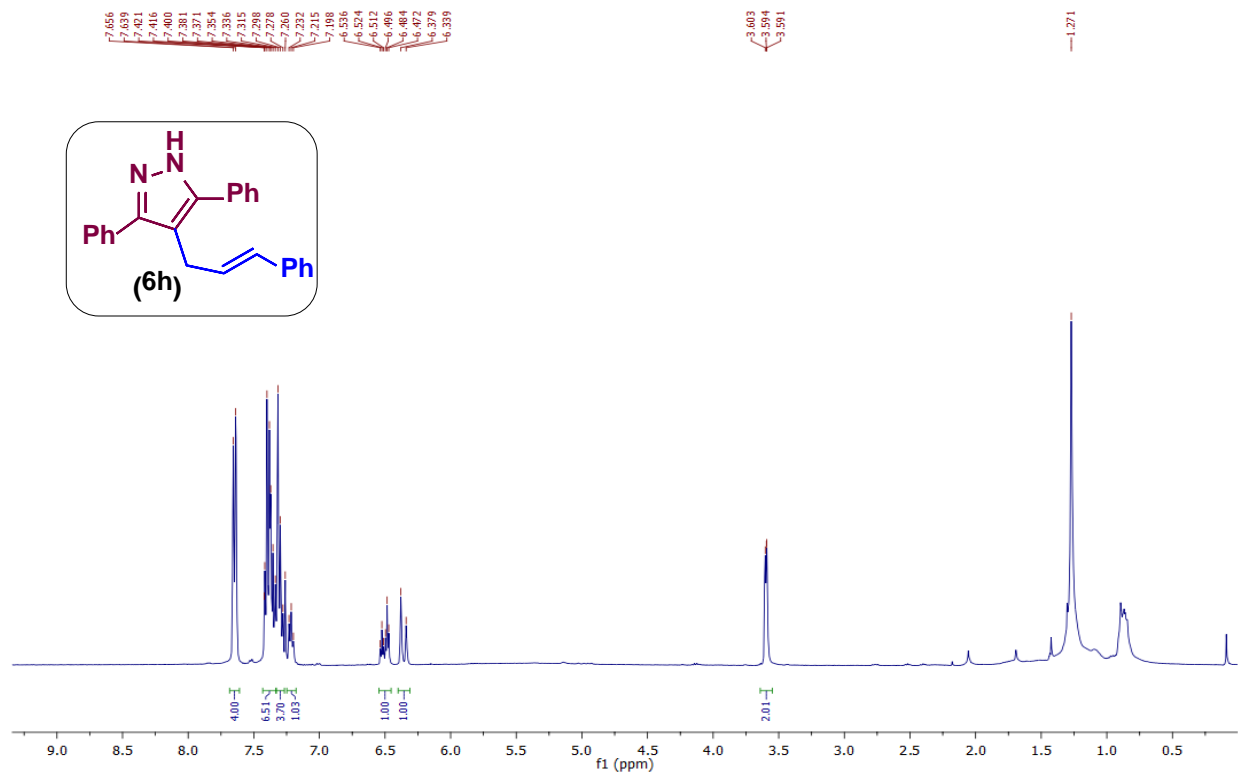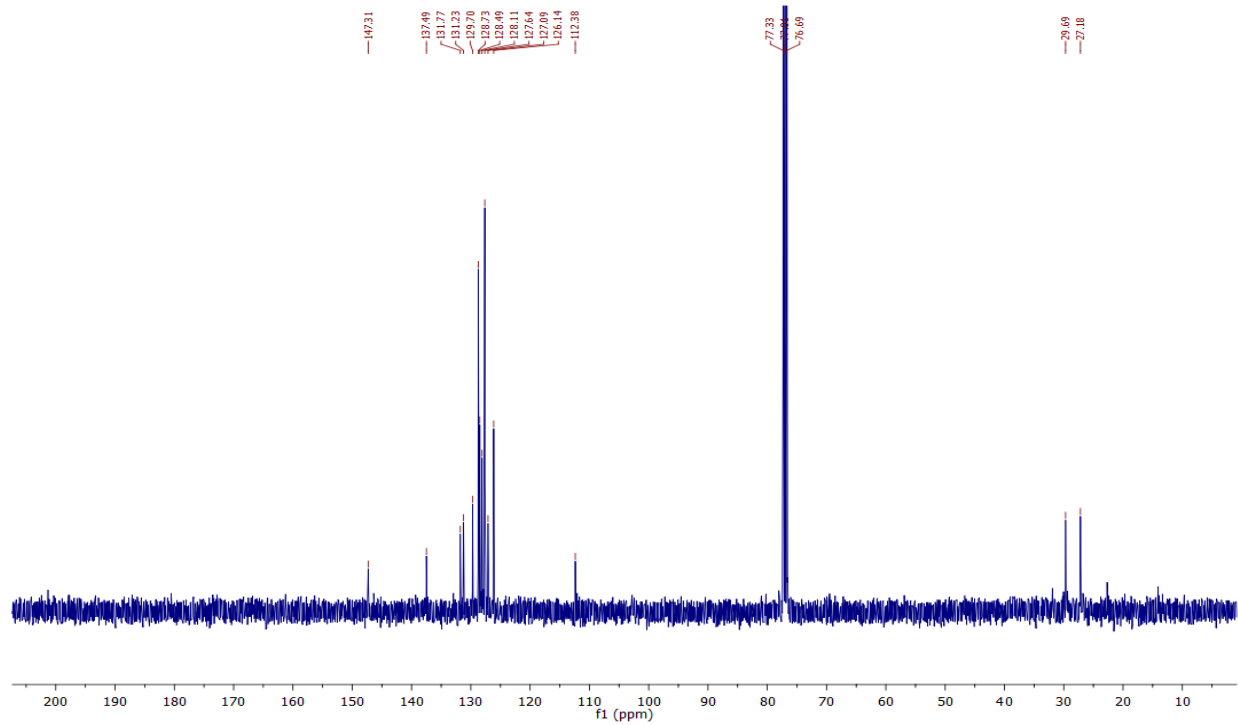

Figure S47 <sup>1</sup>H and <sup>13</sup>C NMR spectra of **6h**

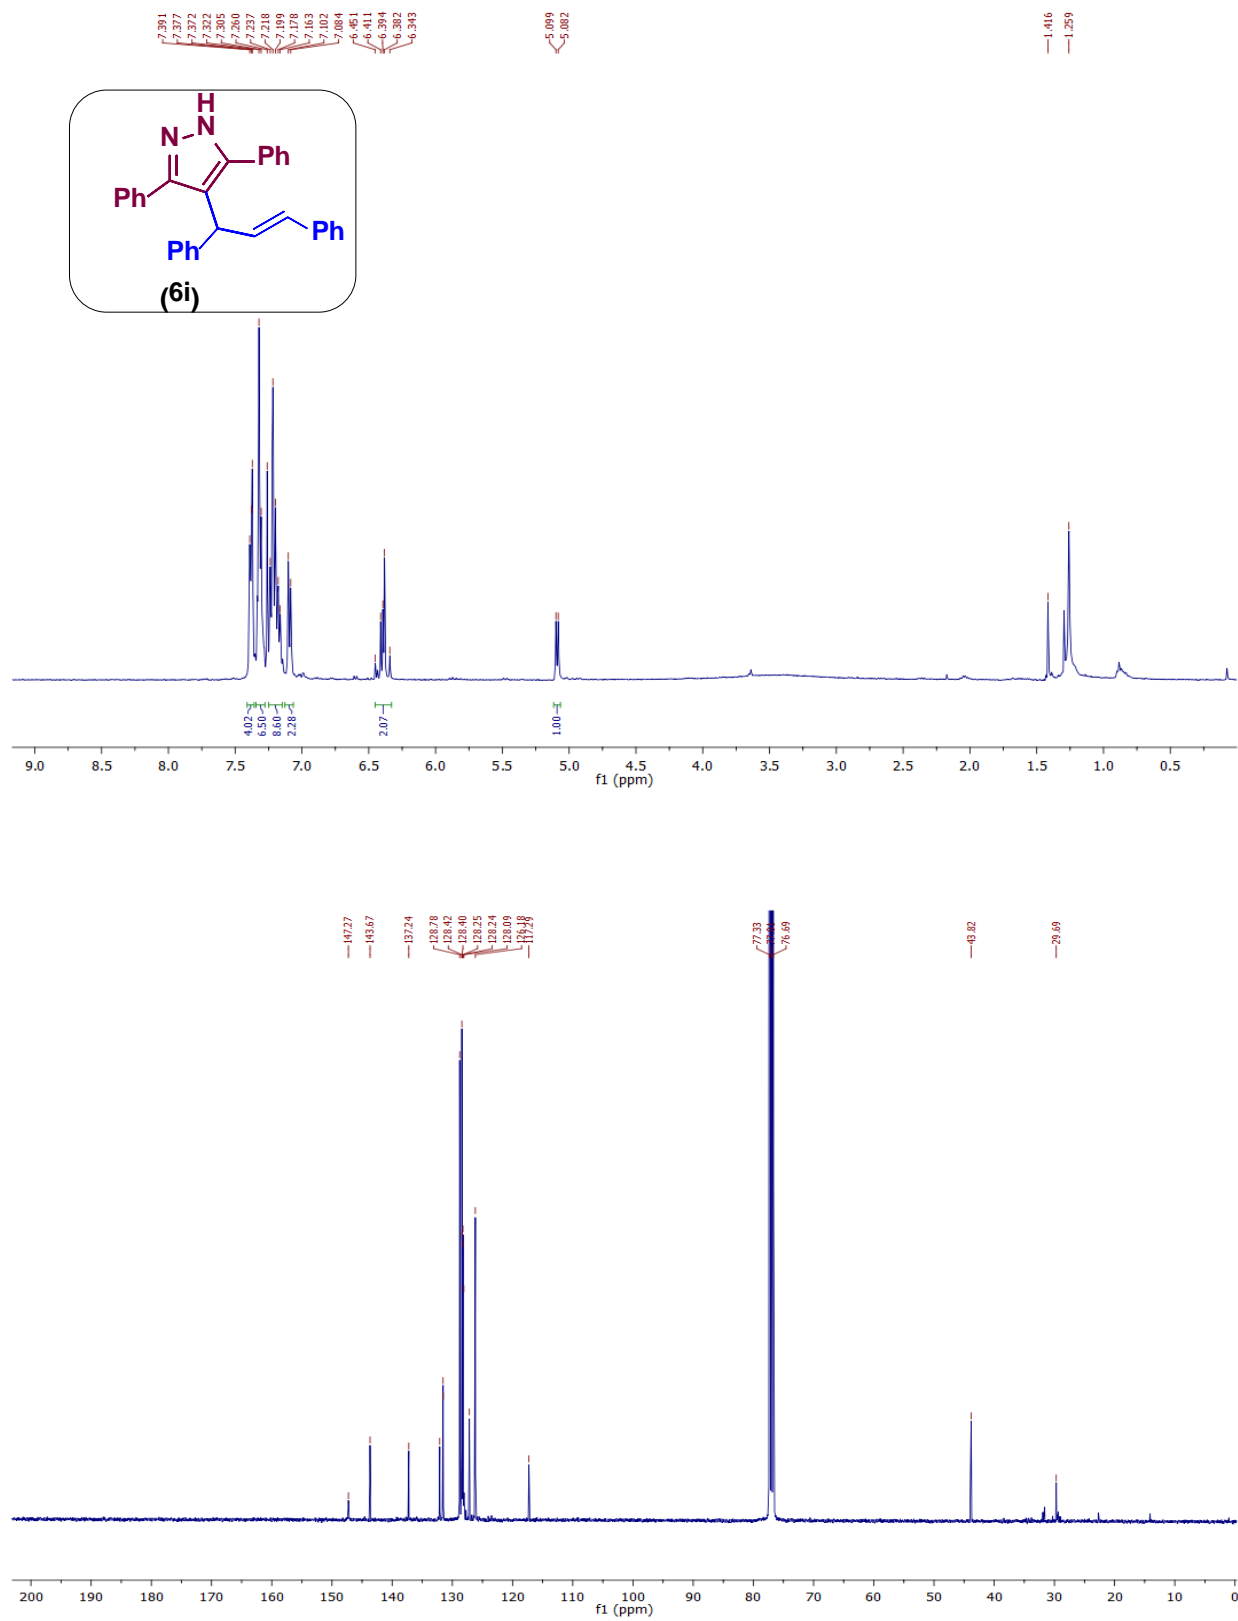

Figure S48 <sup>1</sup>H and <sup>13</sup>C NMR spectra of **6i**



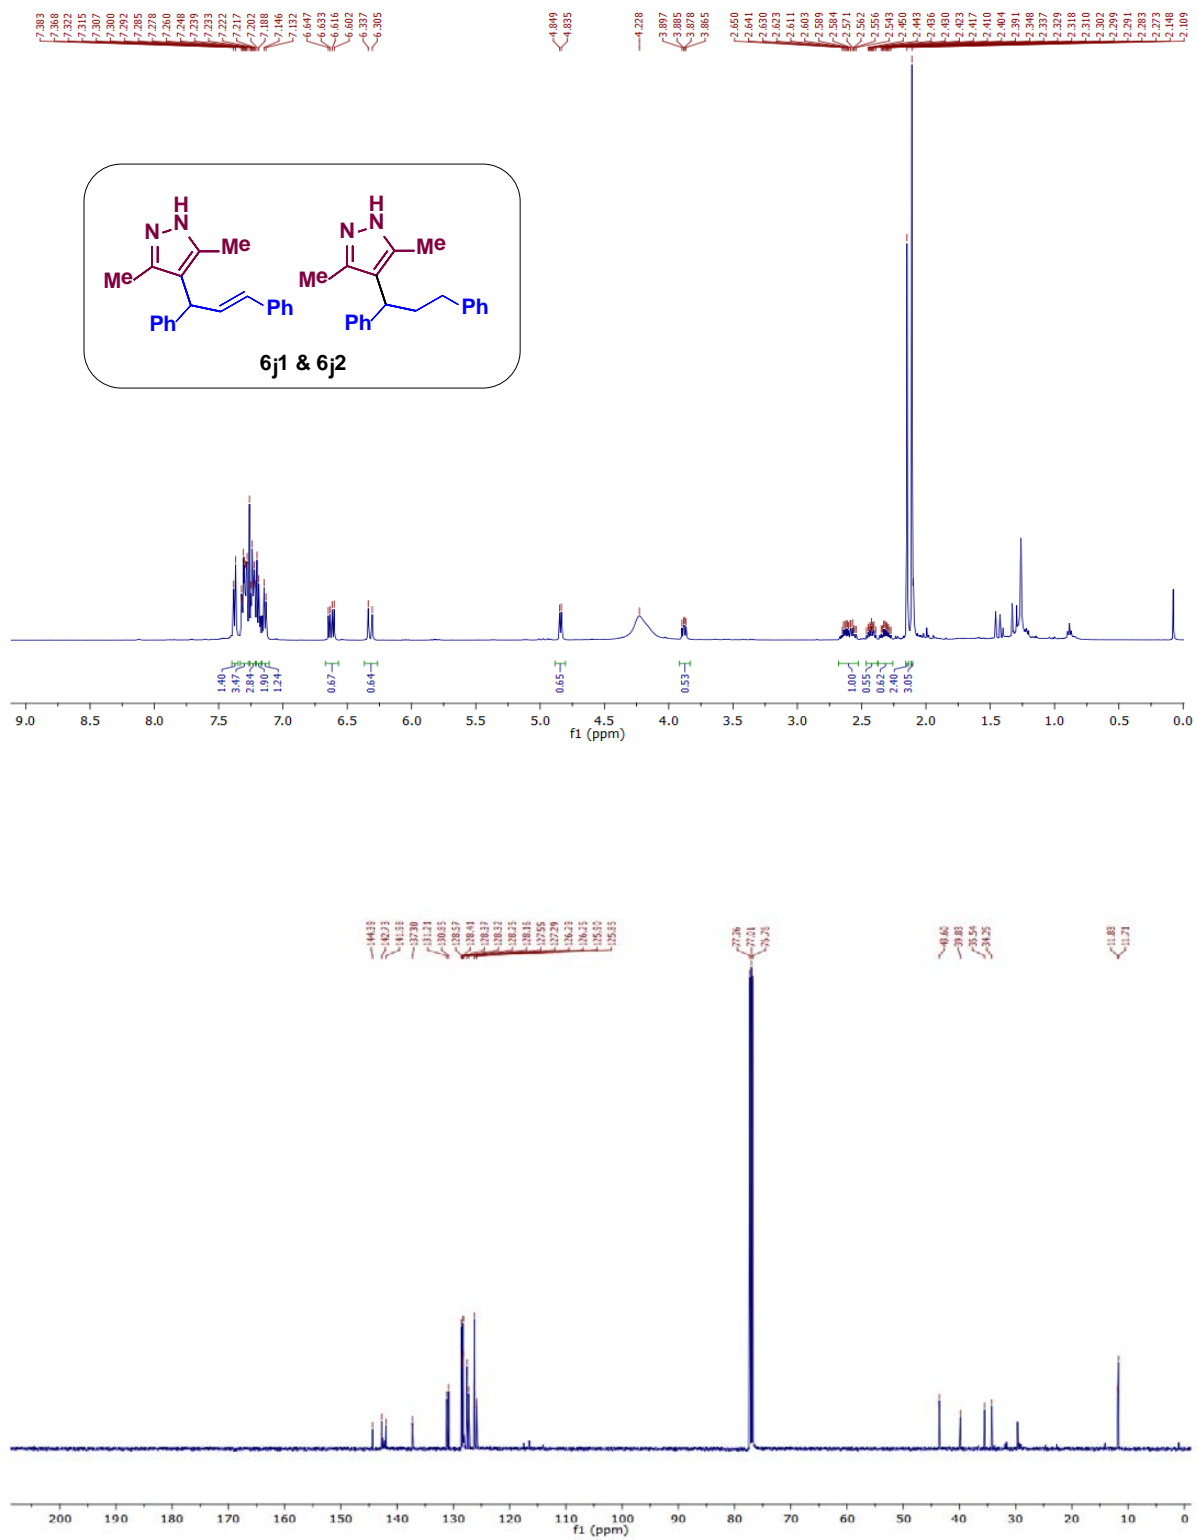

Figure S49  $^1\text{H}$  and  $^{13}\text{C}$  NMR spectra of **6j**

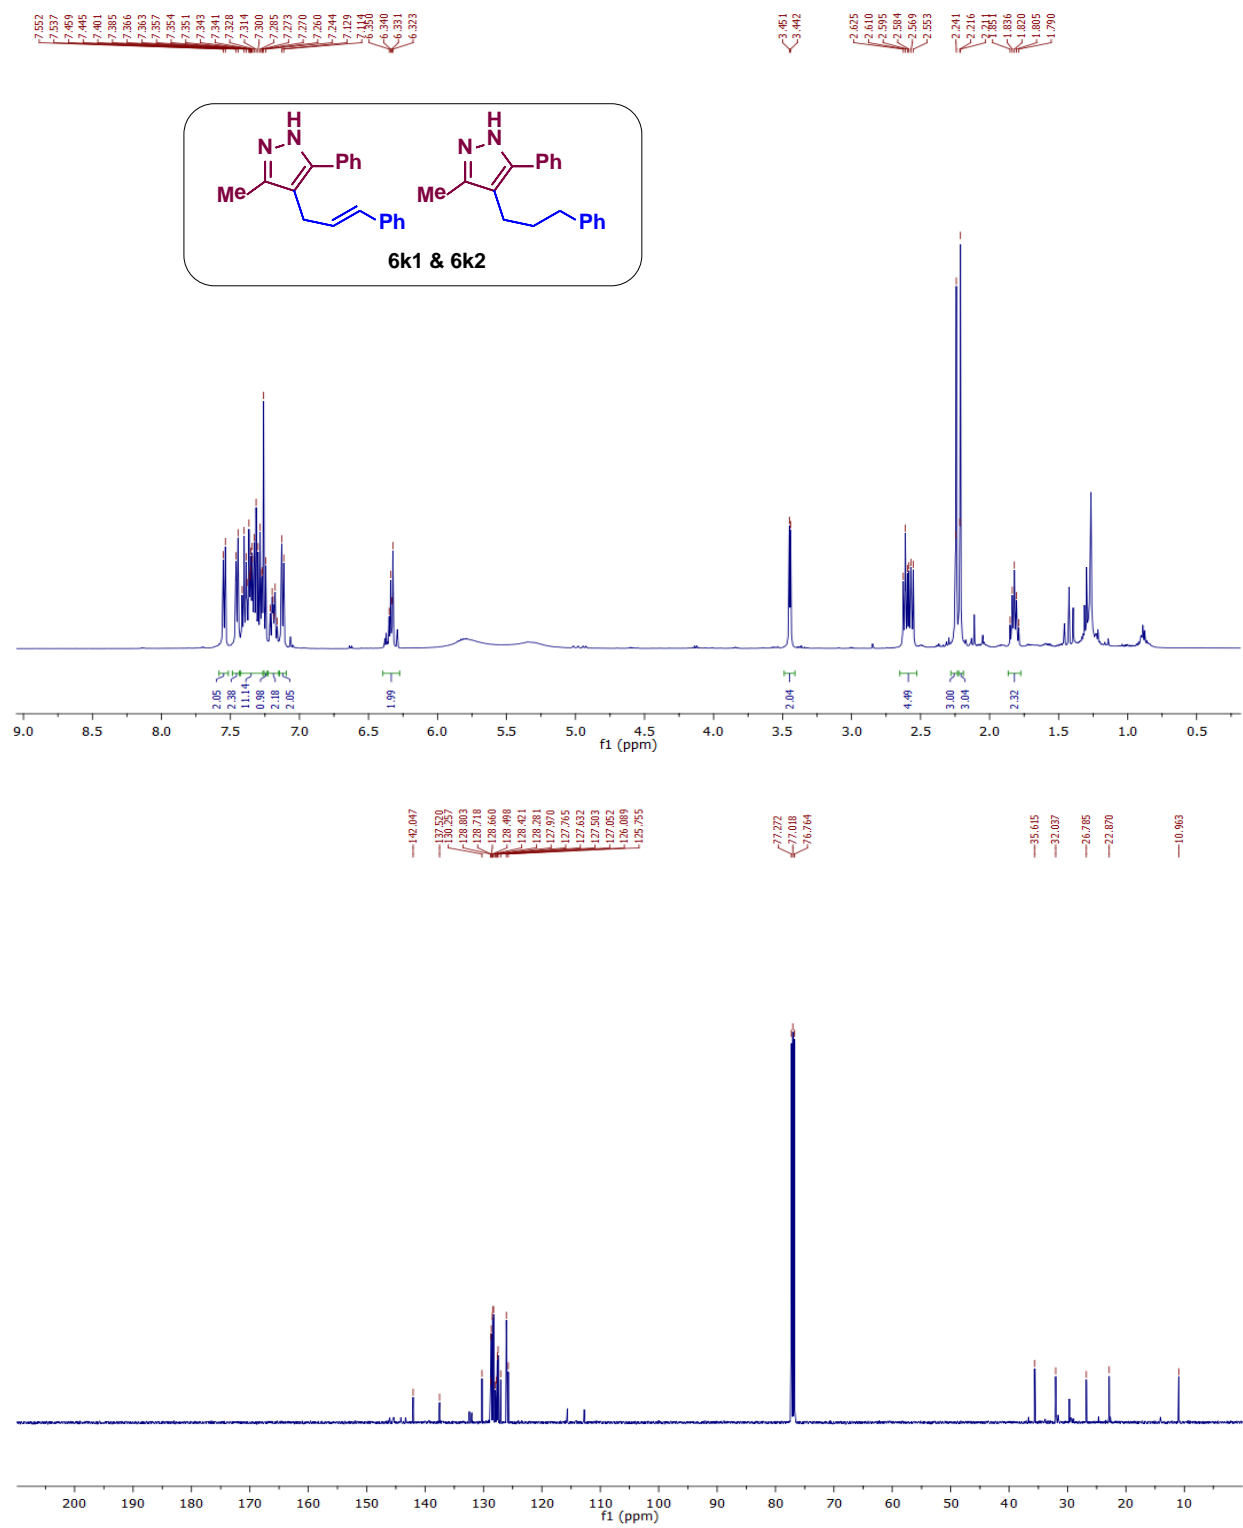

Figure S50 <sup>1</sup>H and <sup>13</sup>C NMR spectra of **6k**



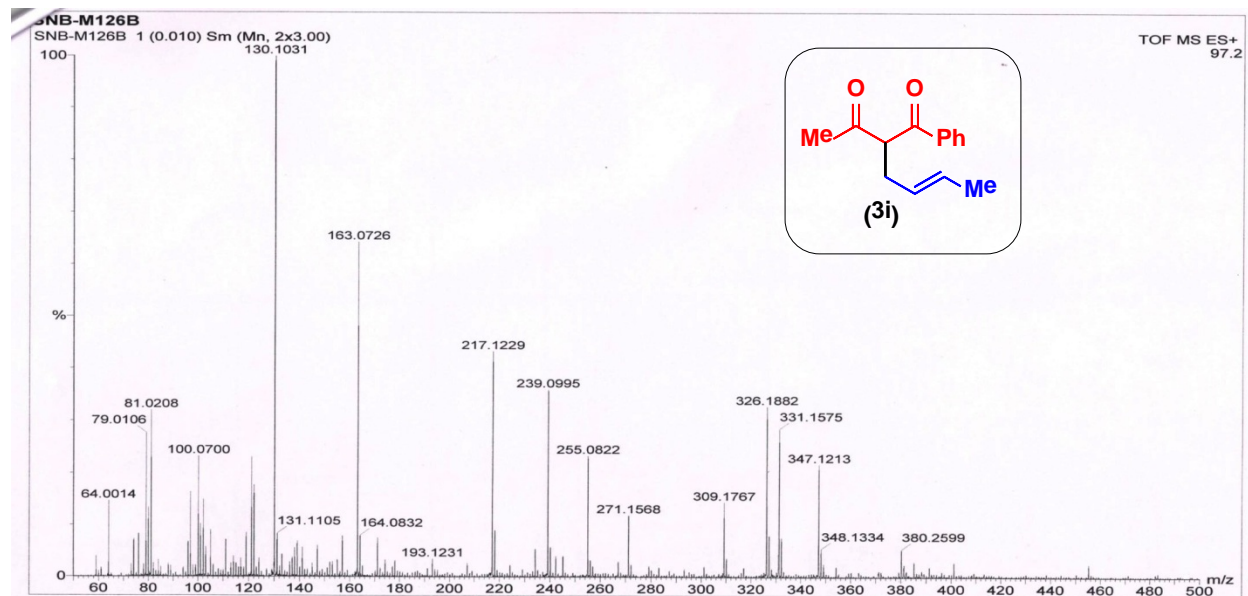

Figure S52 HRMS of **3i**

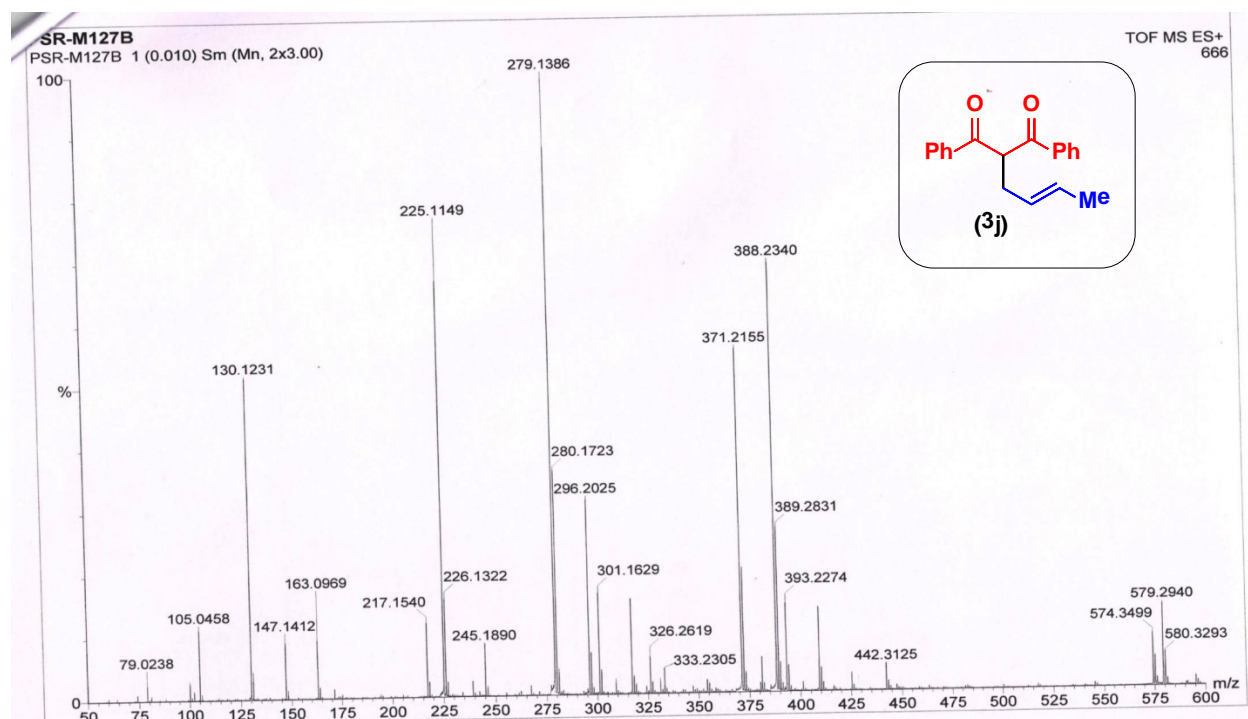

Figure S53 HRMS of **3j**

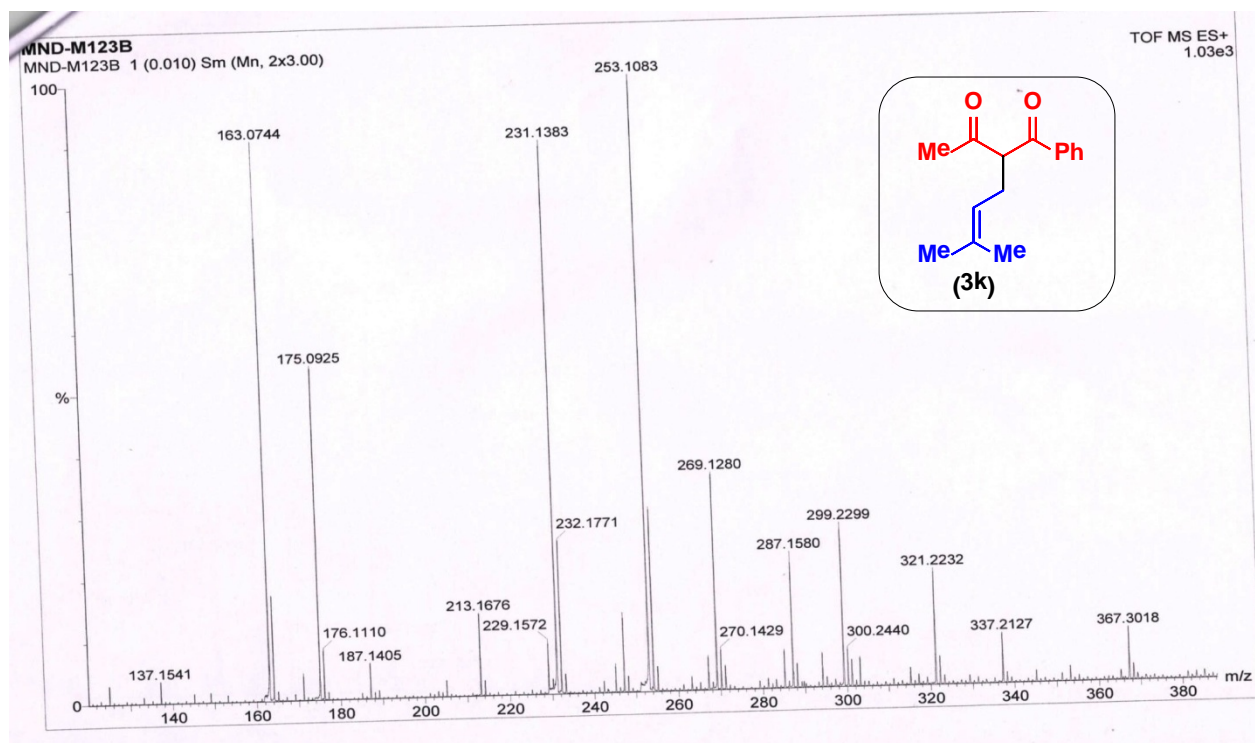

Figure S54 HRMS of **3k**

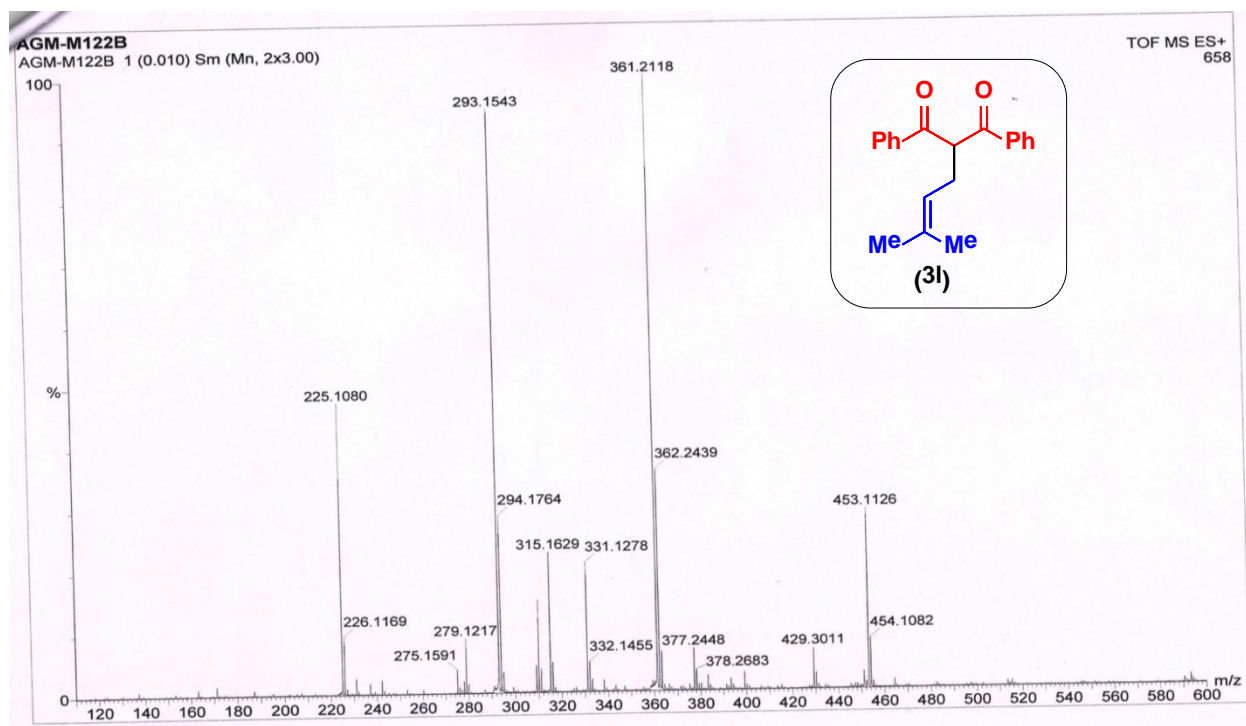

Figure S55 HRMS of **3l**

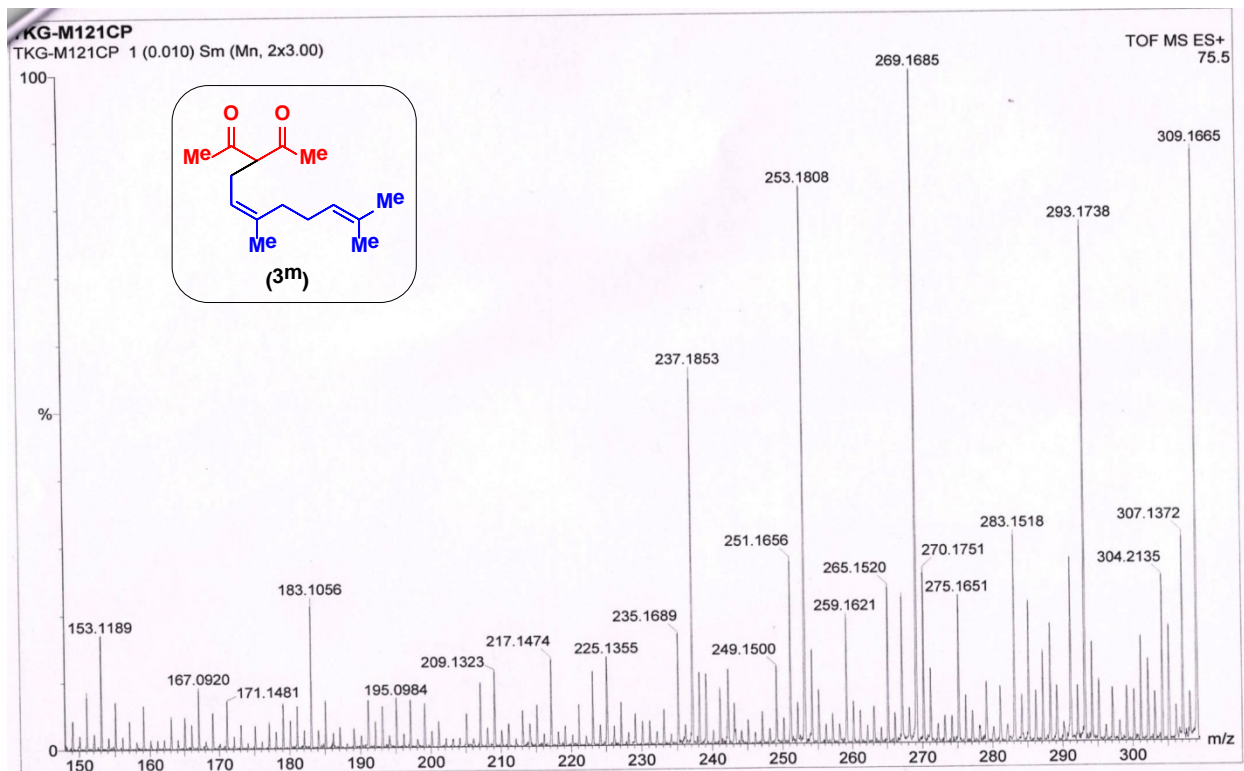

Figure S56 HRMS of **3m**

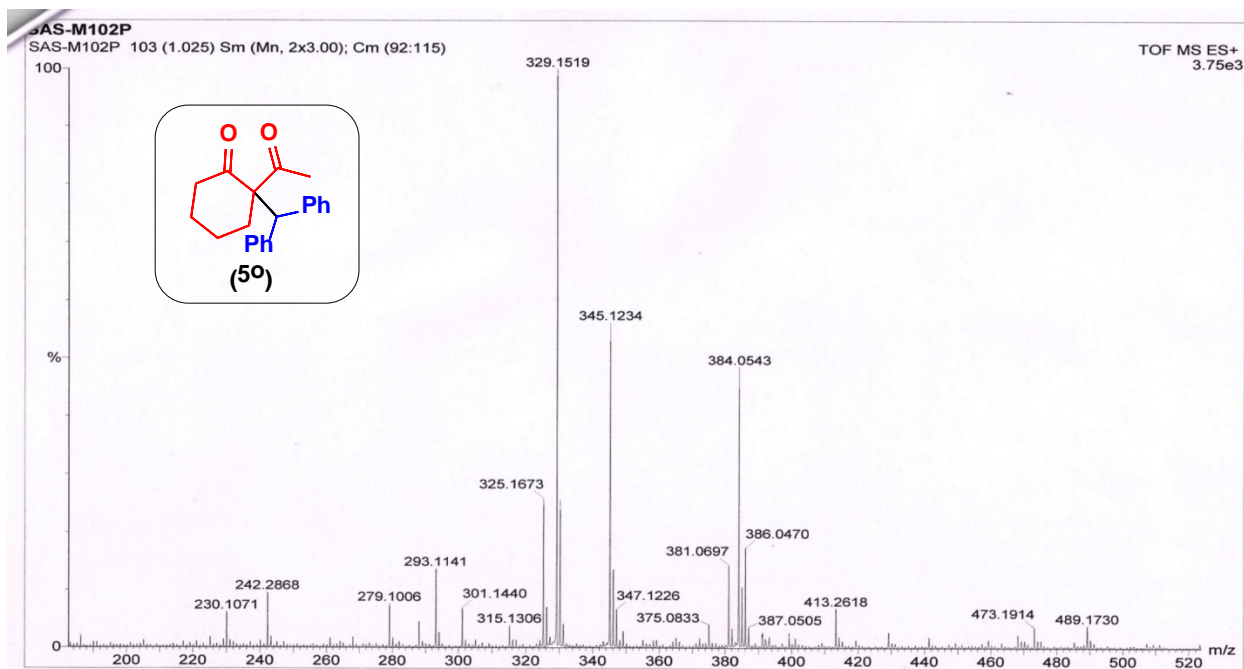

Figure S57 HRMS of **5o**

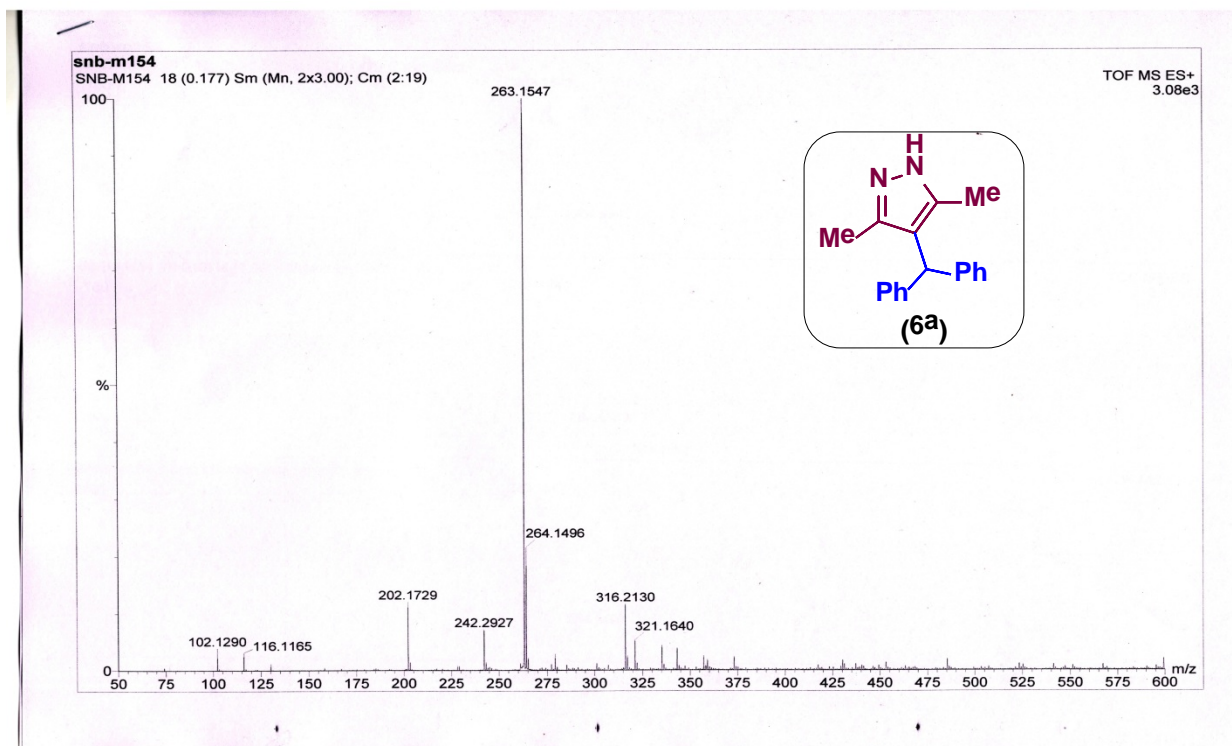

Figure S58 HRMS of **6a**

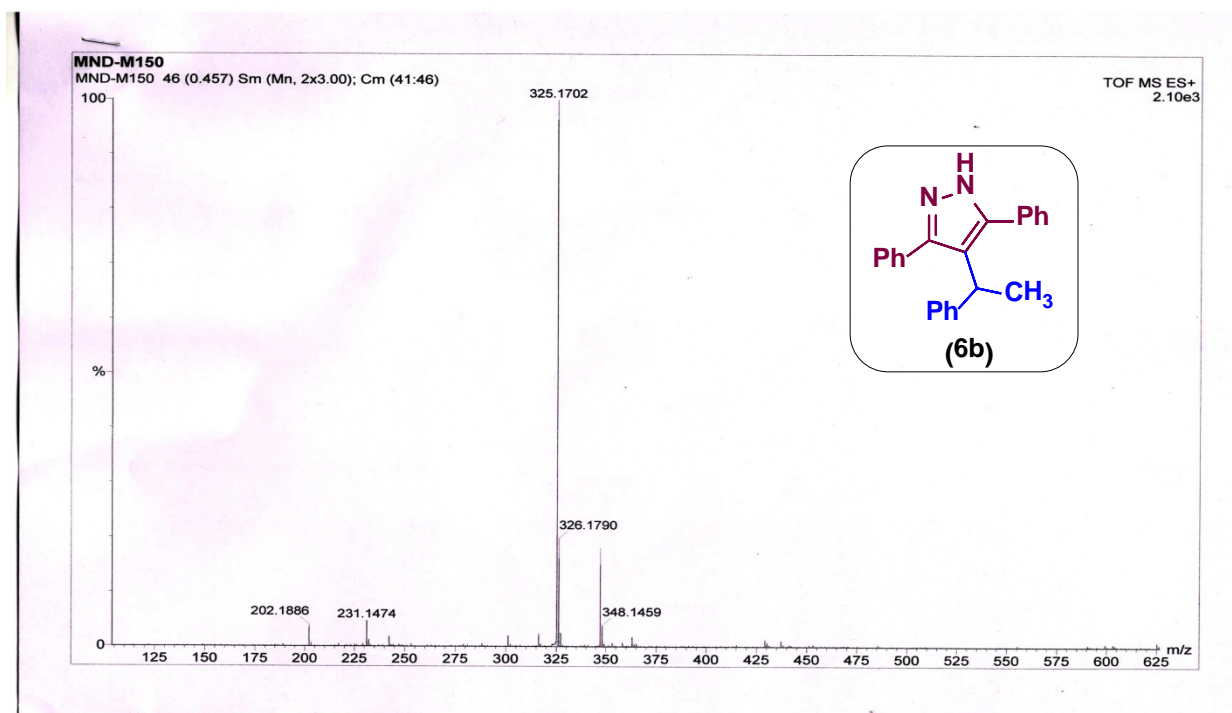

Figure S59 HRMS of **6b**

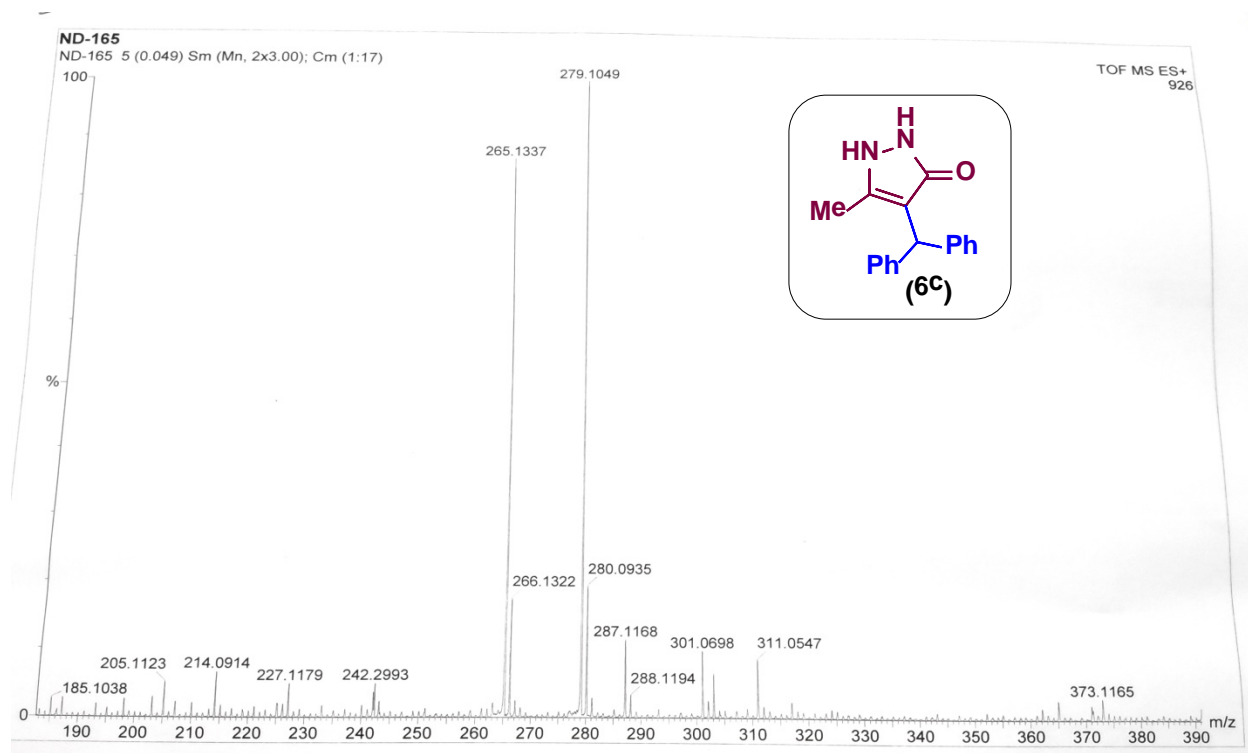

Figure S60 HRMS of **6c**

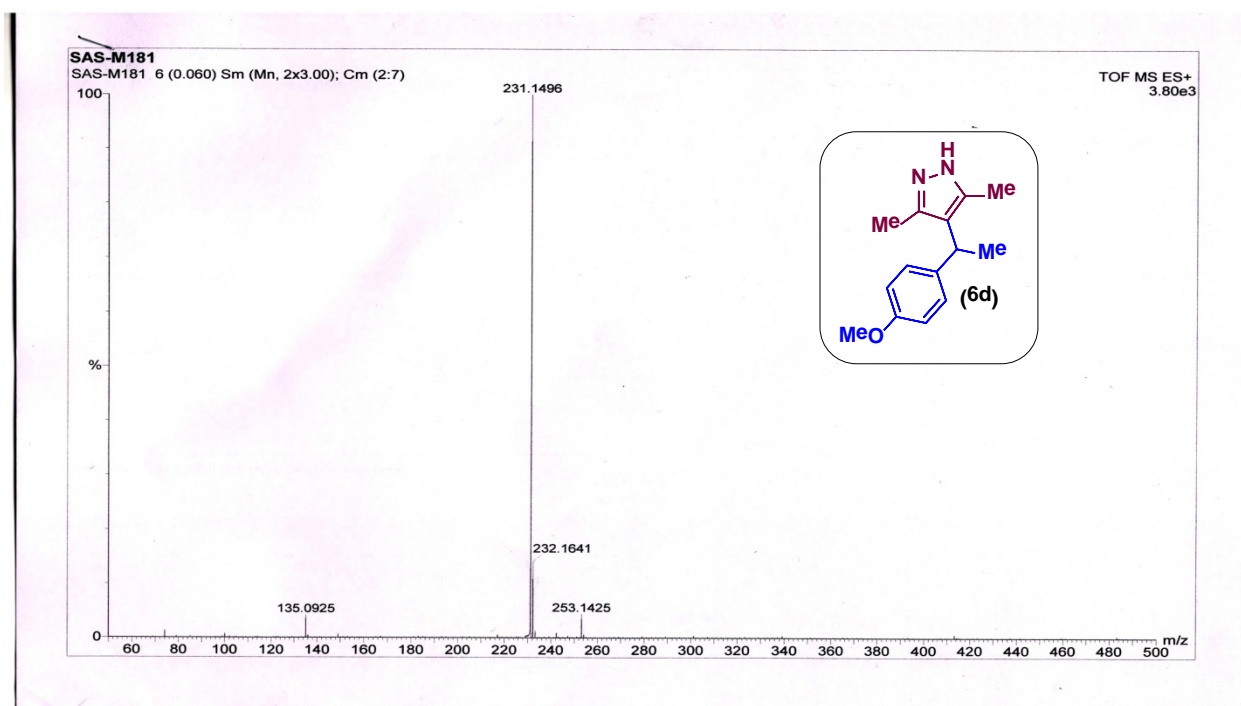

Figure S61 HRMS of **6d**



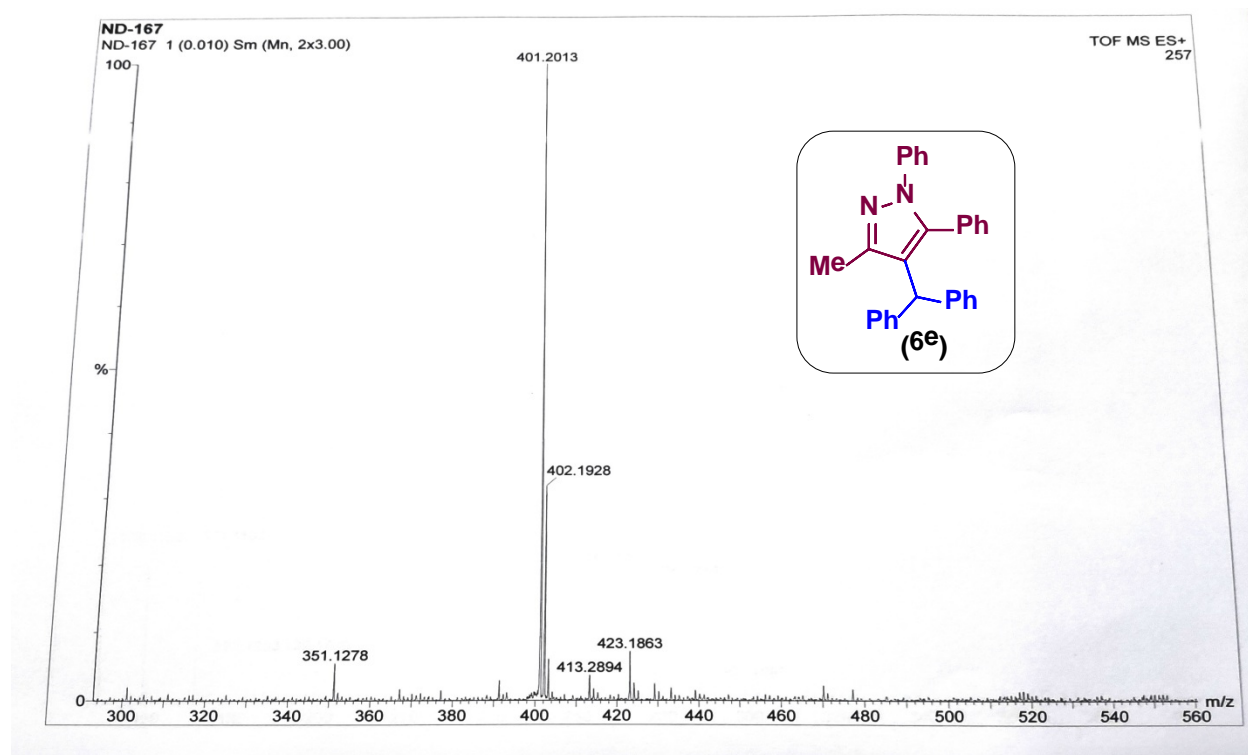

Figure S62 HRMS of **6e**

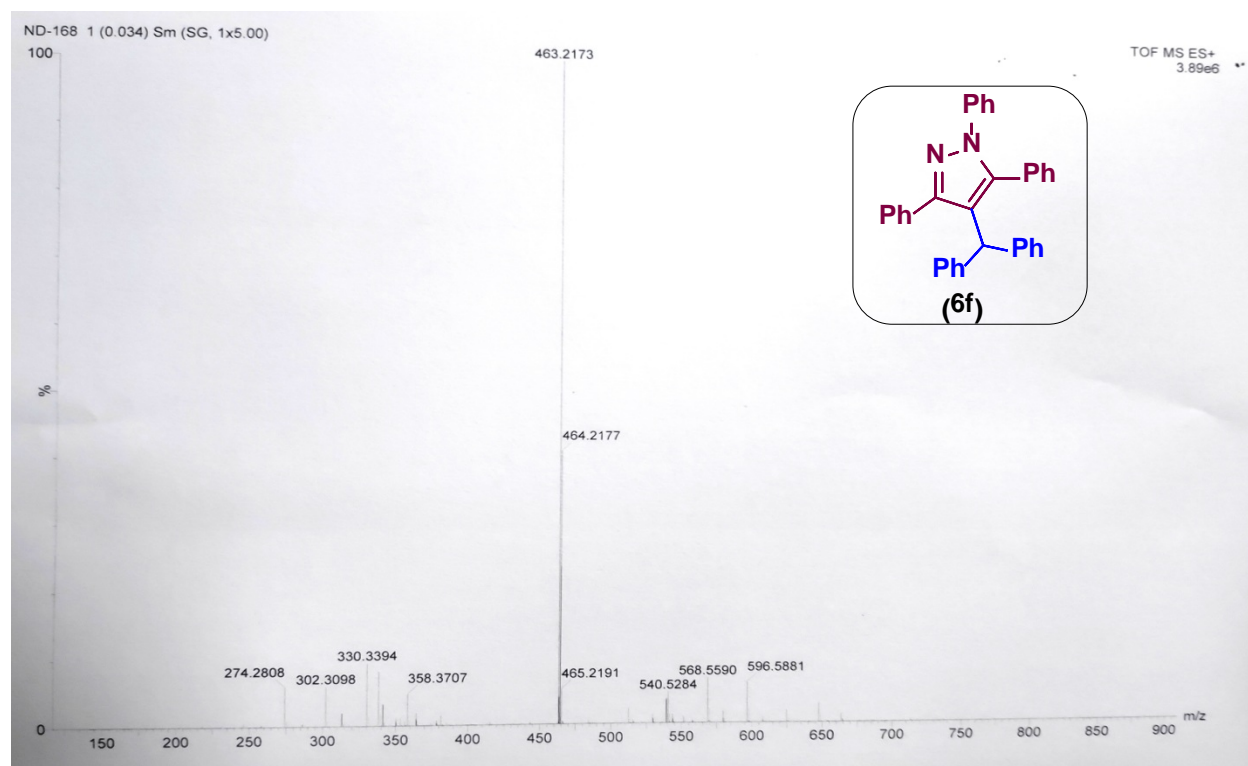

Figure S63 HRMS of **6f**

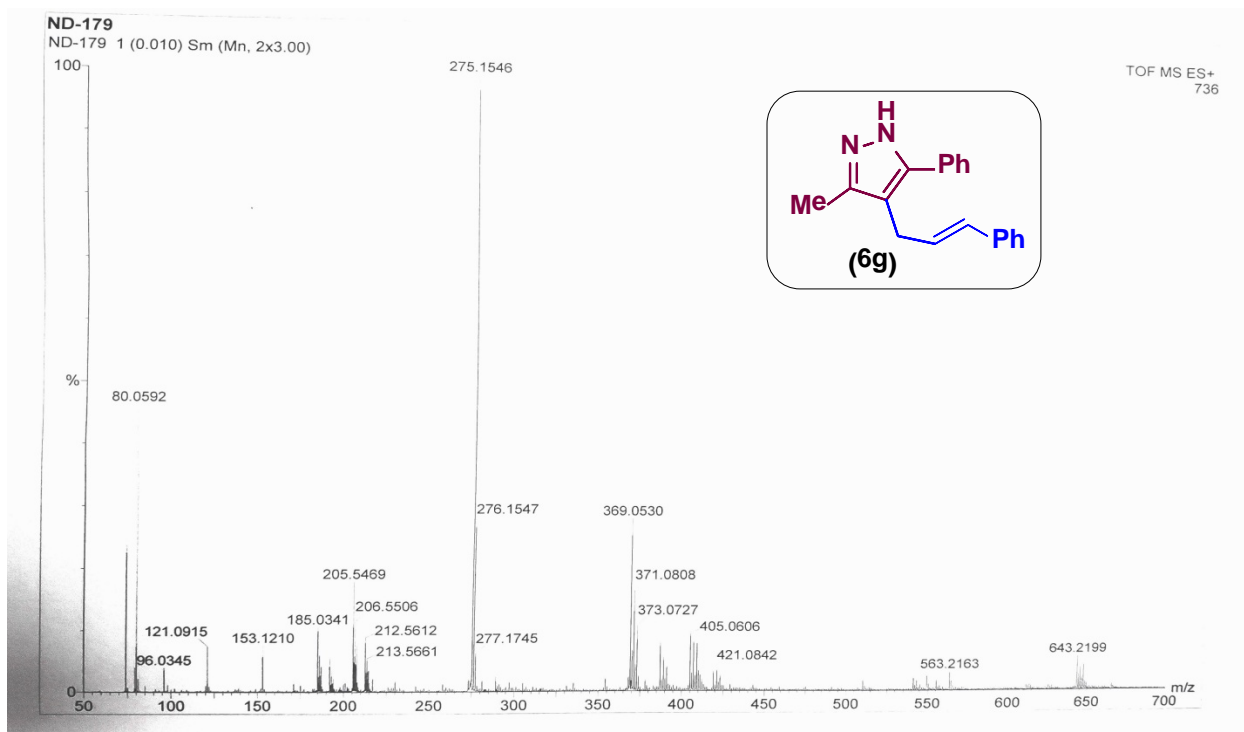

Figure S64 HRMS of **6g**

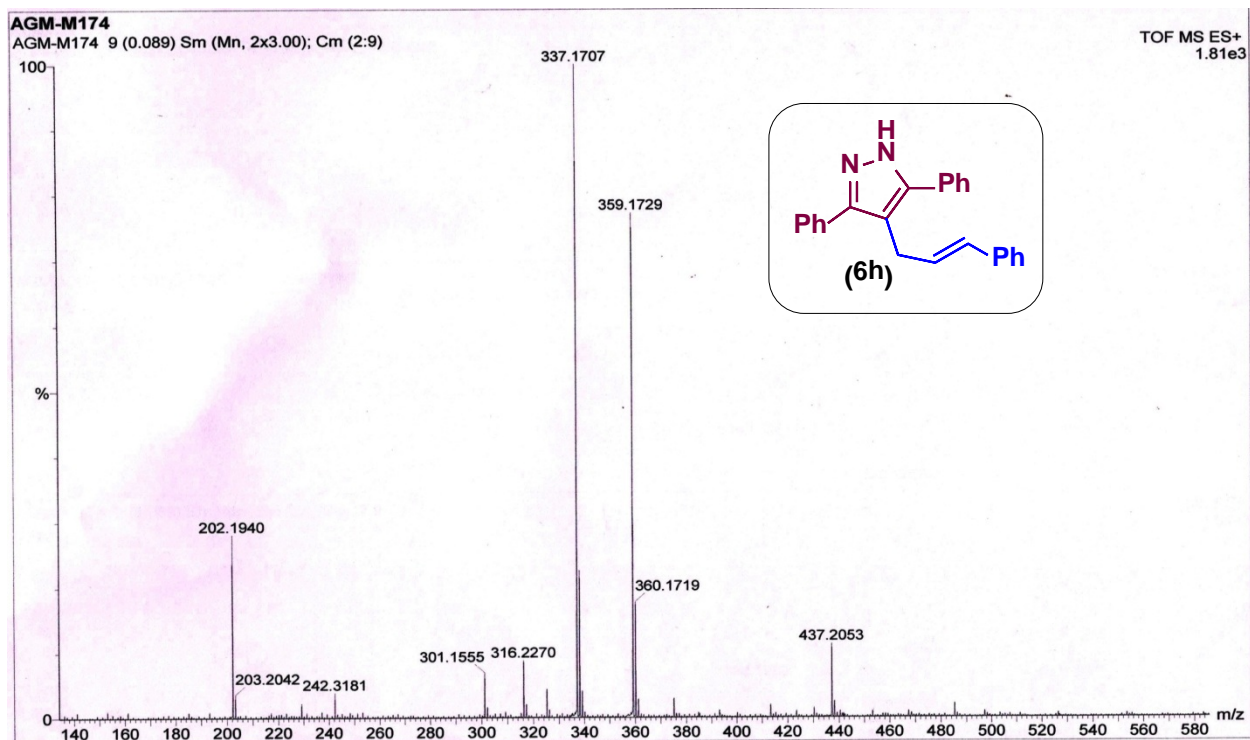

Figure S65 HRMS of **6h**

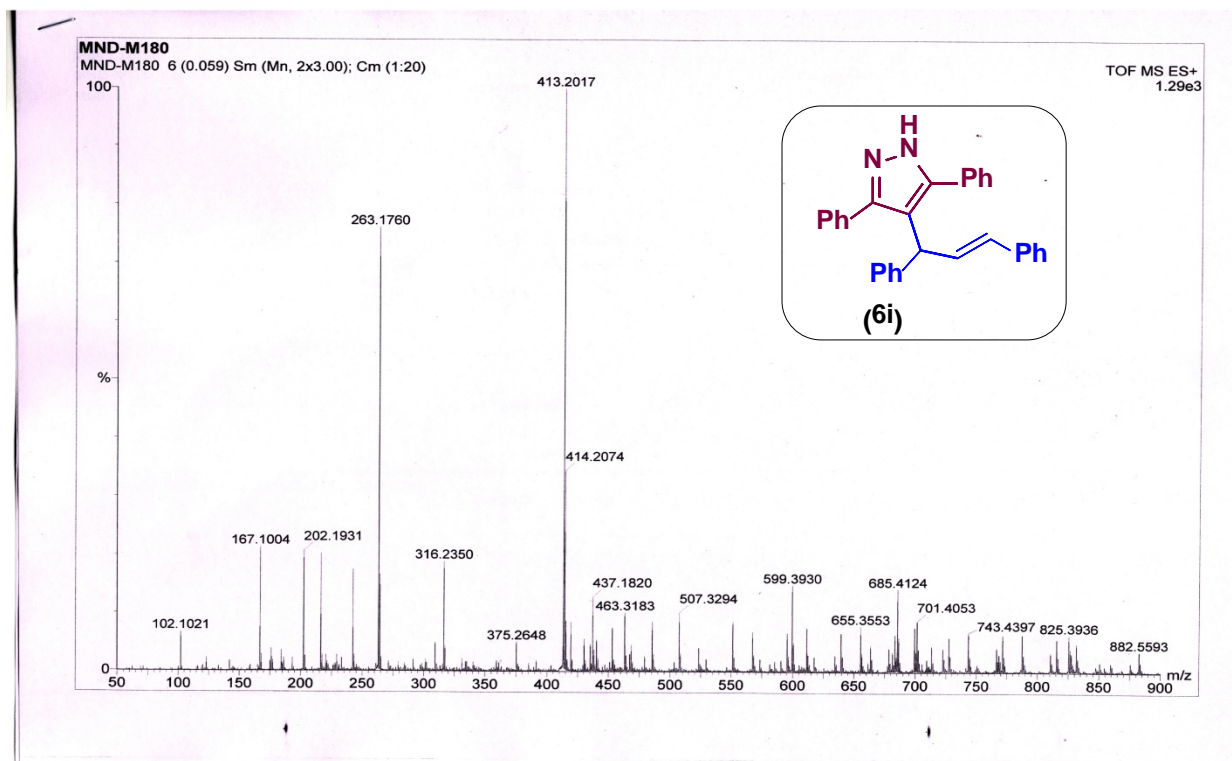

Figure S66 HRMS of **6i**

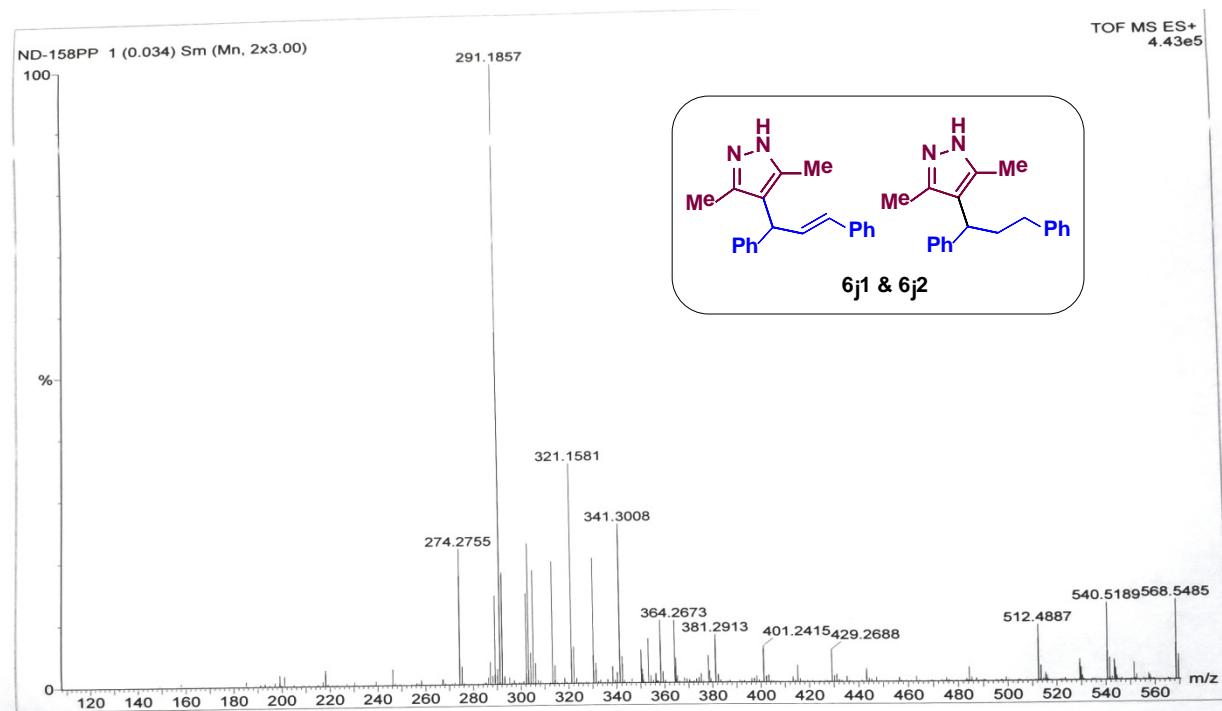

Figure S67 HRMS of **6j**

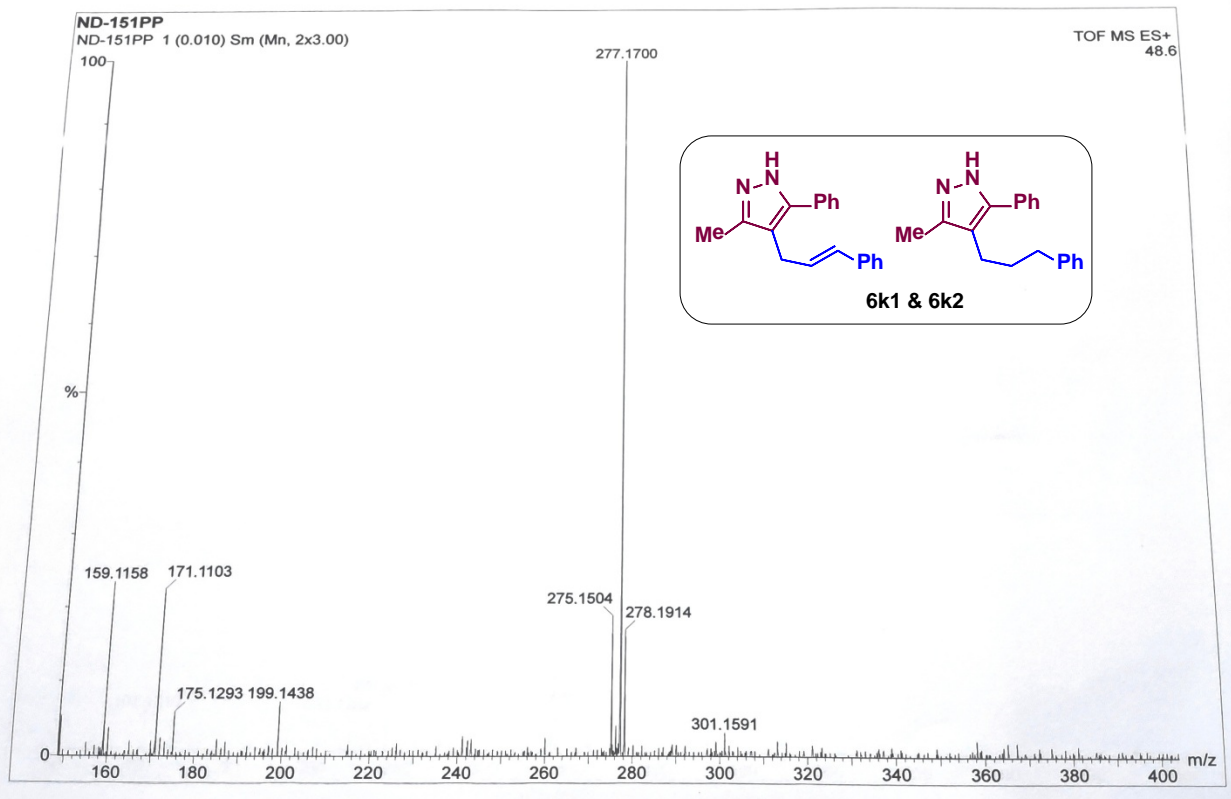

Figure S68 HRMS of **6k**

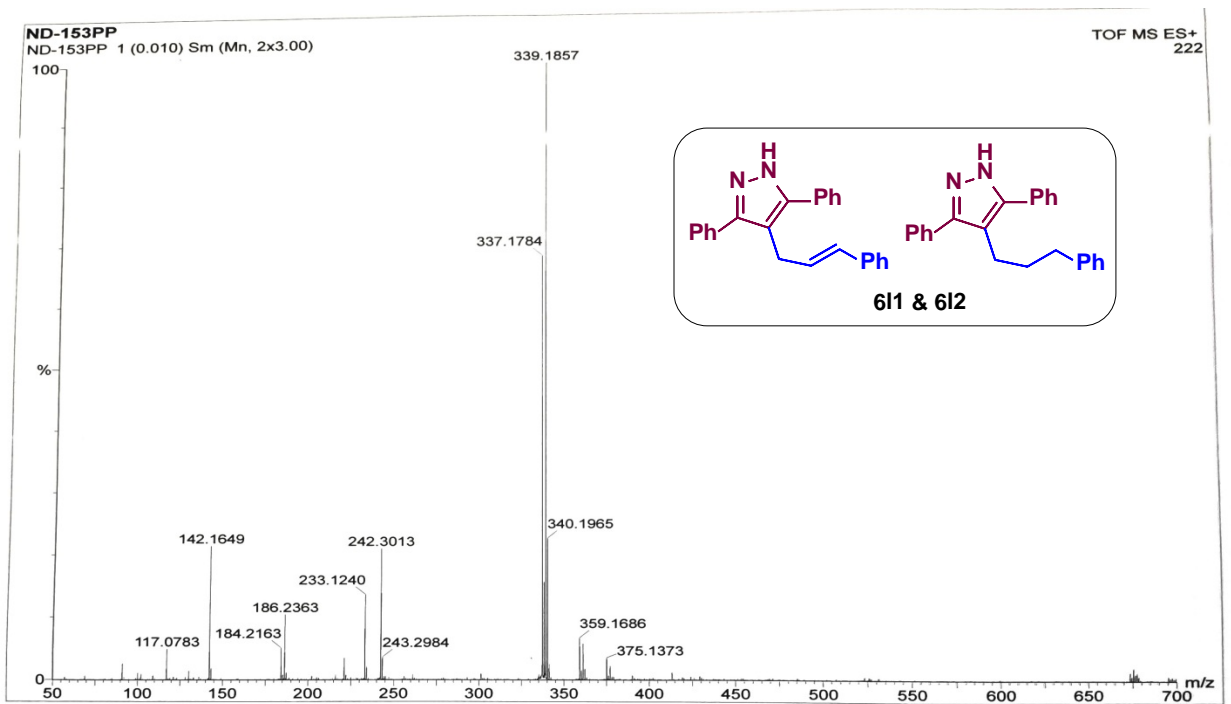

Figure S69 HRMS of **6l**
